# Supplementary material
Source: publisher figshare collection journal article supplement (https://acs.figshare.com/ndownloader/files/24354040)
Supplement: Supplementary file 1 [file 24354040]

## Supplementary Information

### Talascortenes A–G, Highly Oxygenated Diterpenoid Acids from the Sea-Anemone-Derived Endozoic Fungus *Talaromyces scorteus* AS-242

Ling-Hong Meng,<sup>\*,†,‡,§</sup> Xiao-Ming Li,<sup>†,‡,§</sup> Fan-Zhong Zhang,<sup>†,⊥</sup> Ya-Nan Wang,<sup>†,⊥</sup> and Bin-Gui Wang<sup>\*,†,‡,§</sup>

<sup>†</sup>Key Laboratory of Experimental Marine Biology, Chinese Academy of Sciences, Nanhai Road 7, Qingdao 266071, People's Republic of China

<sup>‡</sup>Laboratory of Marine Biology and Biotechnology, Qingdao National Laboratory for Marine Science and Technology, Wenhai Road 1, Qingdao 266237, People's Republic of China

<sup>§</sup>Center for Ocean Mega-Science, Chinese Academy of Sciences, Nanhai Road 7, Qingdao 266071, People's Republic of China

<sup>⊥</sup>University of Chinese Academy of Sciences, Yuquan Road 19A, Beijing 100049, People's Republic of China

#### Corresponding Authors

\*Phone (L.-H. Meng): +86-532-82898890. E-mail: [menglh@ms.qdio.ac.cn](mailto:menglh@ms.qdio.ac.cn).

\*Phone (B.-G. Wang): +86-532-82898553. E-mail: [wangbg@ms.qdio.ac.cn](mailto:wangbg@ms.qdio.ac.cn).

## Content

- Figure S1.**  $^1\text{H}$  NMR (500 MHz,  $\text{DMSO-}d_6$ ) spectrum of compound **1**;
- Figure S2.**  $^{13}\text{C}$  NMR (125 MHz,  $\text{DMSO-}d_6$ ) and DEPT spectra of compound **1**;
- Figure S3.** COSY spectrum of compound **1**;
- Figure S4.** HSQC spectrum of compound **1**;
- Figure S5.** HMBC spectrum of compound **1**;
- Figure S6.** NOESY spectrum of compound **1**;
- Figure S7.** ECD spectrum of compound **1**;
- Figure S8.**  $^1\text{H}$  NMR (500 MHz,  $\text{DMSO-}d_6$ ) spectrum of compound **2**;
- Figure S9.**  $^{13}\text{C}$  NMR (125 MHz,  $\text{DMSO-}d_6$ ) and DEPT spectra of compound **2**;
- Figure S10.** COSY spectrum of compound **2**;
- Figure S11.** HSQC spectrum of compound **2**;
- Figure S12.** HMBC spectrum of compound **2**;
- Figure S13.** NOESY spectrum of compound **2**;
- Figure S14.** ECD spectrum of compound **2**;
- Figure S15.**  $^1\text{H}$  NMR (500 MHz,  $\text{DMSO-}d_6$ ) spectrum of compound **3**;
- Figure S16.**  $^{13}\text{C}$  NMR (125 MHz,  $\text{DMSO-}d_6$ ) and DEPT spectra of compound **3**;
- Figure S17.** COSY spectrum of compound **3**;
- Figure S18.** HSQC spectrum of compound **3**;
- Figure S19.** HMBC spectrum of compound **3**;
- Figure S20.** NOESY spectrum of compound **3**;
- Figure S21.** ECD spectrum of compound **3**;
- Figure S22.**  $^1\text{H}$  NMR (500 MHz,  $\text{DMSO-}d_6$ ) spectrum of compound **4**;
- Figure S23.**  $^{13}\text{C}$  NMR (125 MHz,  $\text{DMSO-}d_6$ ) and DEPT spectra of compound **4**;
- Figure S24.** COSY spectrum of compound **4**;
- Figure S25.** HSQC spectrum of compound **4**;
- Figure S26.** HMBC spectrum of compound **4**;
- Figure S27.** NOESY spectrum of compound **4**;
- Figure S28.** ECD spectrum of compound **4**;
- Figure S29.**  $^1\text{H}$  NMR (600 MHz,  $\text{DMSO-}d_6$ ) spectrum of compound **5**;
- Figure S30.**  $^{13}\text{C}$  NMR (150 MHz,  $\text{DMSO-}d_6$ ) and DEPT spectra of compound **5**;
- Figure S31.** COSY spectrum of compound **5**;
- Figure S32.** HSQC spectrum of compound **5**;

**Figure S33.** HMBC spectrum of compound **5**;

**Figure S34.** NOESY spectrum of compound **5**;

**Figure S35.** ECD spectrum of compound **5**;

**Figure S36.**  $^1\text{H}$  NMR (500 MHz,  $\text{DMSO-}d_6$ ) spectrum of compound **6**;

**Figure S37.**  $^{13}\text{C}$  NMR (125 MHz,  $\text{DMSO-}d_6$ ) and DEPT spectra of compound **6**;

**Figure S38.** COSY spectrum of compound **6**;

**Figure S39.** HSQC spectrum of compound **6**;

**Figure S40.** HMBC spectrum of compound **6**;

**Figure S41.** NOESY spectrum of compound **6**;

**Figure S42.** ECD spectrum of compound **6**;

**Figure S43.**  $^1\text{H}$  NMR (600 MHz,  $\text{DMSO-}d_6$ ) spectrum of compound **7**;

**Figure S44.**  $^{13}\text{C}$  NMR (150 MHz,  $\text{DMSO-}d_6$ ) and DEPT spectra of compound **7**;

**Figure S45.** COSY spectrum of compound **7**;

**Figure S46.** HSQC spectrum of compound **7**;

**Figure S47.** HMBC spectrum of compound **7**;

**Figure S48.** NOESY spectrum of compound **7**;

**Figure S49.** ECD spectrum of compound **7**;

**Figure S50.**  $^1\text{H}$  NMR (600 MHz,  $\text{DMSO-}d_6$ ) spectrum of compound **8**;

**Figure S51.**  $^{13}\text{C}$  NMR (150 MHz,  $\text{DMSO-}d_6$ ) and DEPT spectra of compound **8**;

**Figure S52.** COSY spectrum of compound **8**;

**Figure S53.** HSQC spectrum of compound **8**;

**Figure S54.** HMBC spectrum of compound **8**;

**Figure S55.** NOESY spectrum of compound **8**;

**Figure S56.** ECD spectrum of compound **8**;

**Figure S57.** Crystal packing of compound **1** at 300(2) K;

**Figure S58.** Crystal packing of compound **2** at 297(2) K;

**Figure S59.** Crystal packing of compound **3** at 293(2) K;

**Figure S60.** Crystal packing of compound **4** at 293(2) K;

**Figure S61.** Crystal packing of compound **5** at 298(2) K;

**Figure S62.** Crystal packing of compound **7** at 293(2) K;

**Figure S63.** Key NOESY correlations of compounds **1–5** and **7**.

**Table S1.** Crystal data and structure refinement for compounds **1–5** and **7**.

**Figure S1.**  $^1\text{H}$  NMR (500 MHz,  $\text{DMSO}-d_6$ ) spectrum of compound **1**

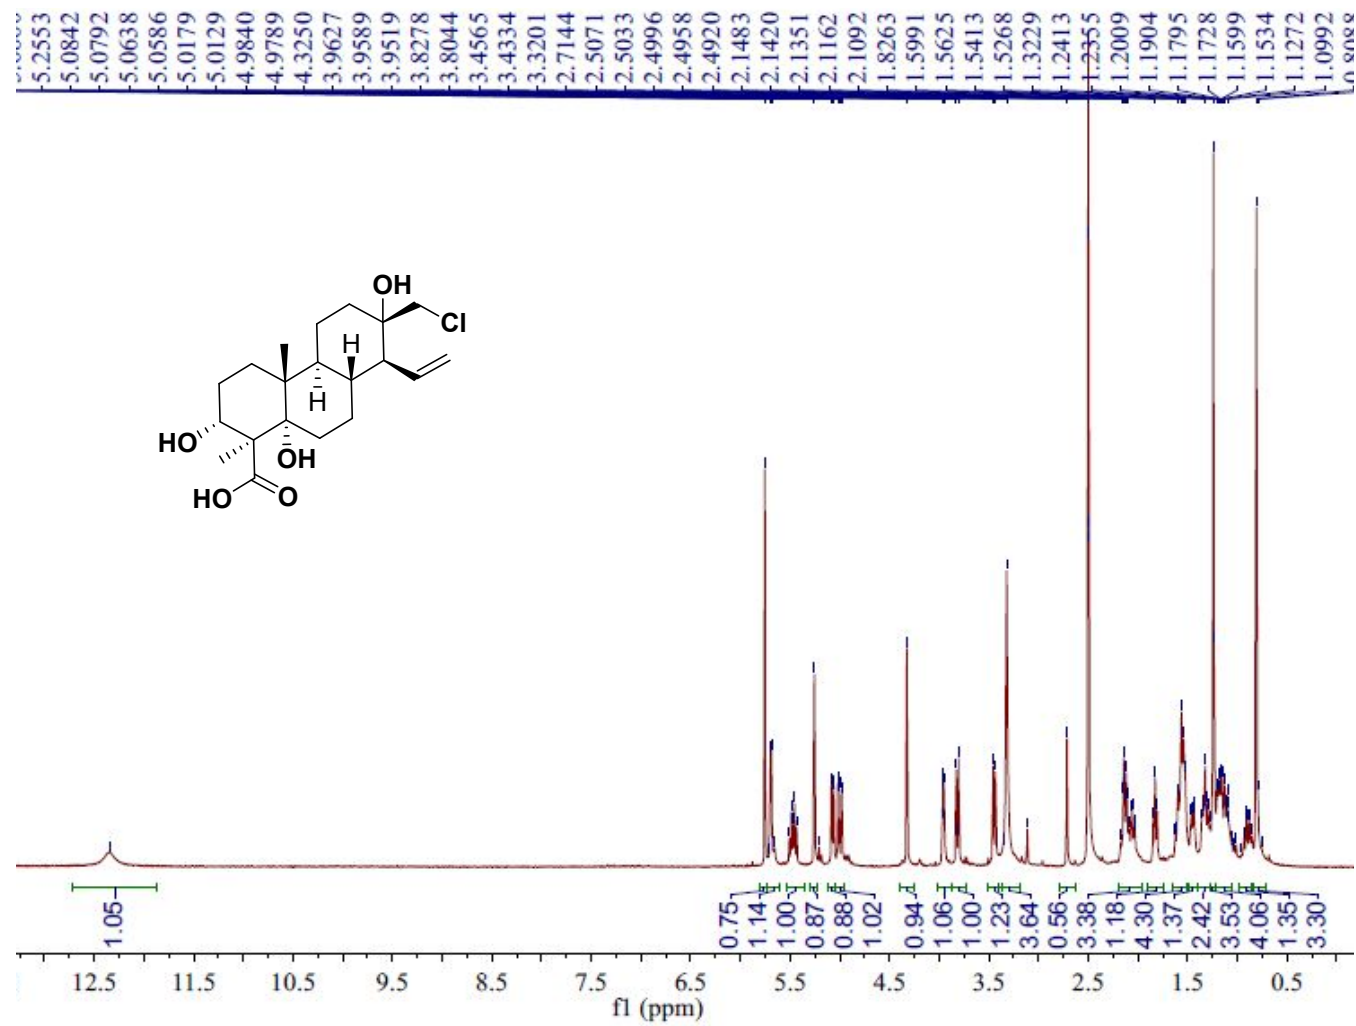

**Figure S2.**  $^{13}\text{C}$  NMR (125 MHz,  $\text{DMSO-}d_6$ ) and DEPT spectra of compound **1**

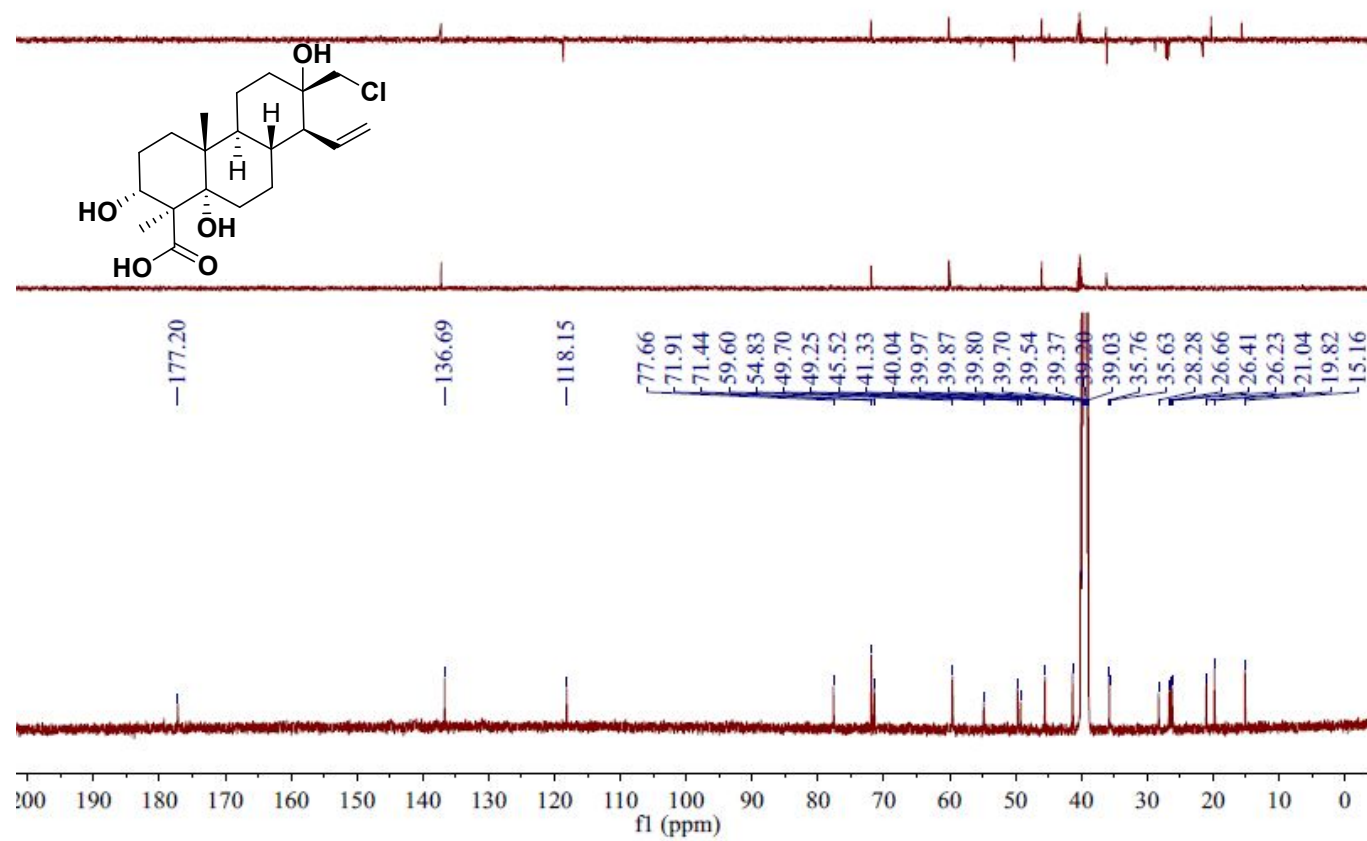

**Figure S3.** COSY spectrum of compound **1**

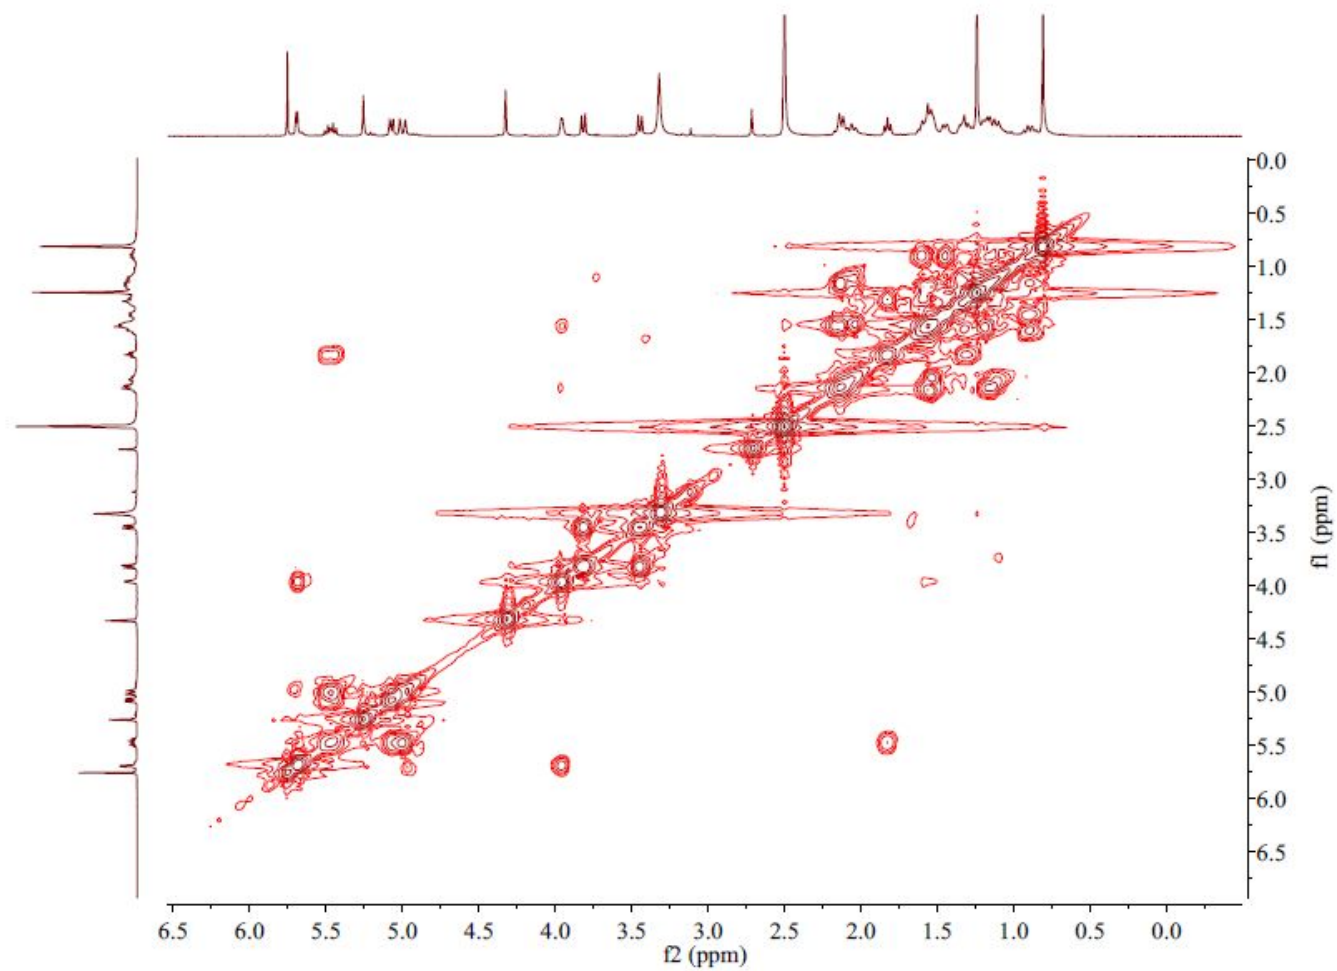

**Figure S4.** HSQC spectrum of compound **1**

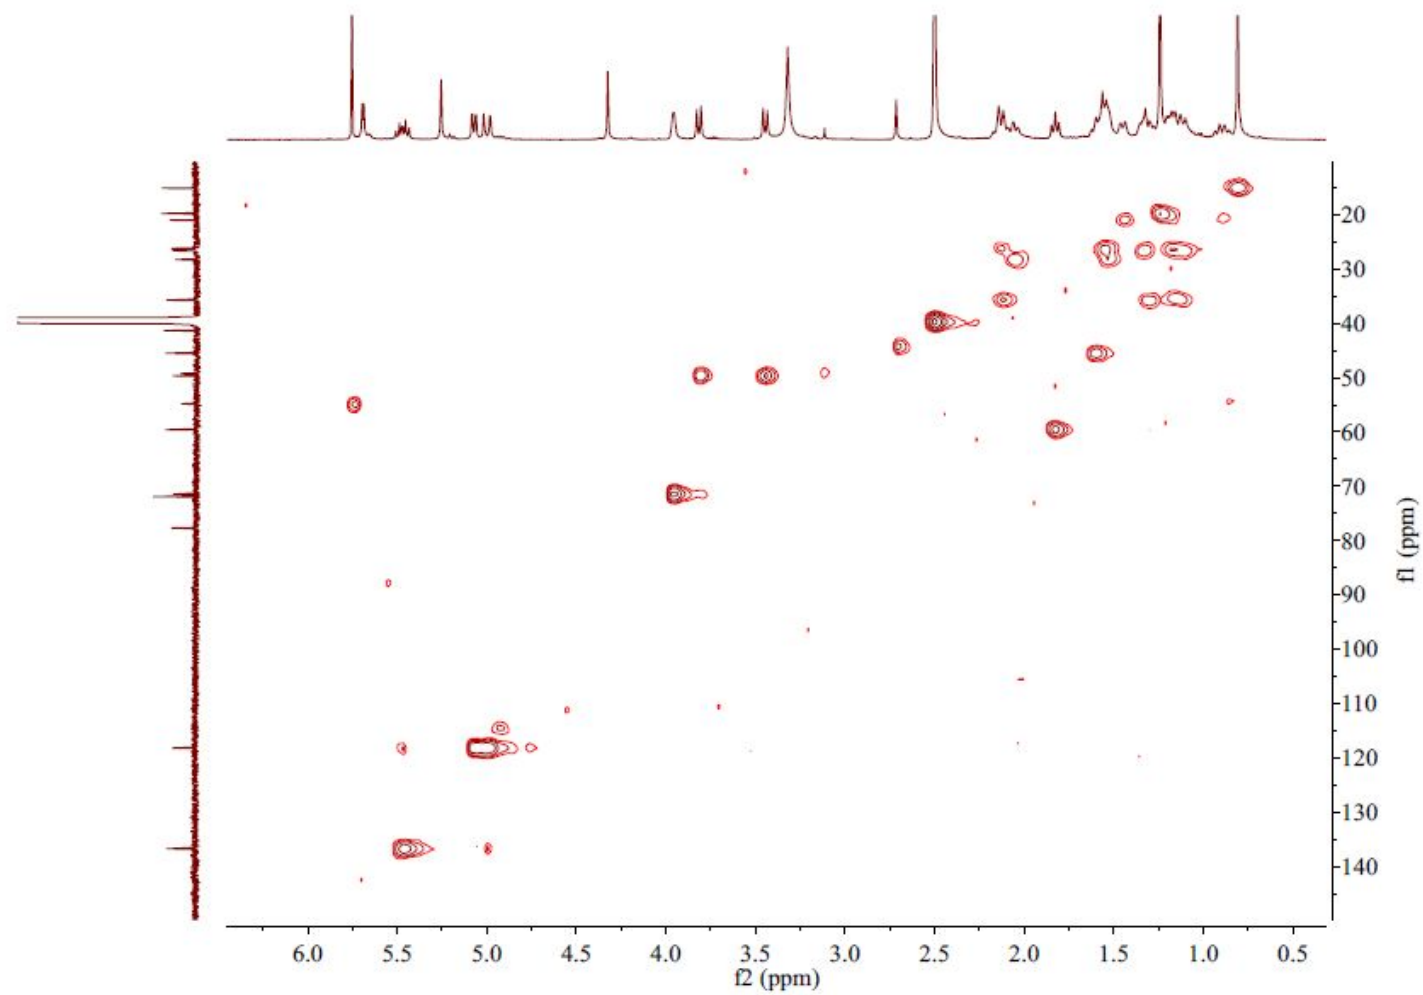

**Figure S5.** HMBC spectrum of compound **1**

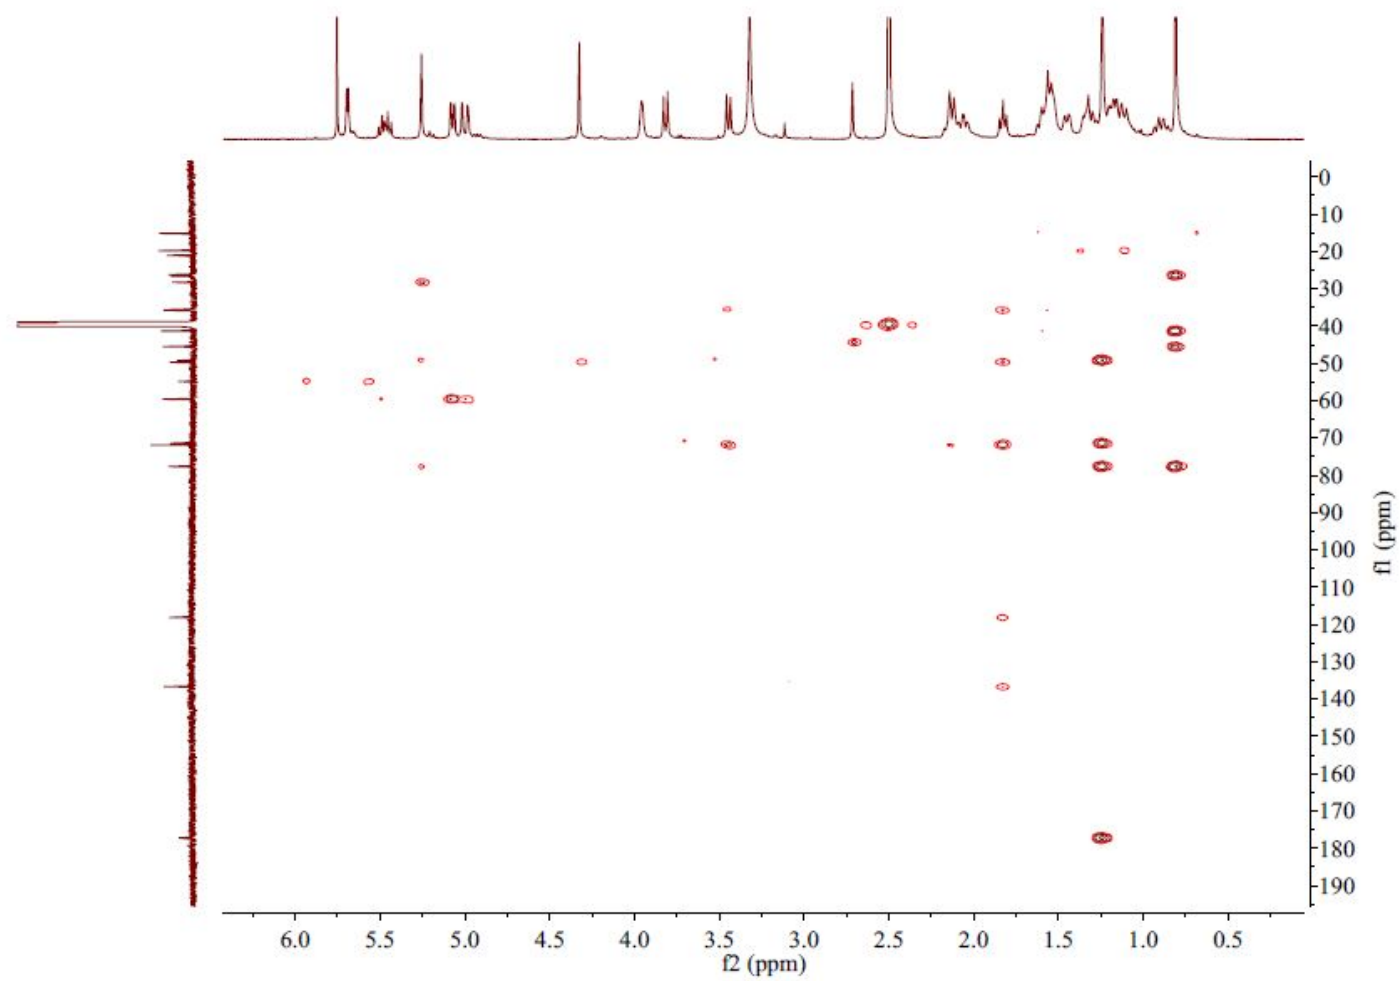



**Figure S6.** NOESY spectrum of compound **1**

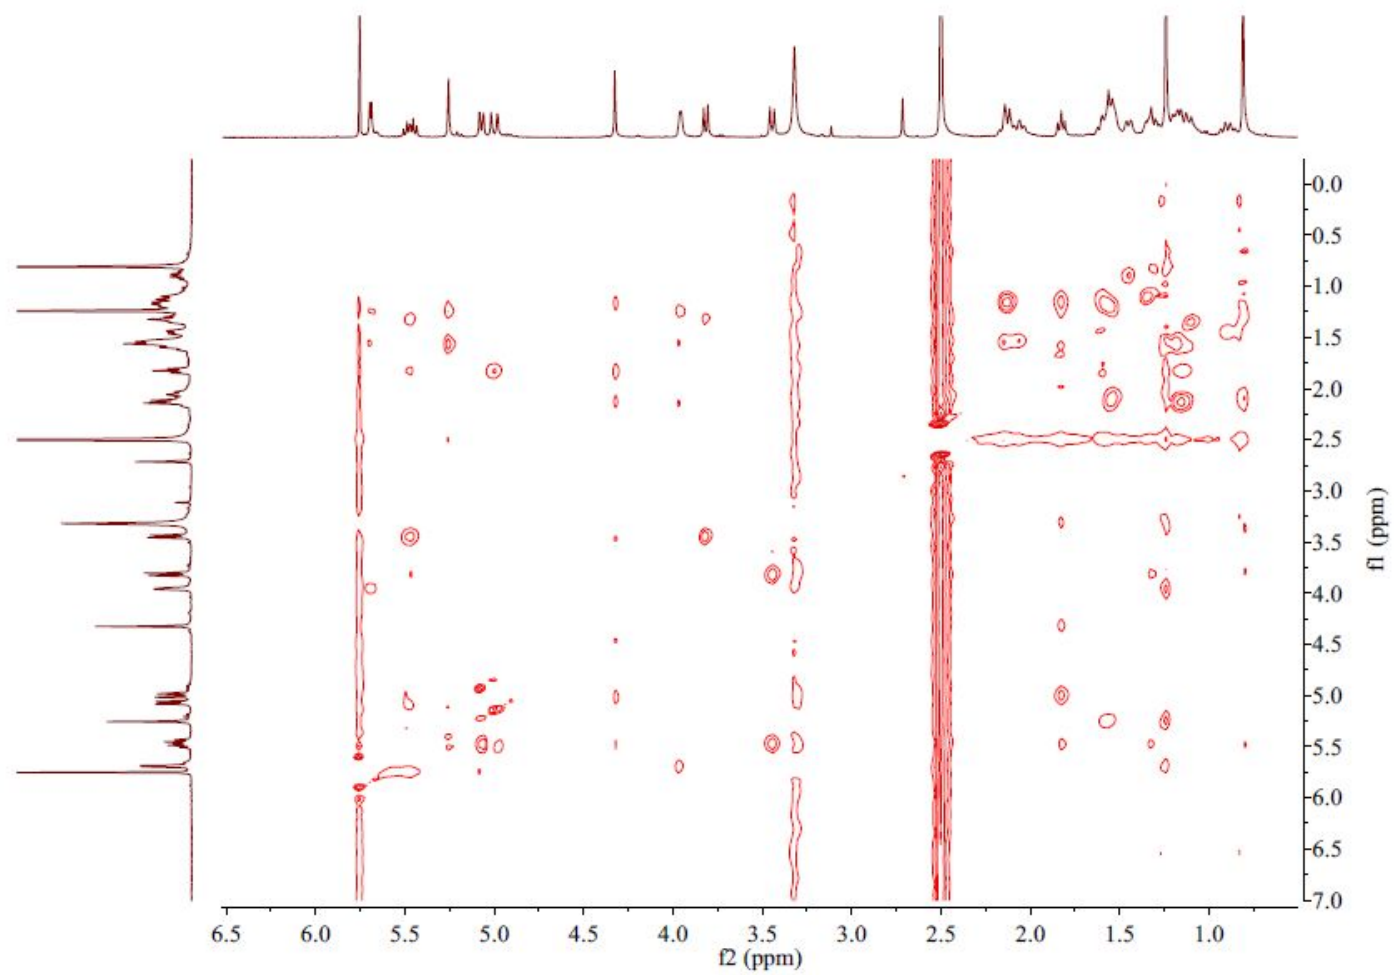

**Figure S7.** ECD spectrum of compound **1**

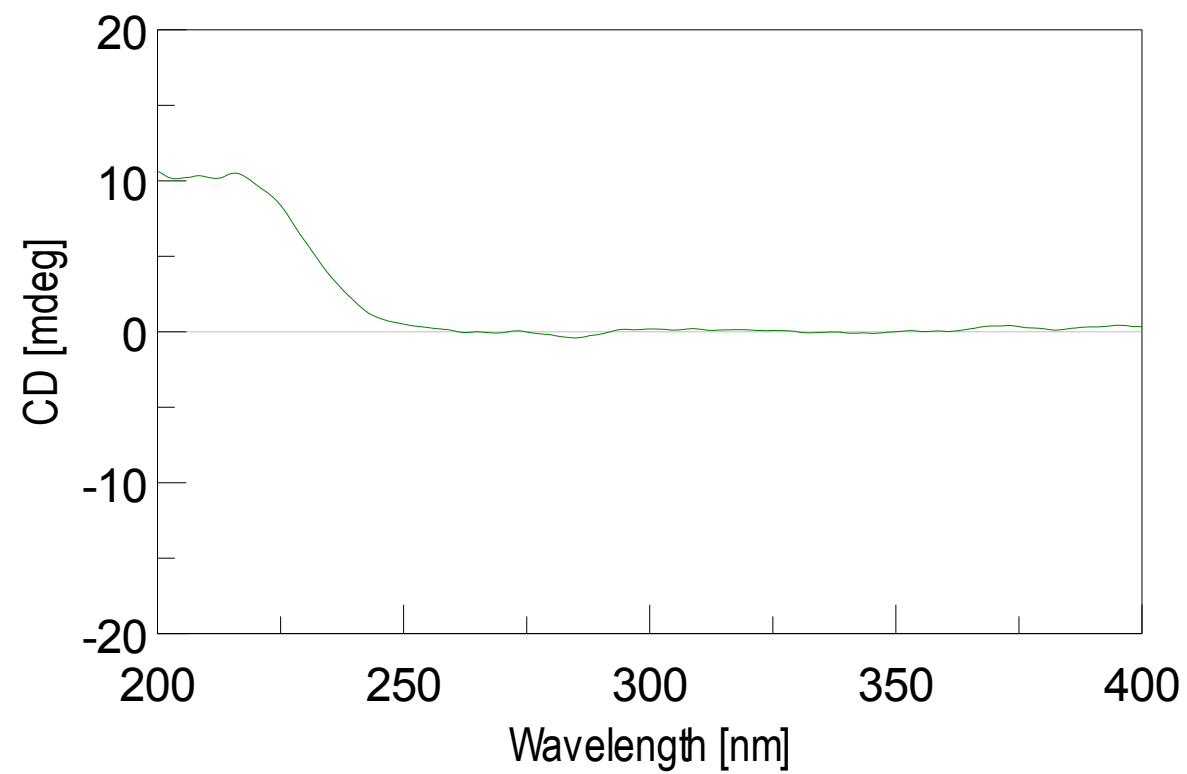

**Figure S8.**  $^1\text{H}$  NMR (500 MHz,  $\text{DMSO}-d_6$ ) spectrum of compound **2**

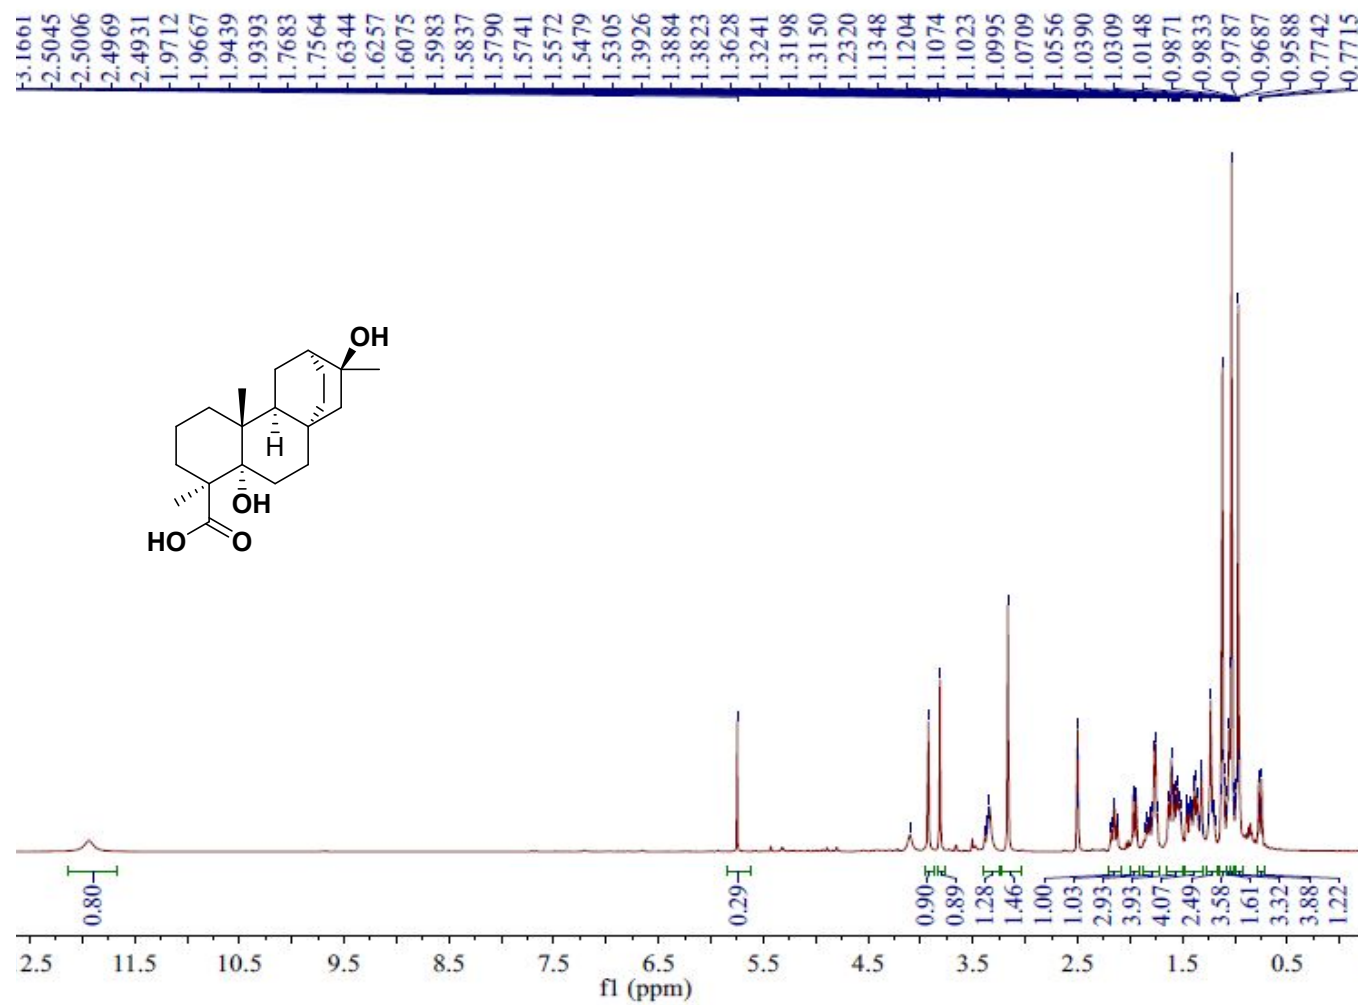

**Figure S9.**  $^{13}\text{C}$  NMR (125 MHz,  $\text{DMSO-}d_6$ ) and DEPT spectra of compound **2**

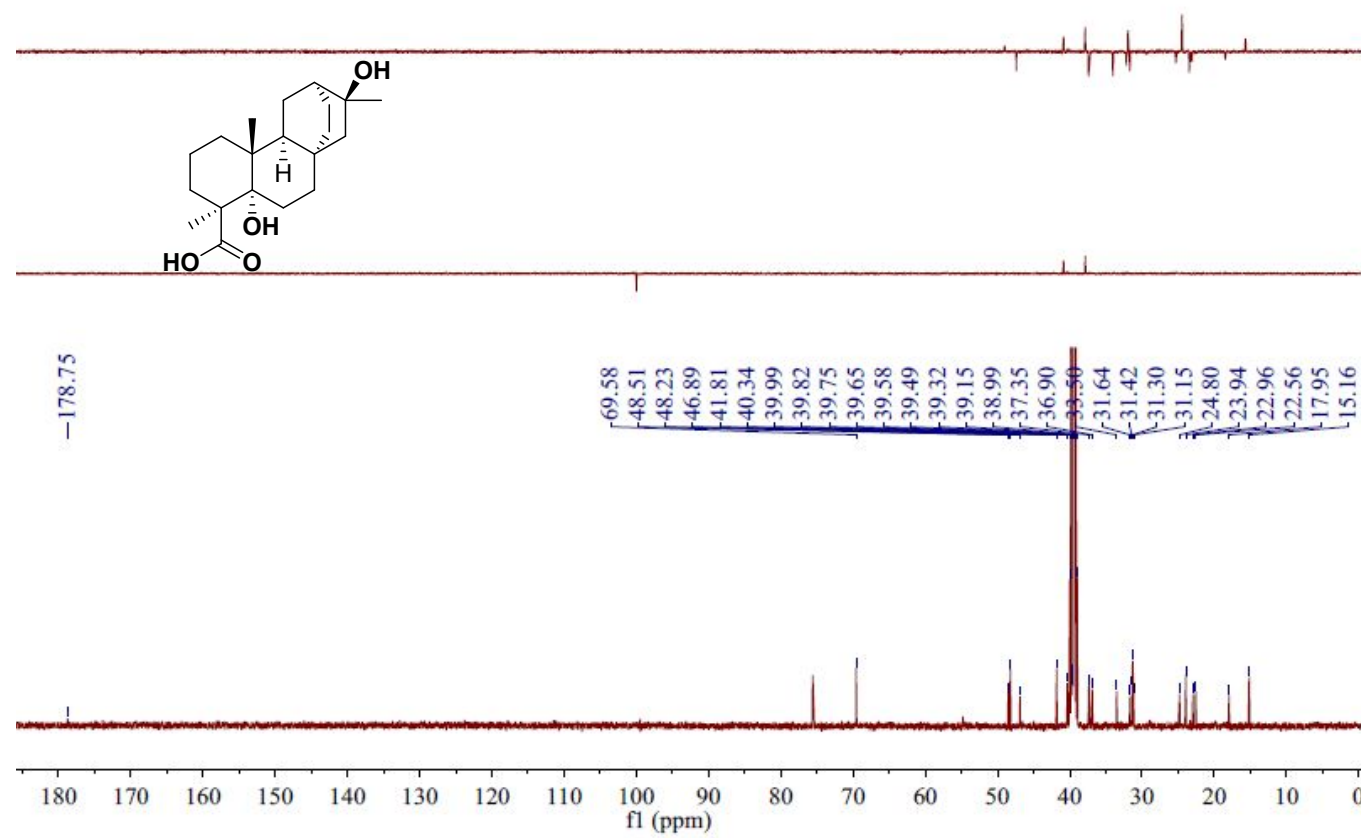

**Figure S10.** COSY spectrum of compound **2**

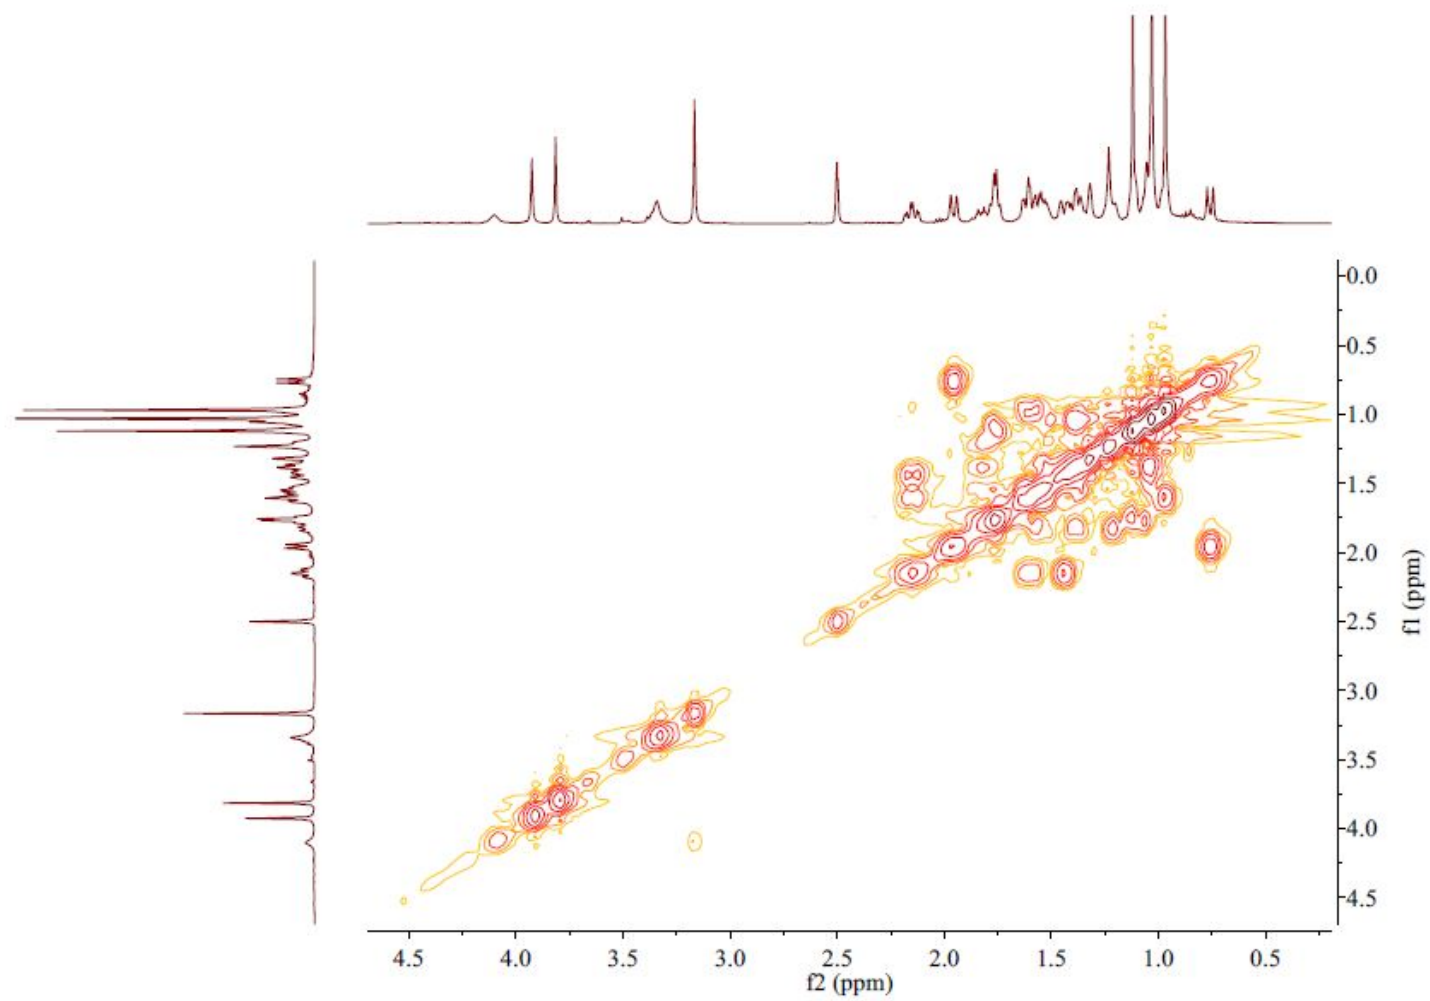

**Figure S11.** HSQC spectrum of compound **2**

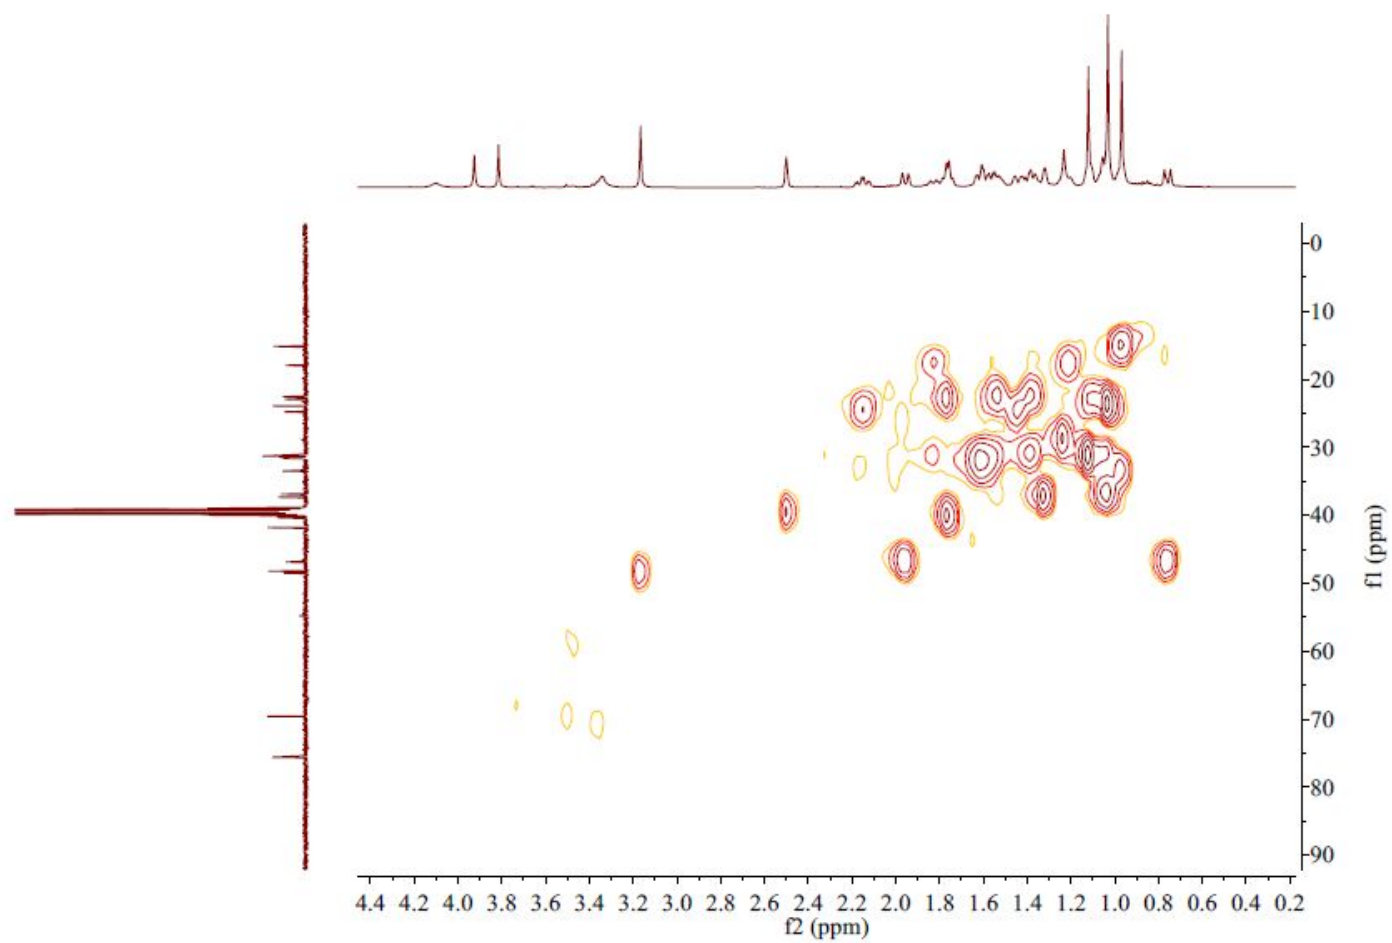

**Figure S12.** HMBC spectrum of compound **2**

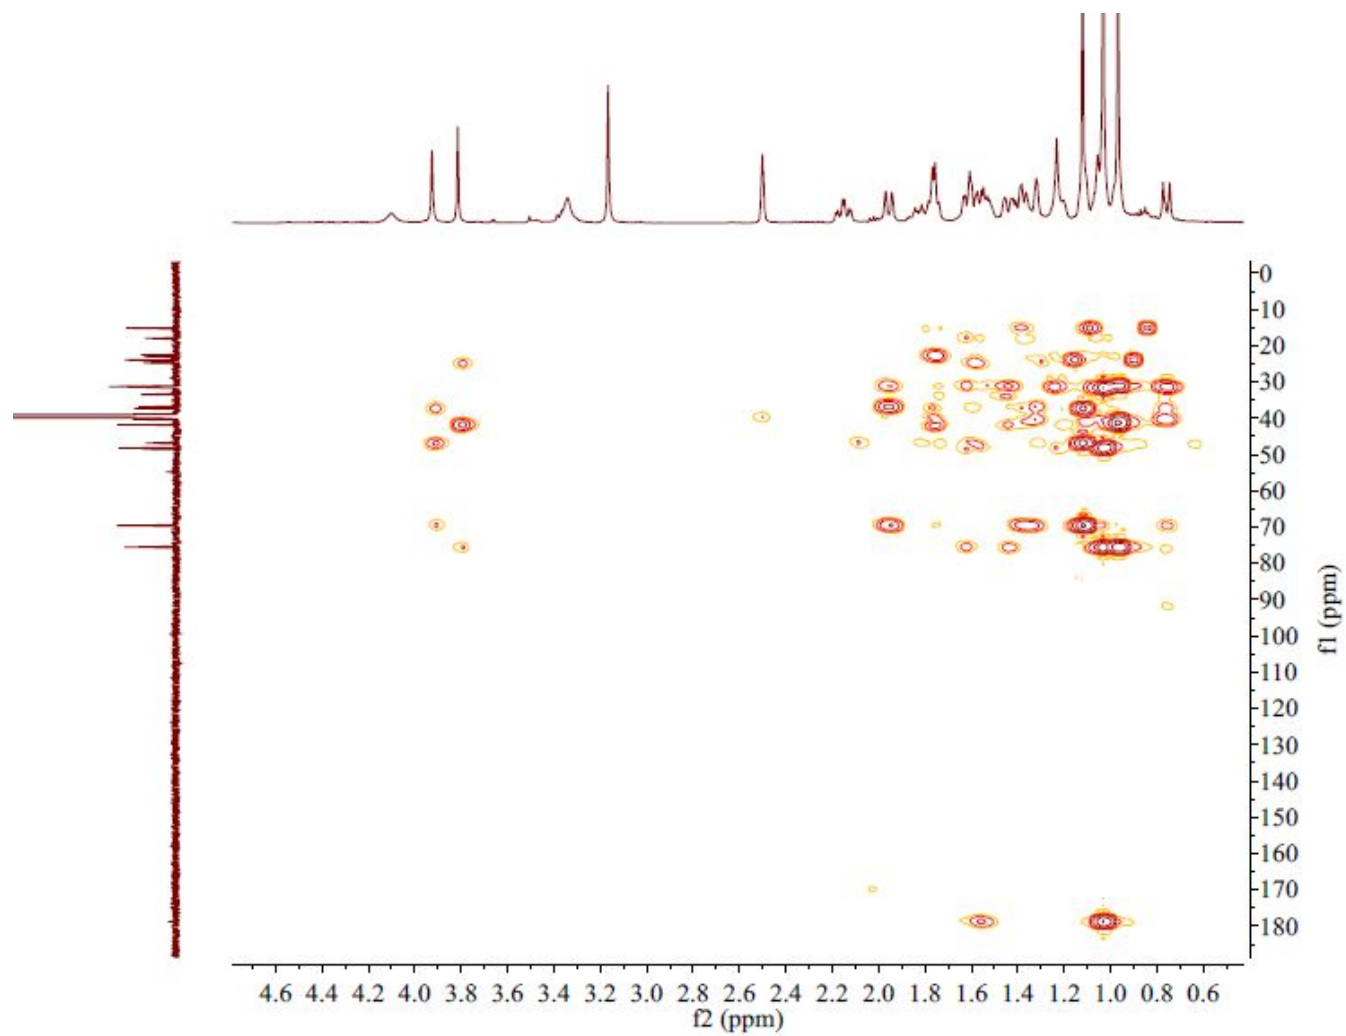

**Figure S13.** NOESY spectrum of compound **2**

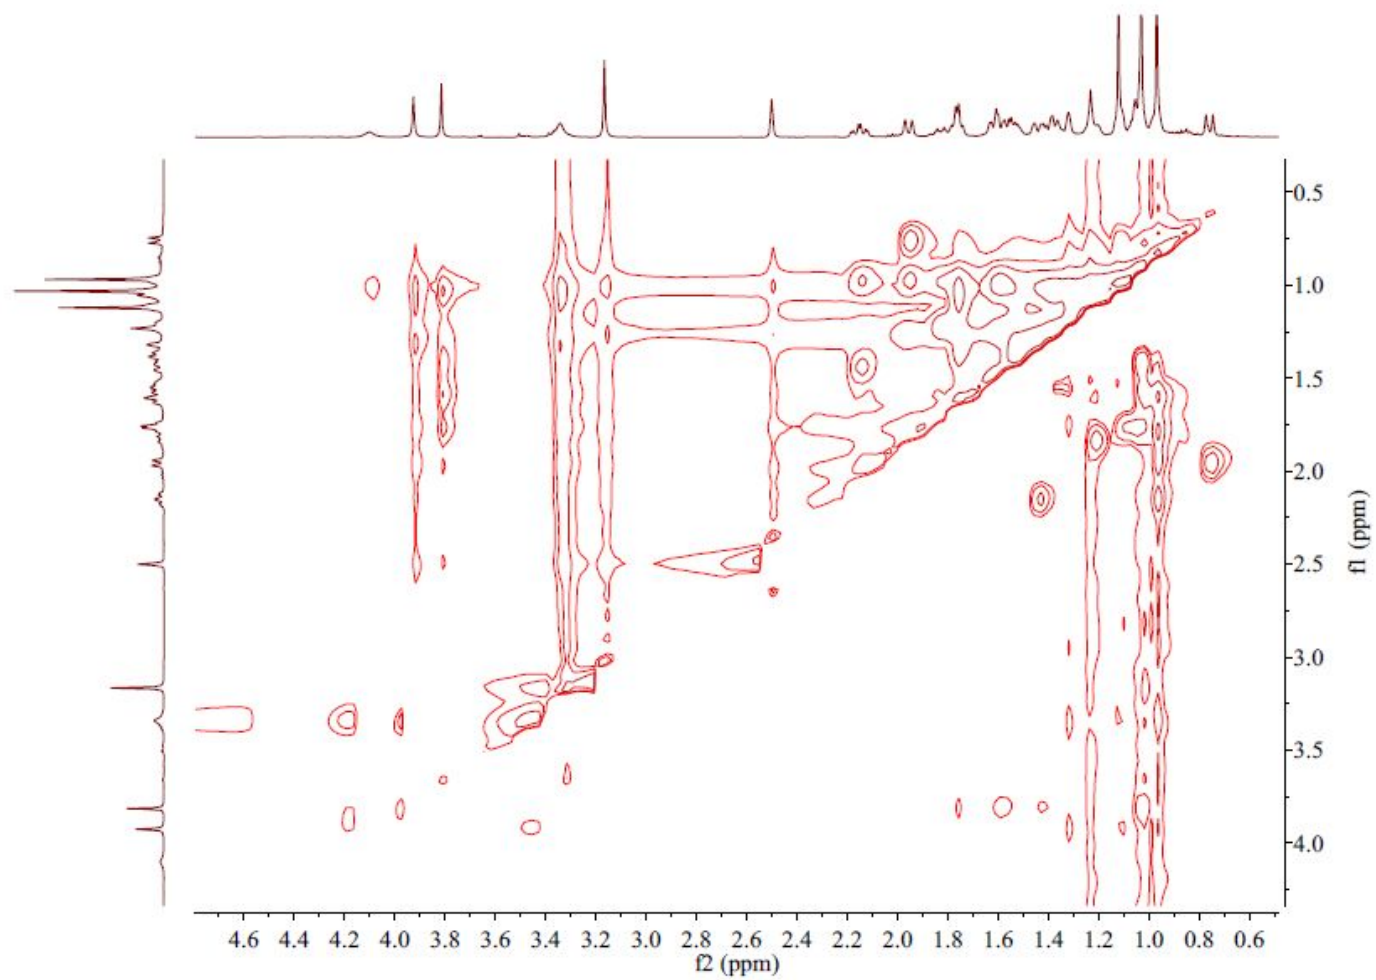



**Figure S14.** ECD spectrum of compound **2**

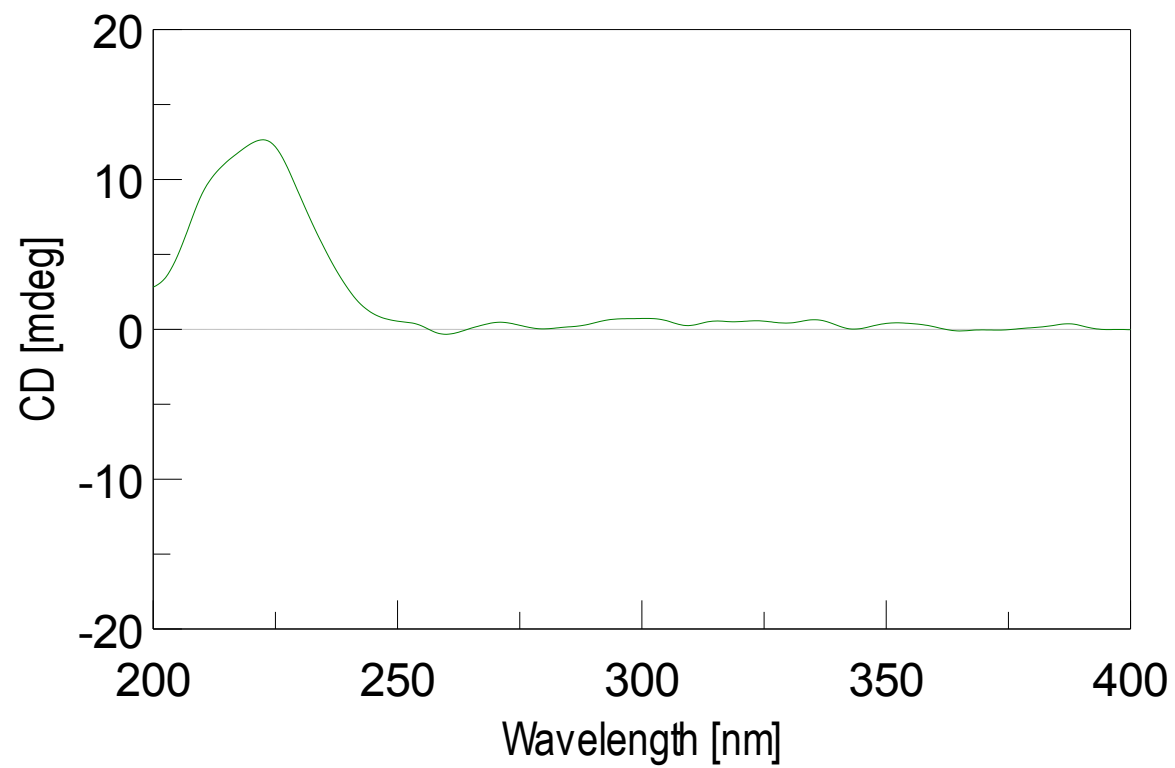

**Figure S15.**  $^1\text{H}$  NMR (500 MHz,  $\text{DMSO}-d_6$ ) spectrum of compound **3**

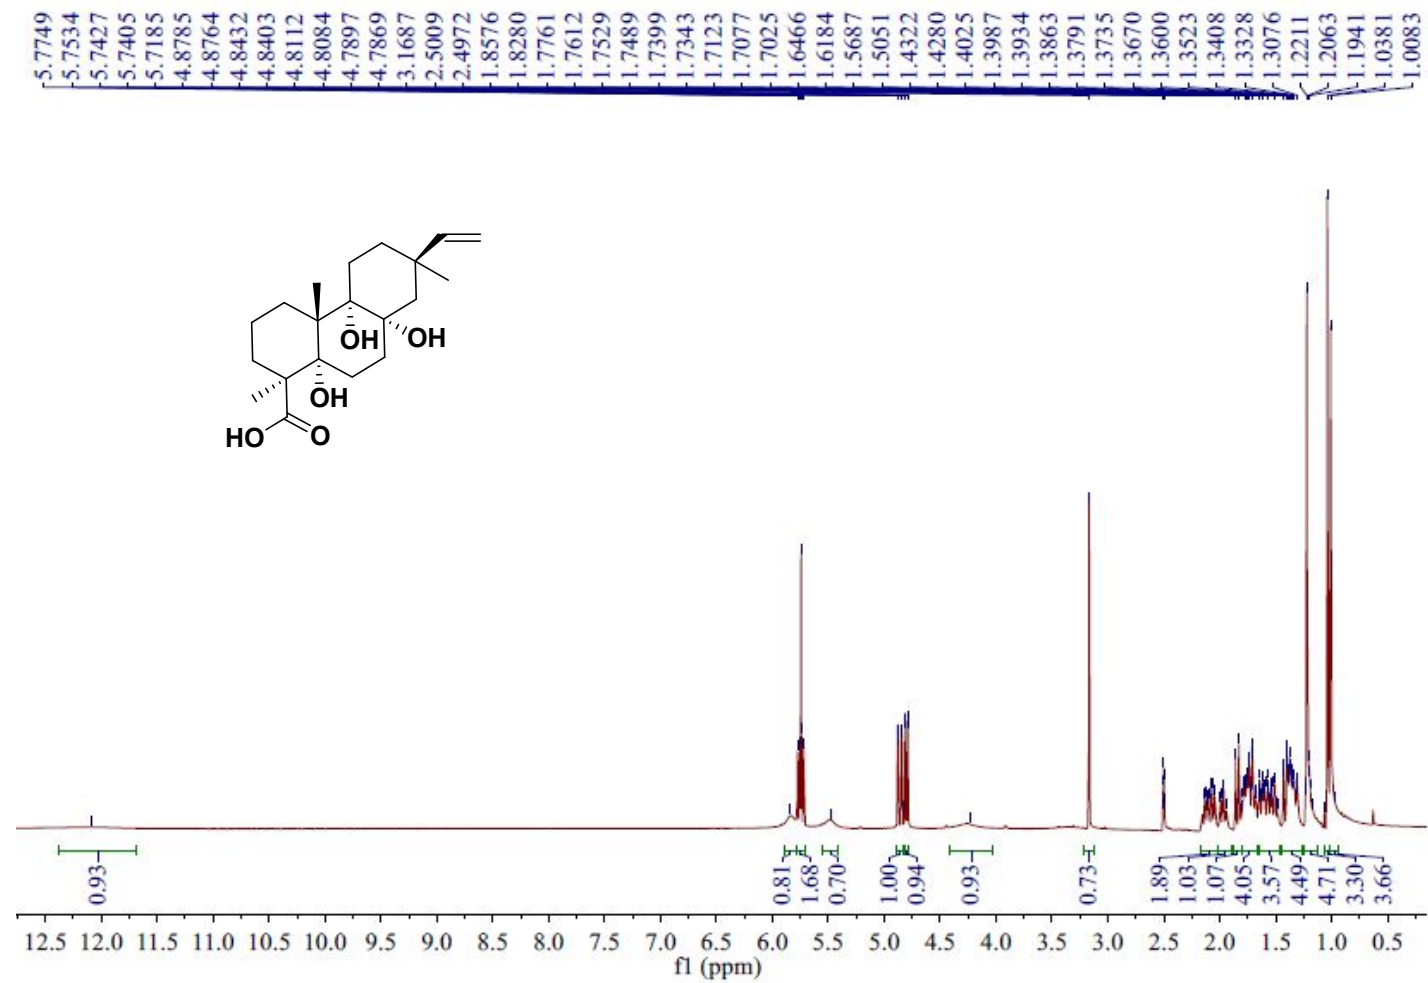

**Figure S16.**  $^{13}\text{C}$  NMR (125 MHz,  $\text{DMSO-}d_6$ ) and DEPT spectra of compound **3**

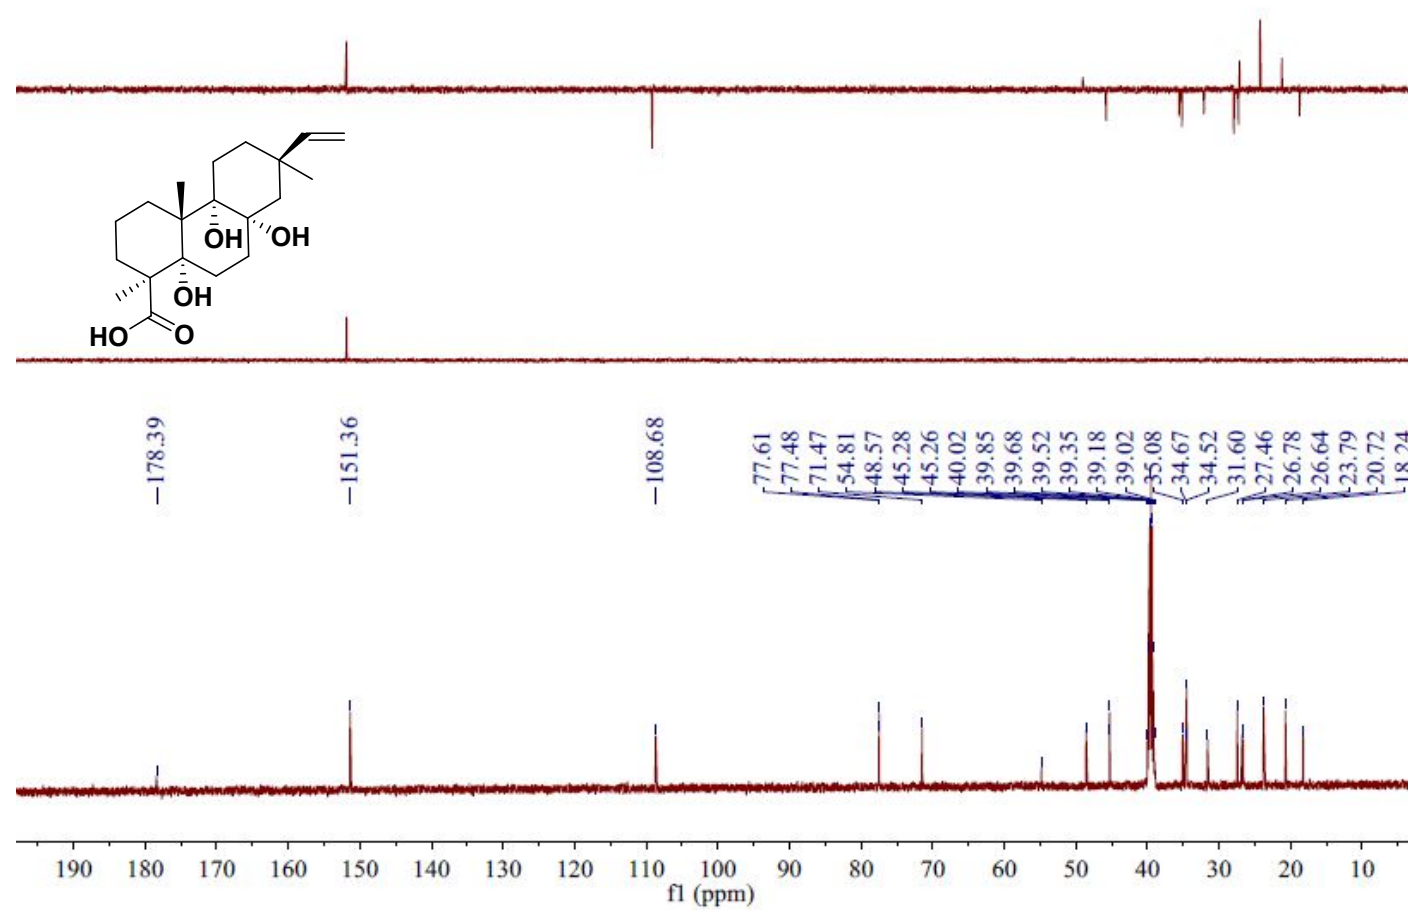

**Figure S17.** COSY spectrum of compound **3**

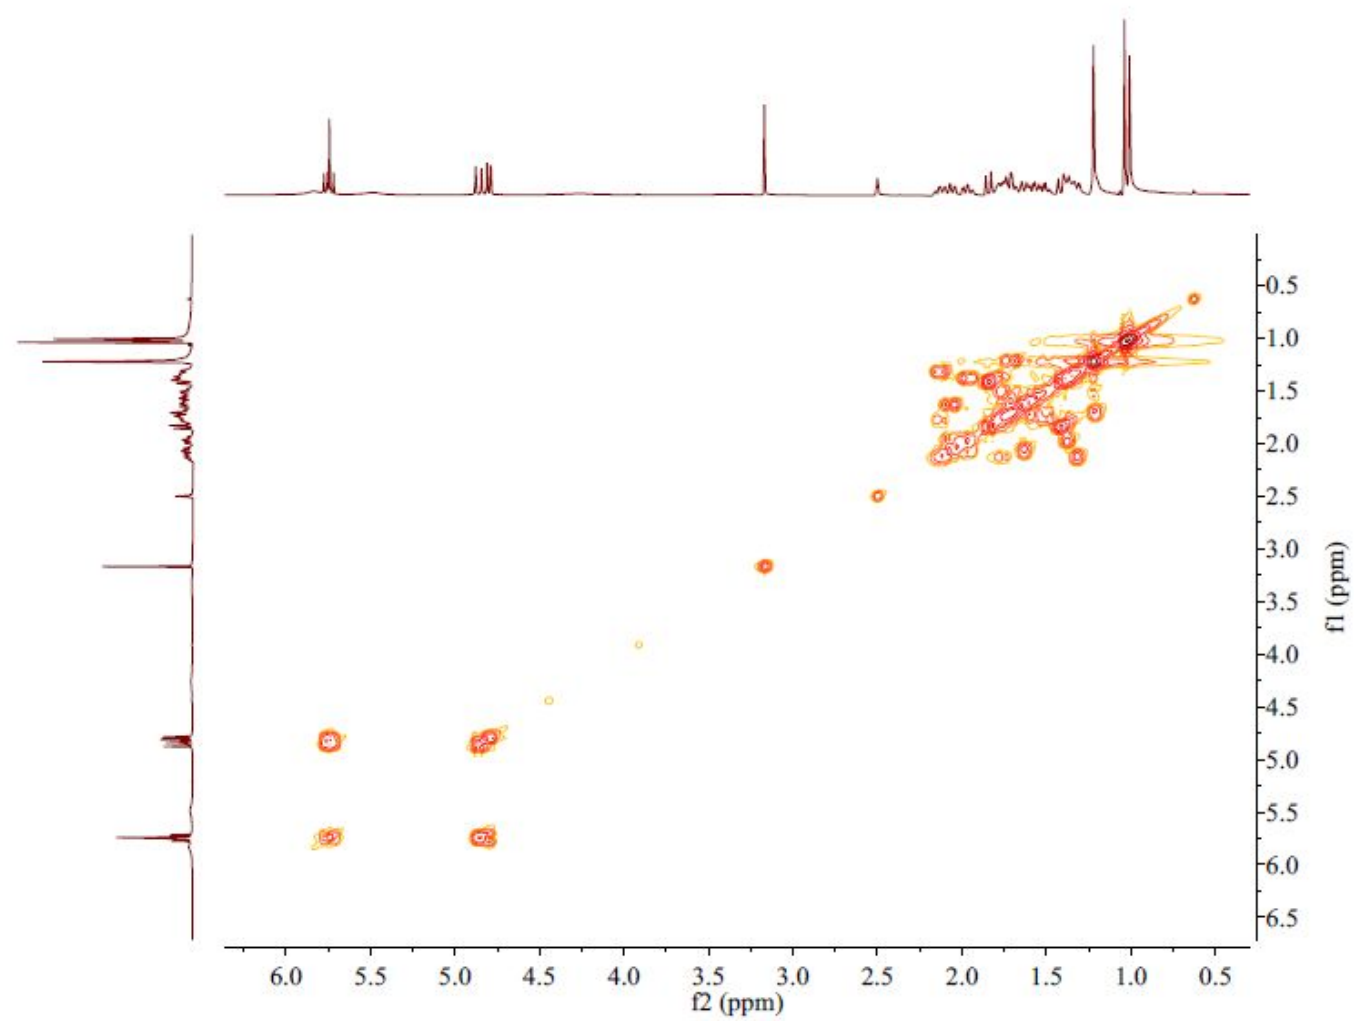

**Figure S18.** HSQC spectrum of compound **3**

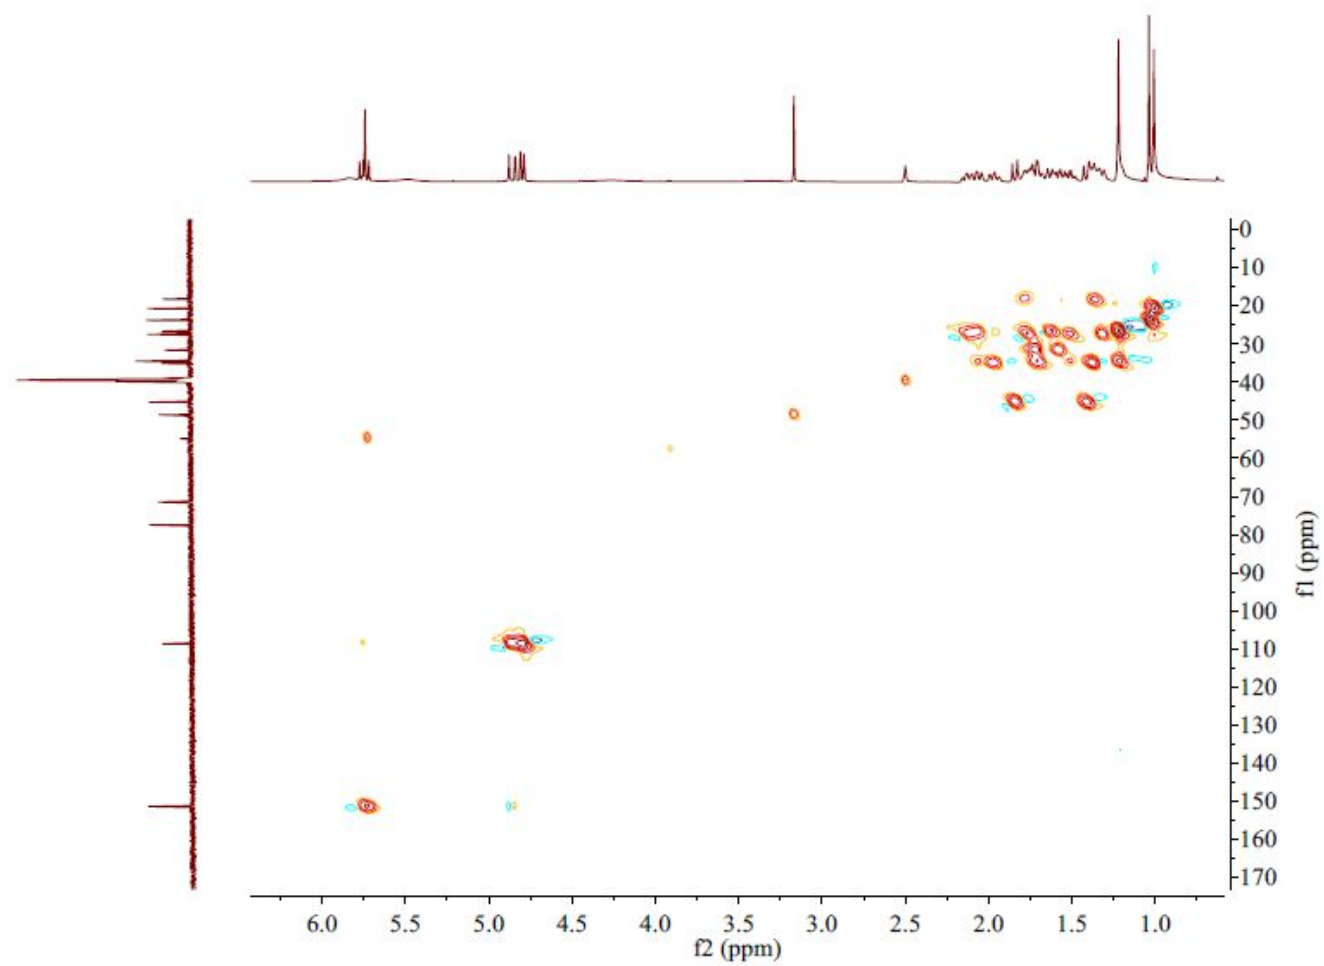

**Figure S19.** HMBC spectrum of compound **3**

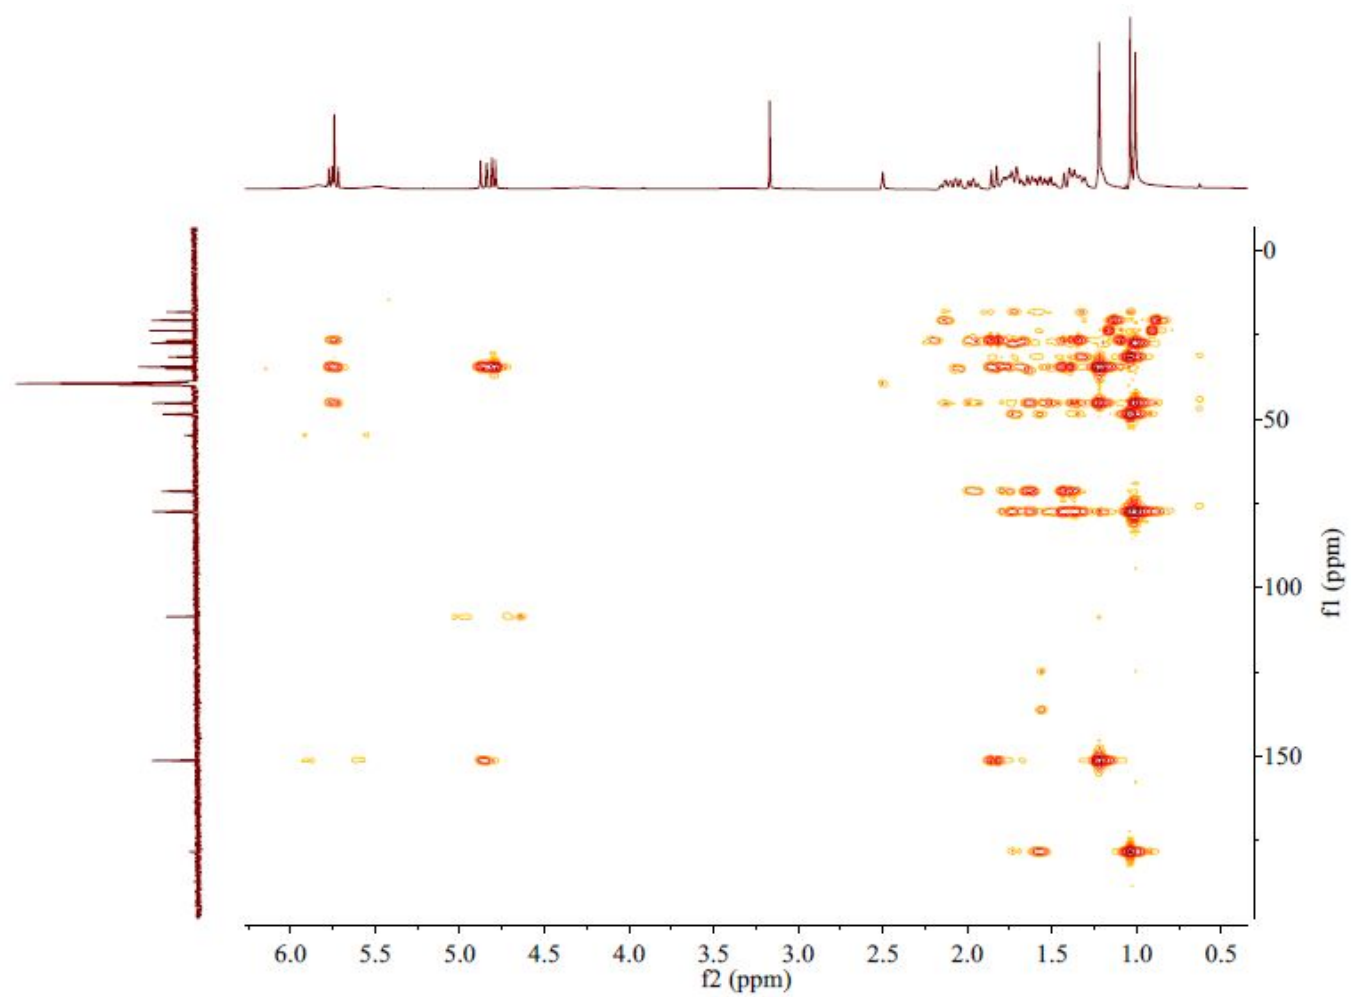

**Figure S20.** NOESY spectrum of compound **3**

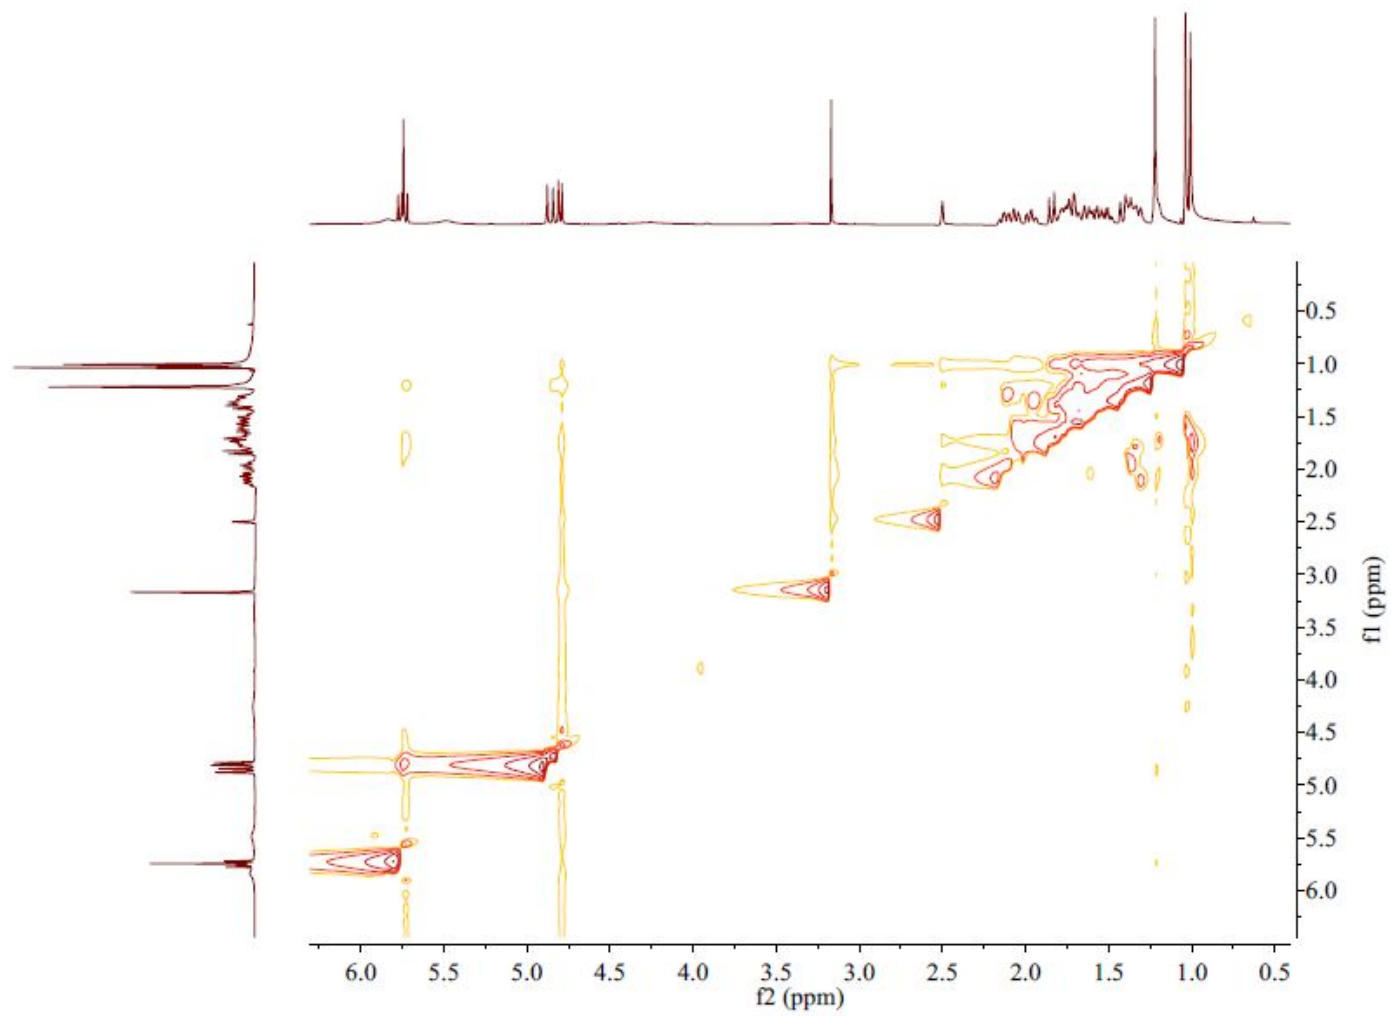

**Figure S21.** ECD spectrum of compound **3**

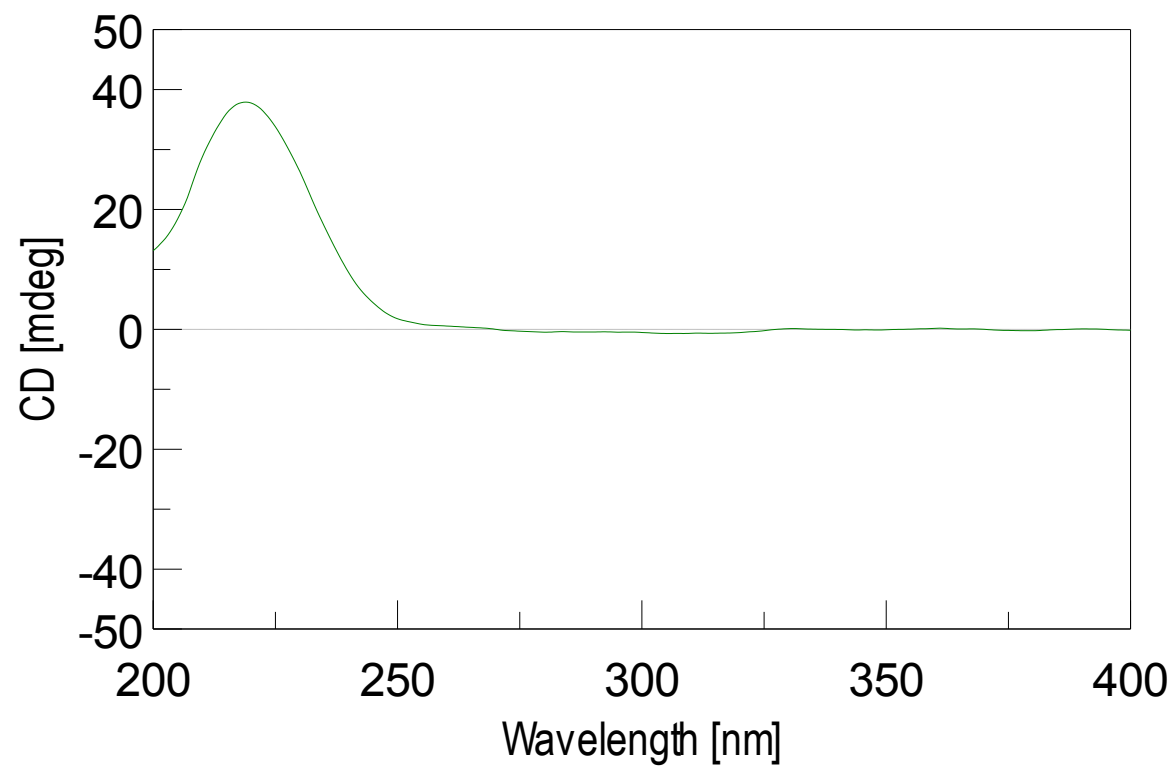



**Figure S22.**  $^1\text{H}$  NMR (500 MHz,  $\text{DMSO}-d_6$ ) spectrum of compound **4**

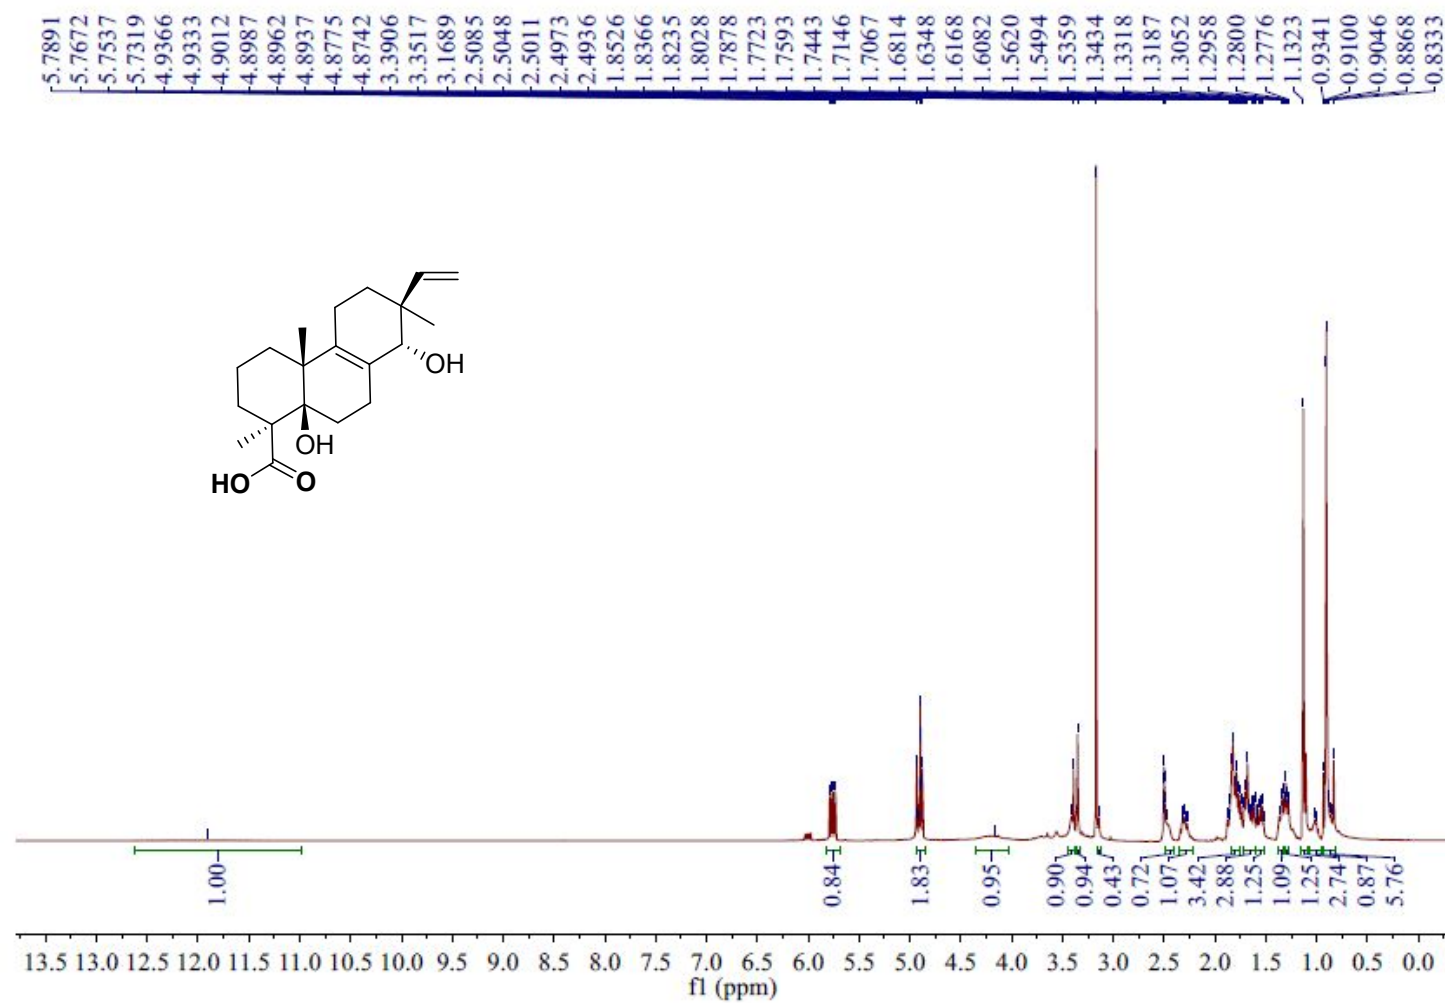

**Figure S23.**  $^{13}\text{C}$  NMR (125 MHz,  $\text{DMSO-}d_6$ ) and DEPT spectra of compound **4**

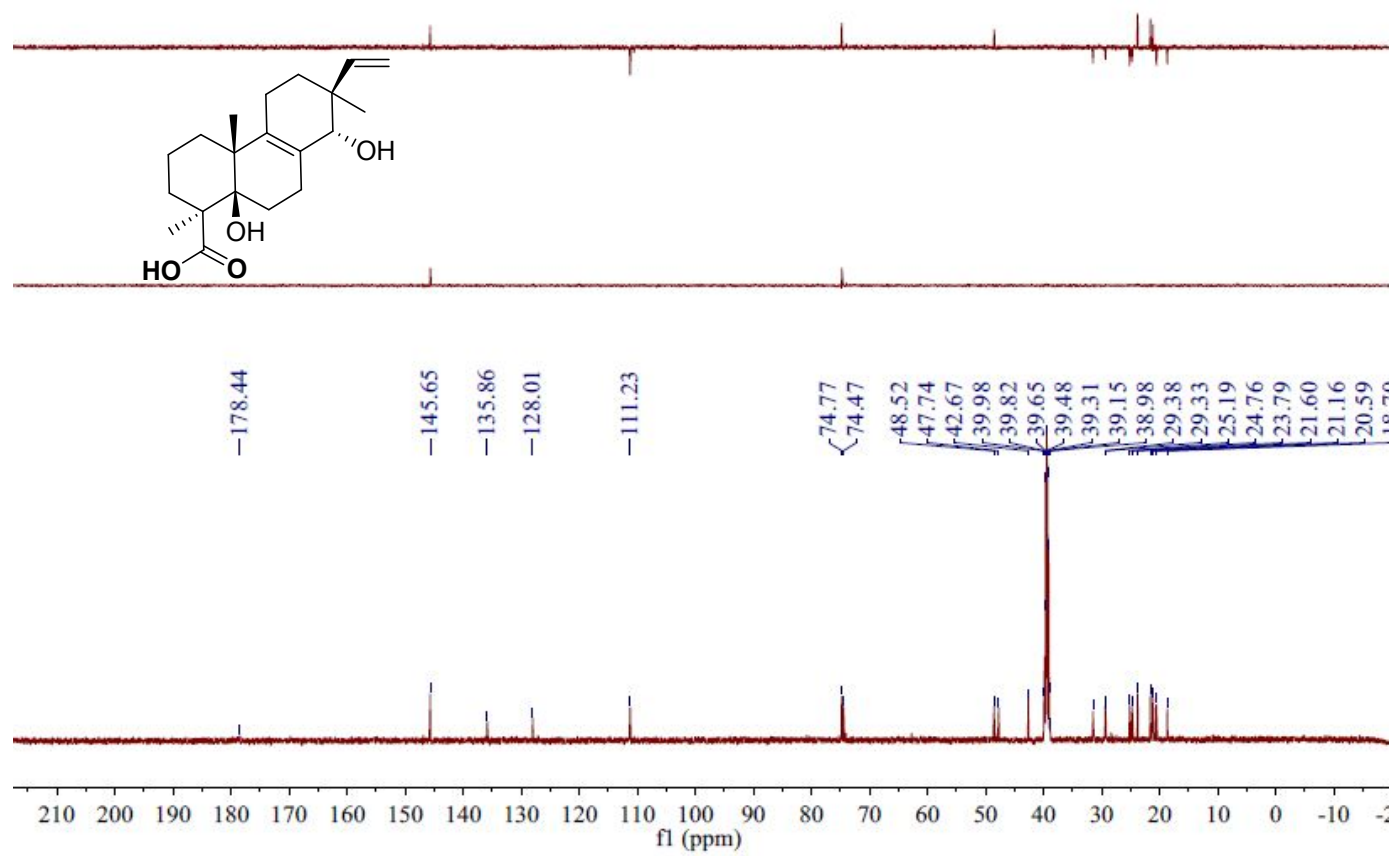

**Figure S24.** COSY spectrum of compound **4**

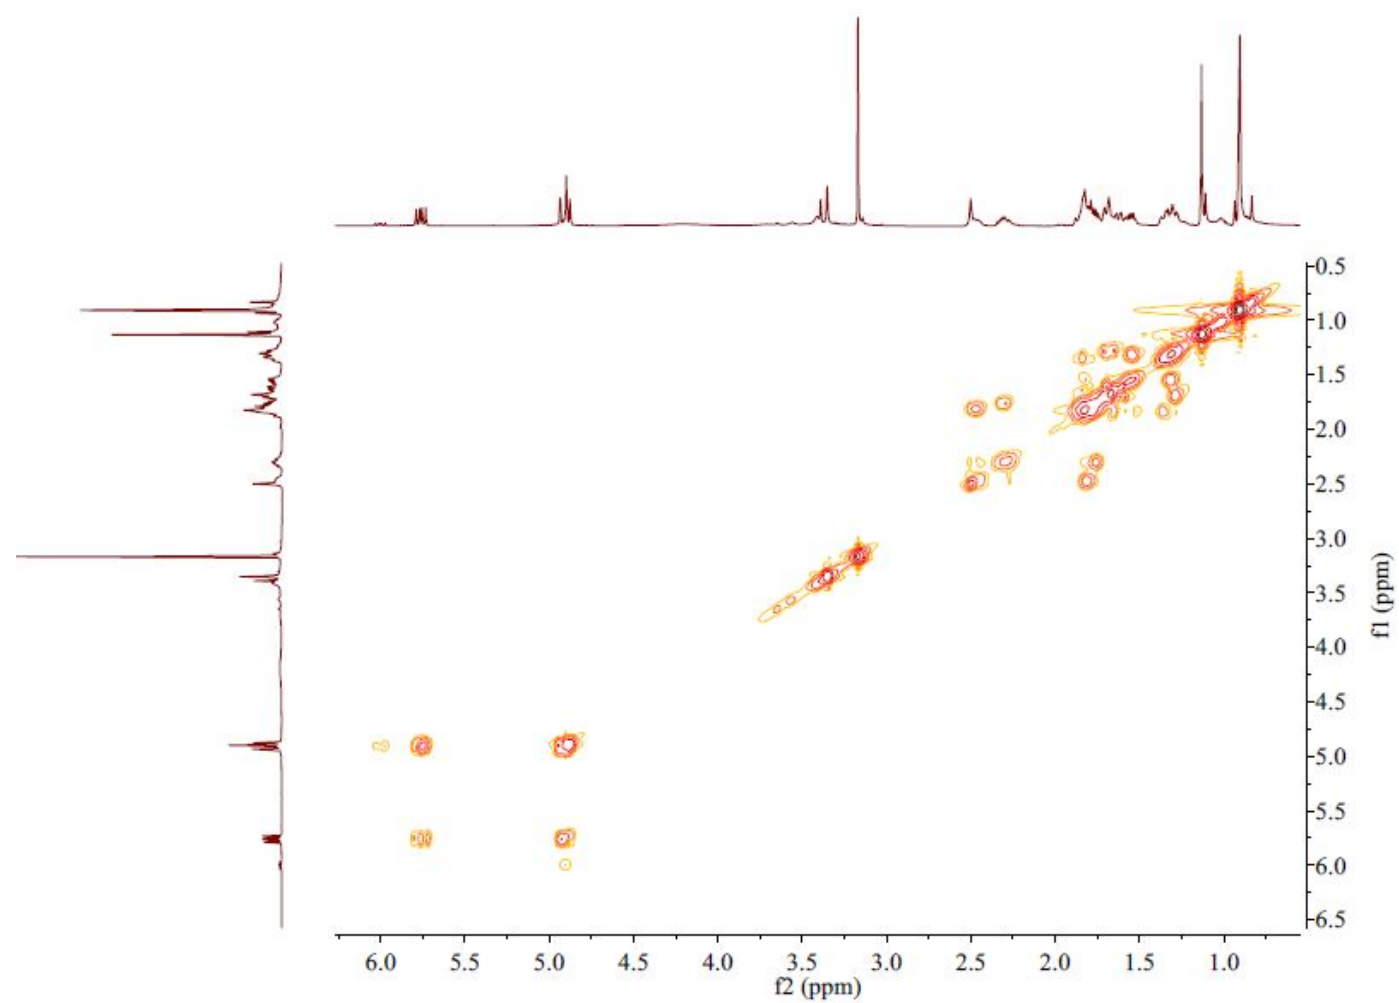

**Figure S25.** HSQC spectrum of compound **4**

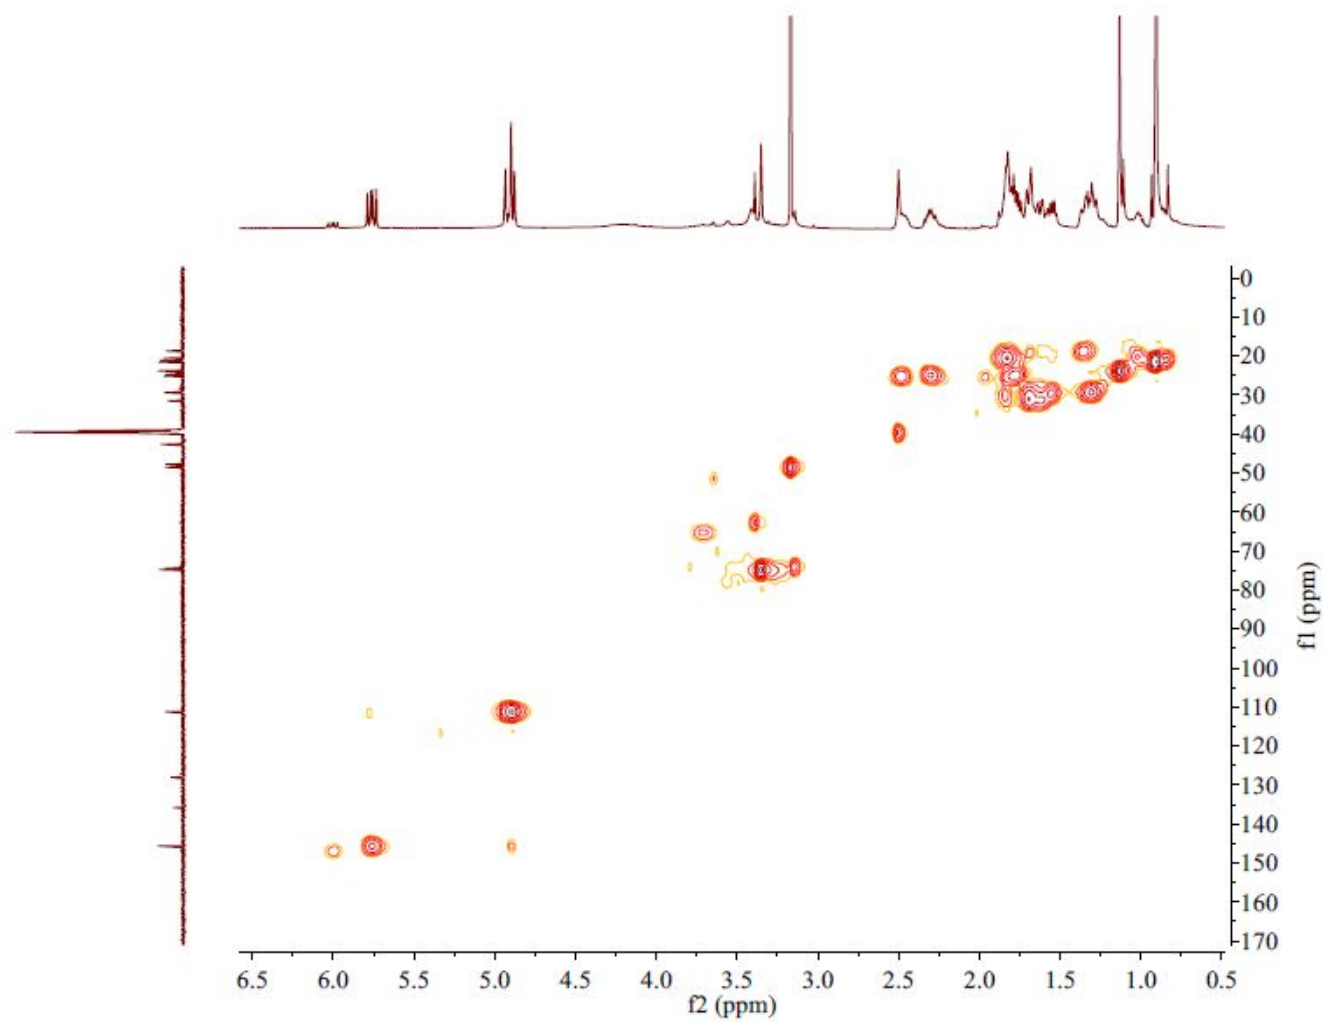

**Figure S26.** HMBC spectrum of compound **4**

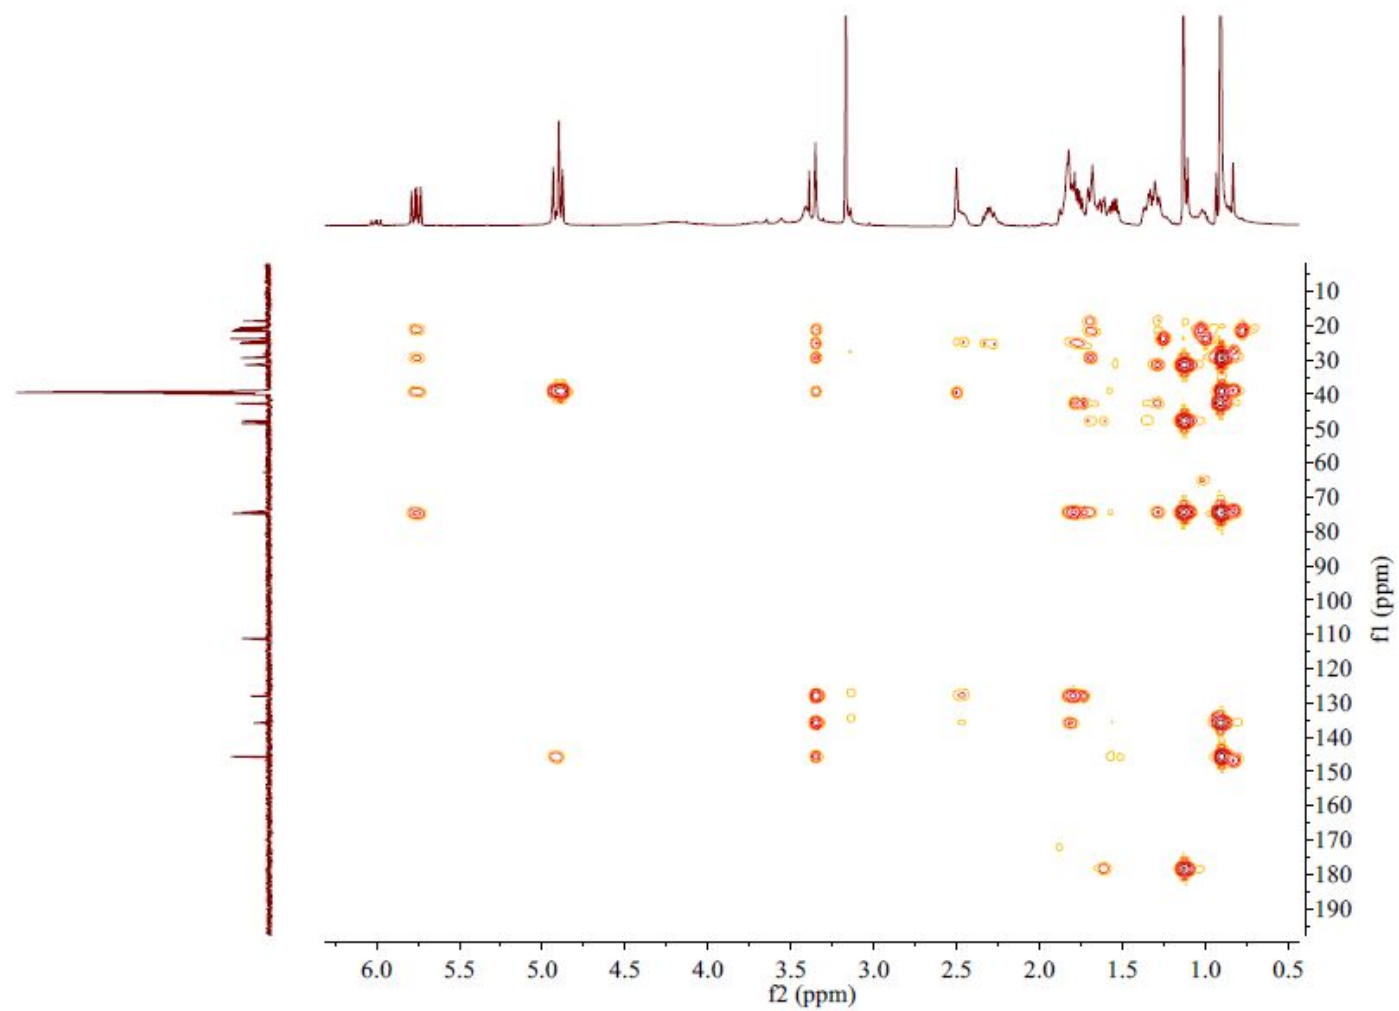

**Figure S27.** NOESY spectrum of compound **4**

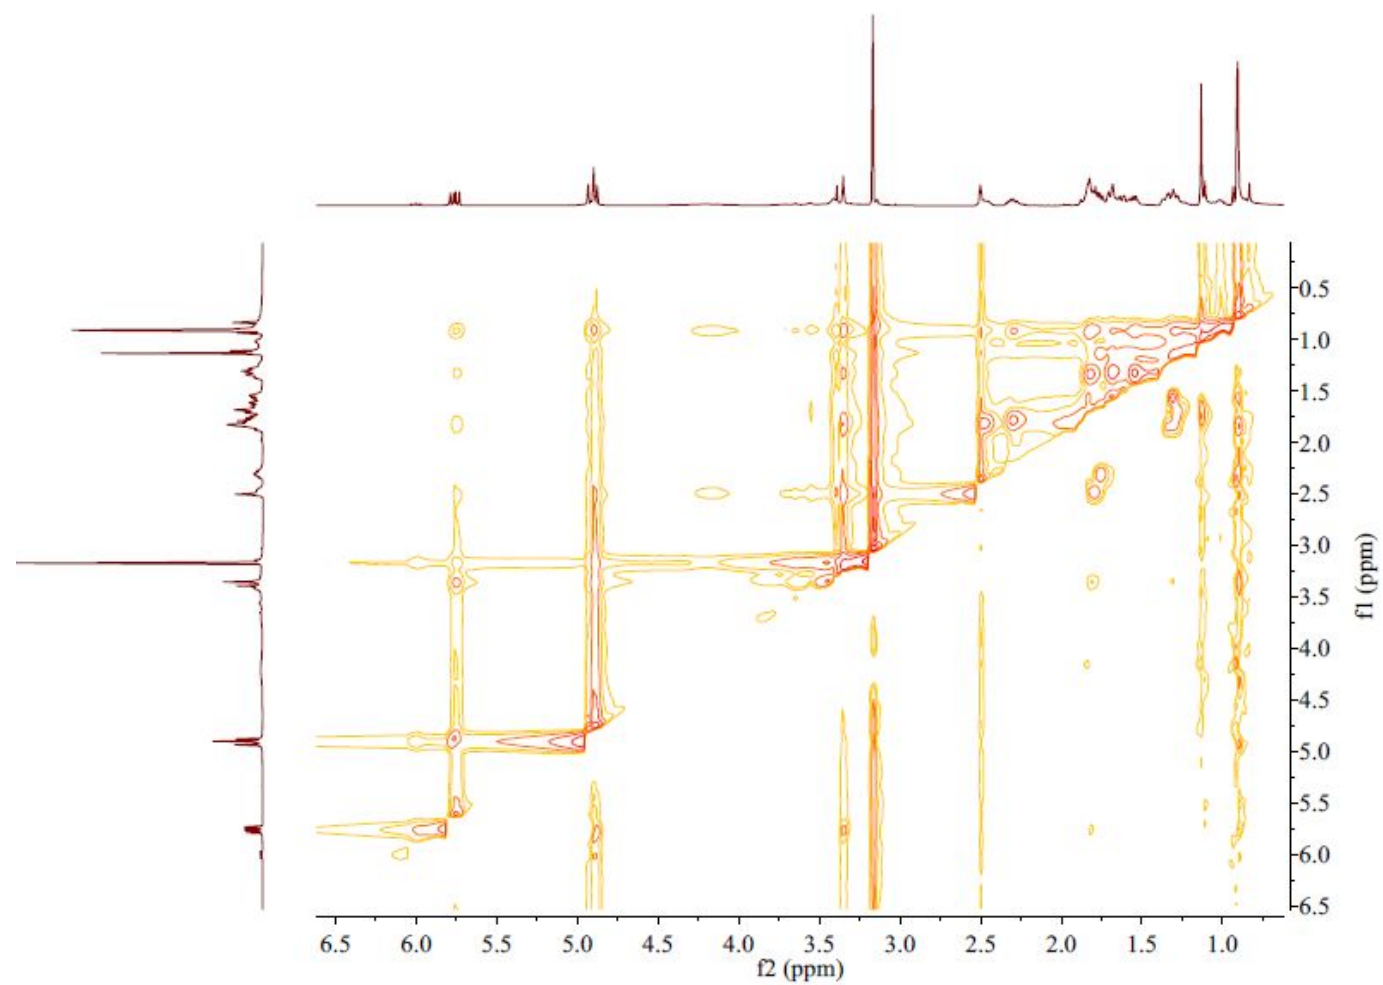

**Figure S28.** ECD spectrum of compound **4**

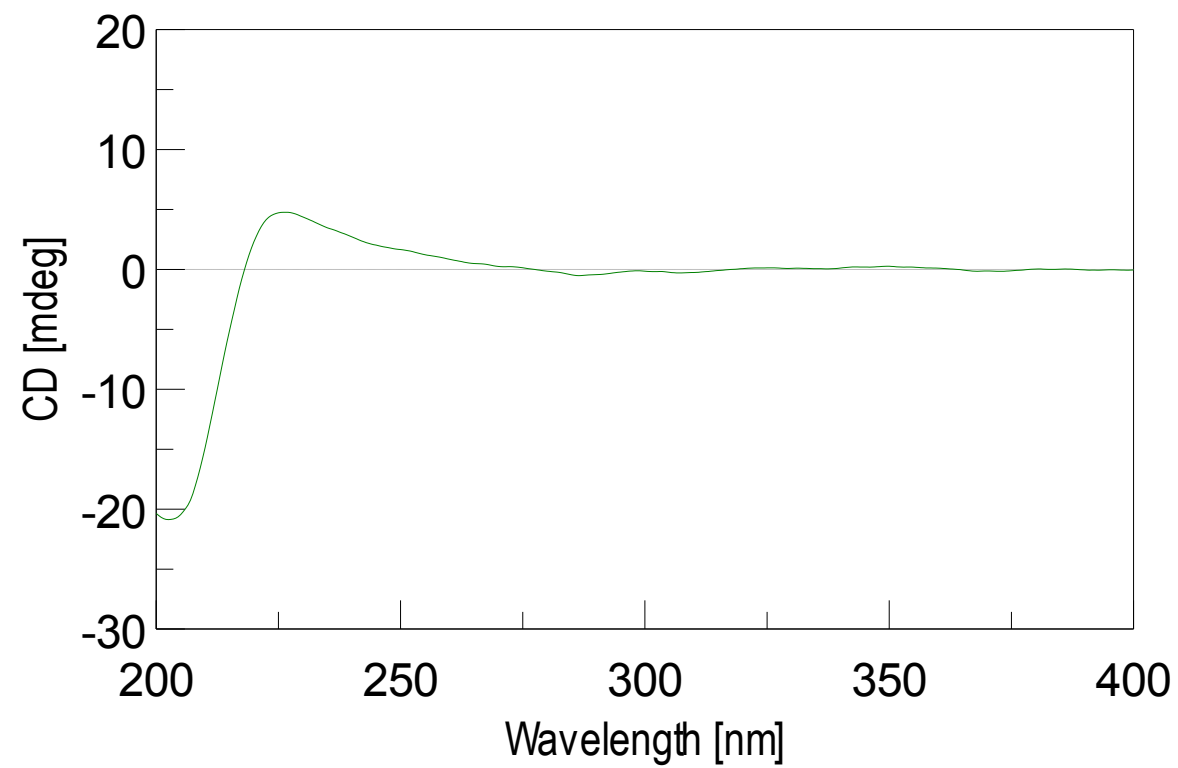

**Figure S29.**  $^1\text{H}$  NMR (600 MHz,  $\text{DMSO}-d_6$ ) spectrum of compound **5**

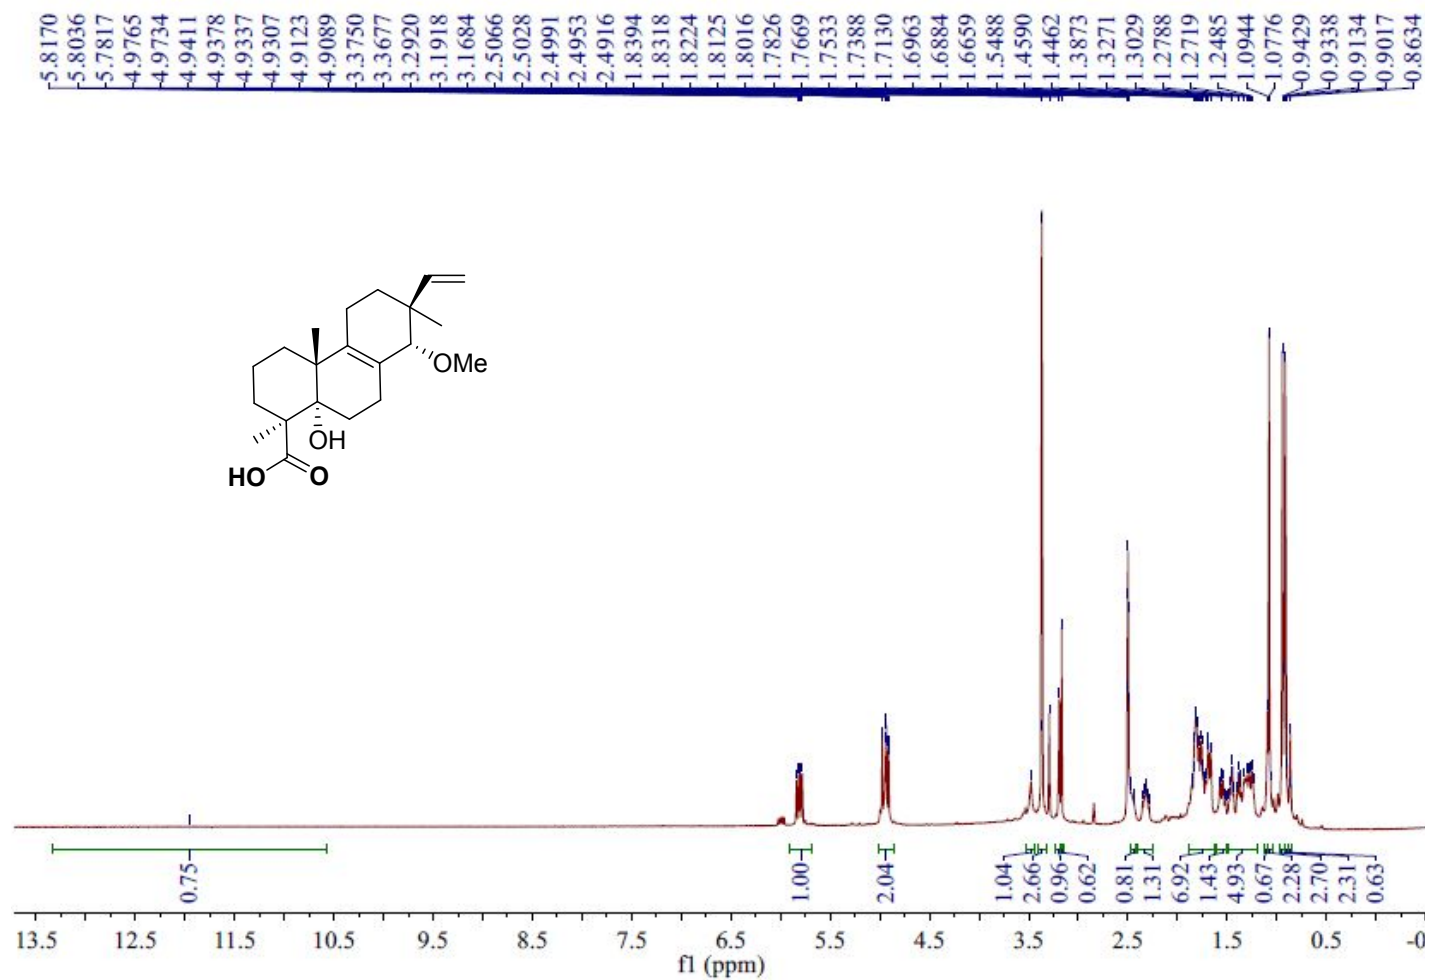



**Figure S30.**  $^{13}\text{C}$  NMR (150 MHz,  $\text{DMSO-}d_6$ ) and DEPT spectra of compound **5**

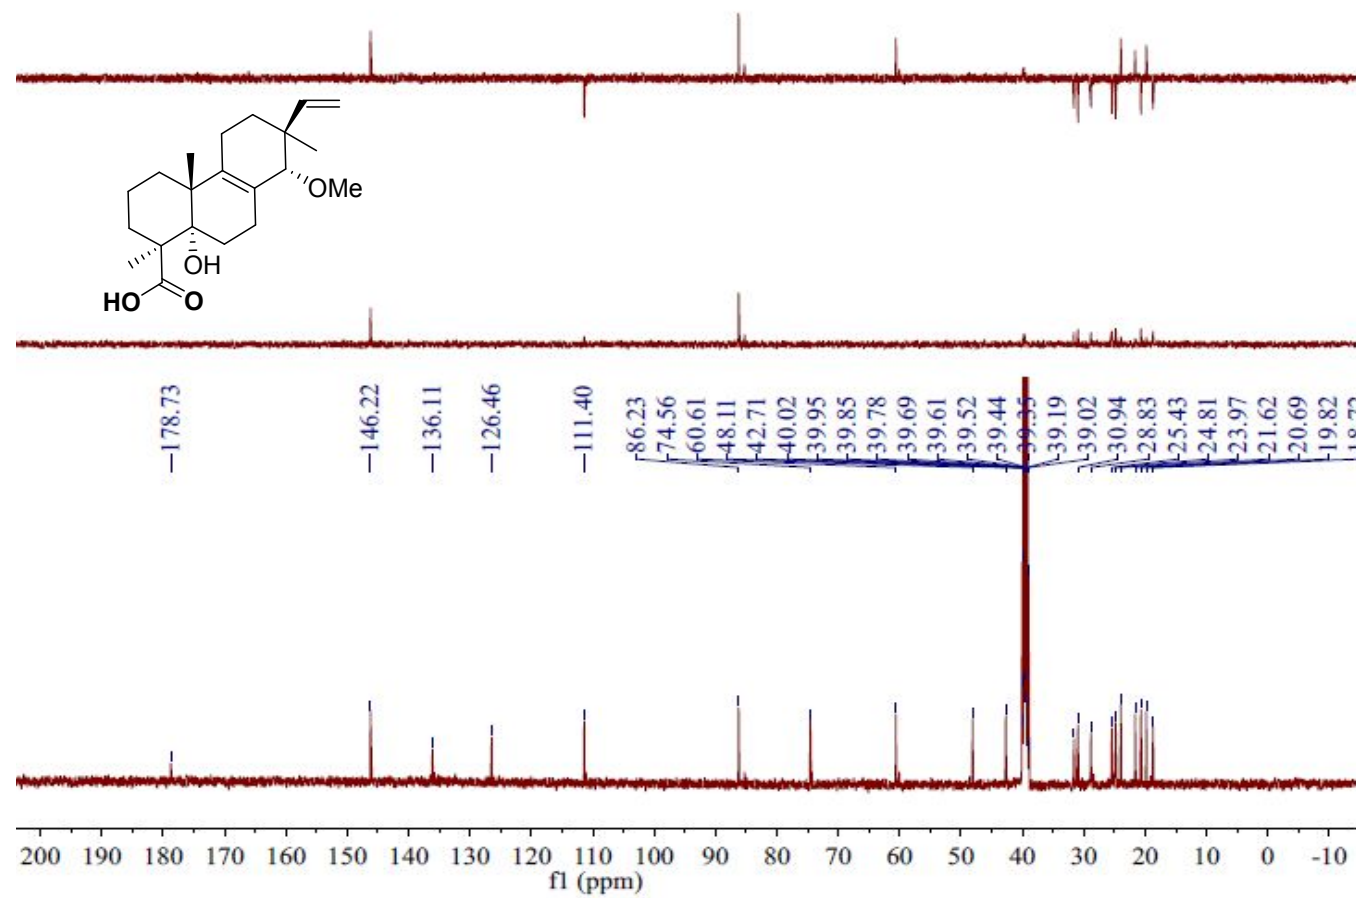

**Figure S31.** COSY spectrum of compound **5**

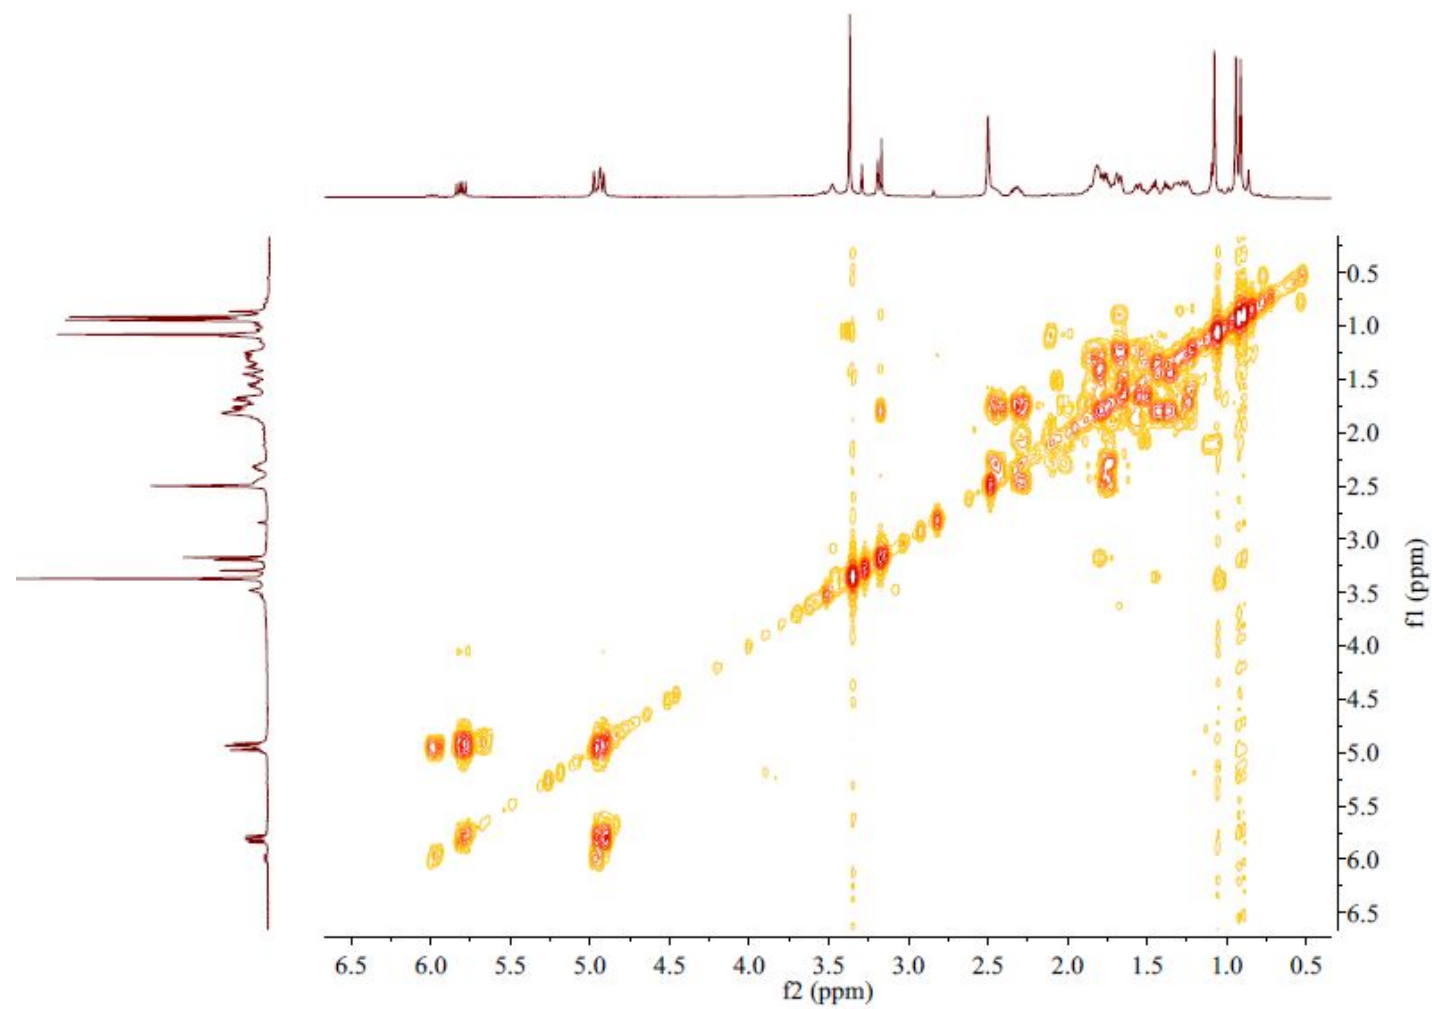

**Figure S32.** HSQC spectrum of compound **5**

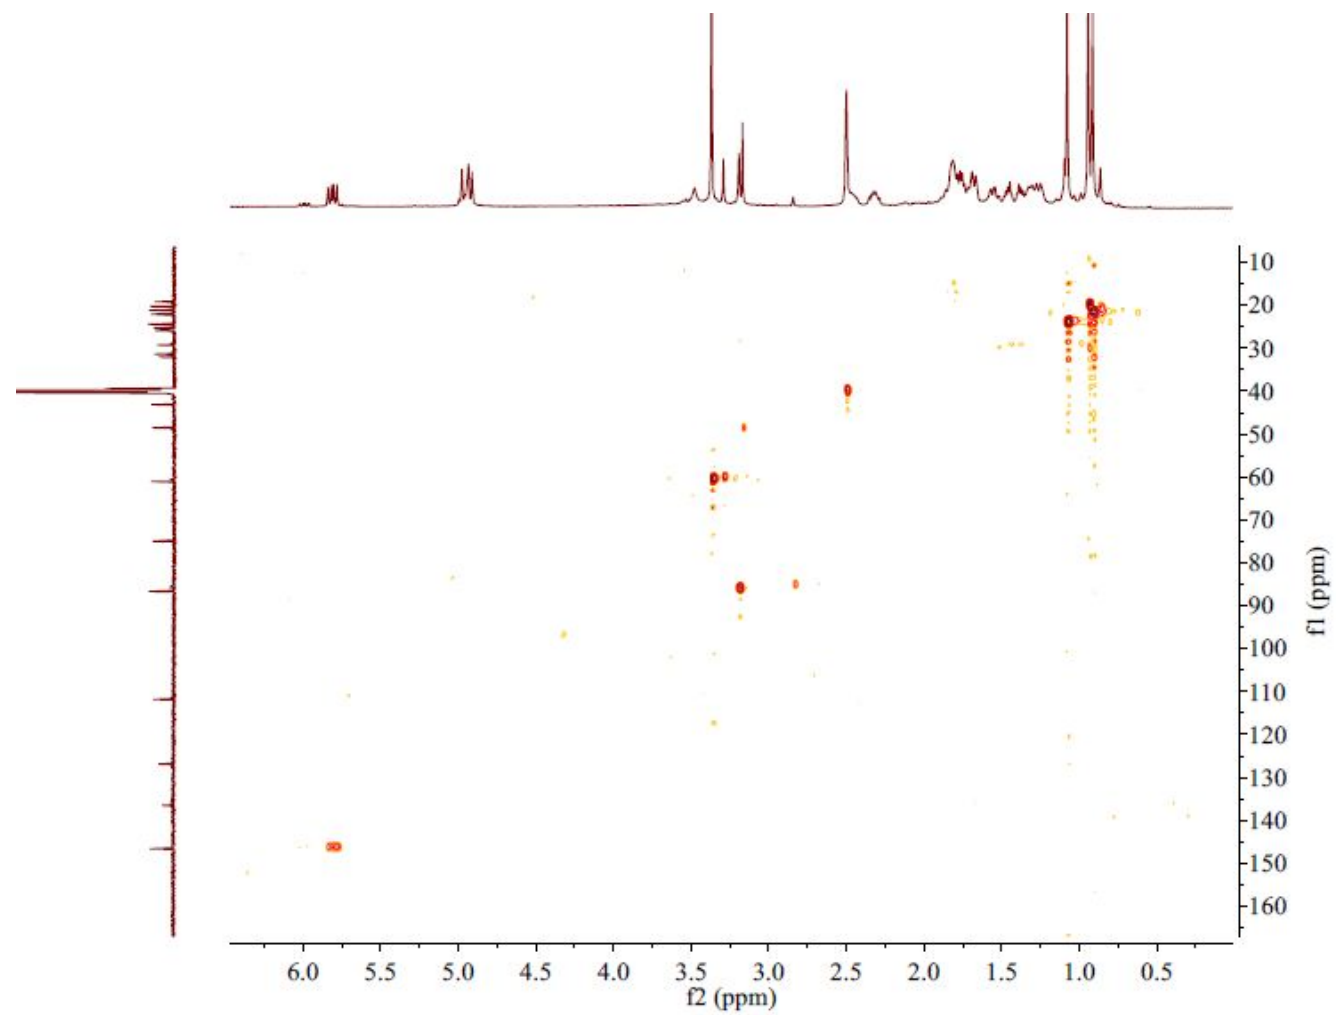

**Figure S33.** HMBC spectrum of compound **5**

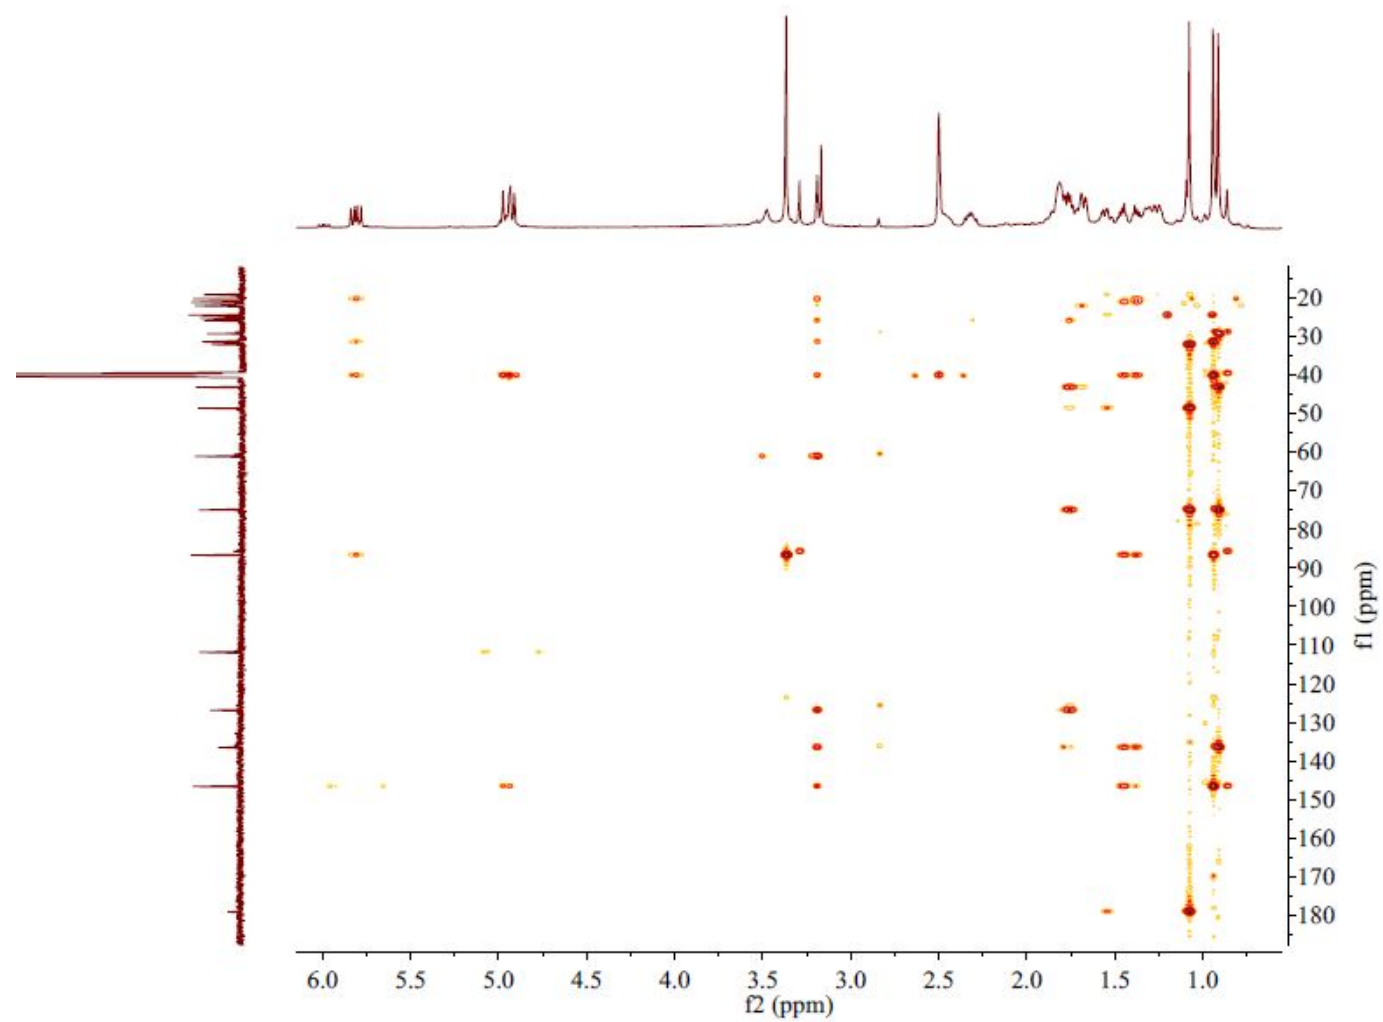

**Figure S34.** NOESY spectrum of compound **5**

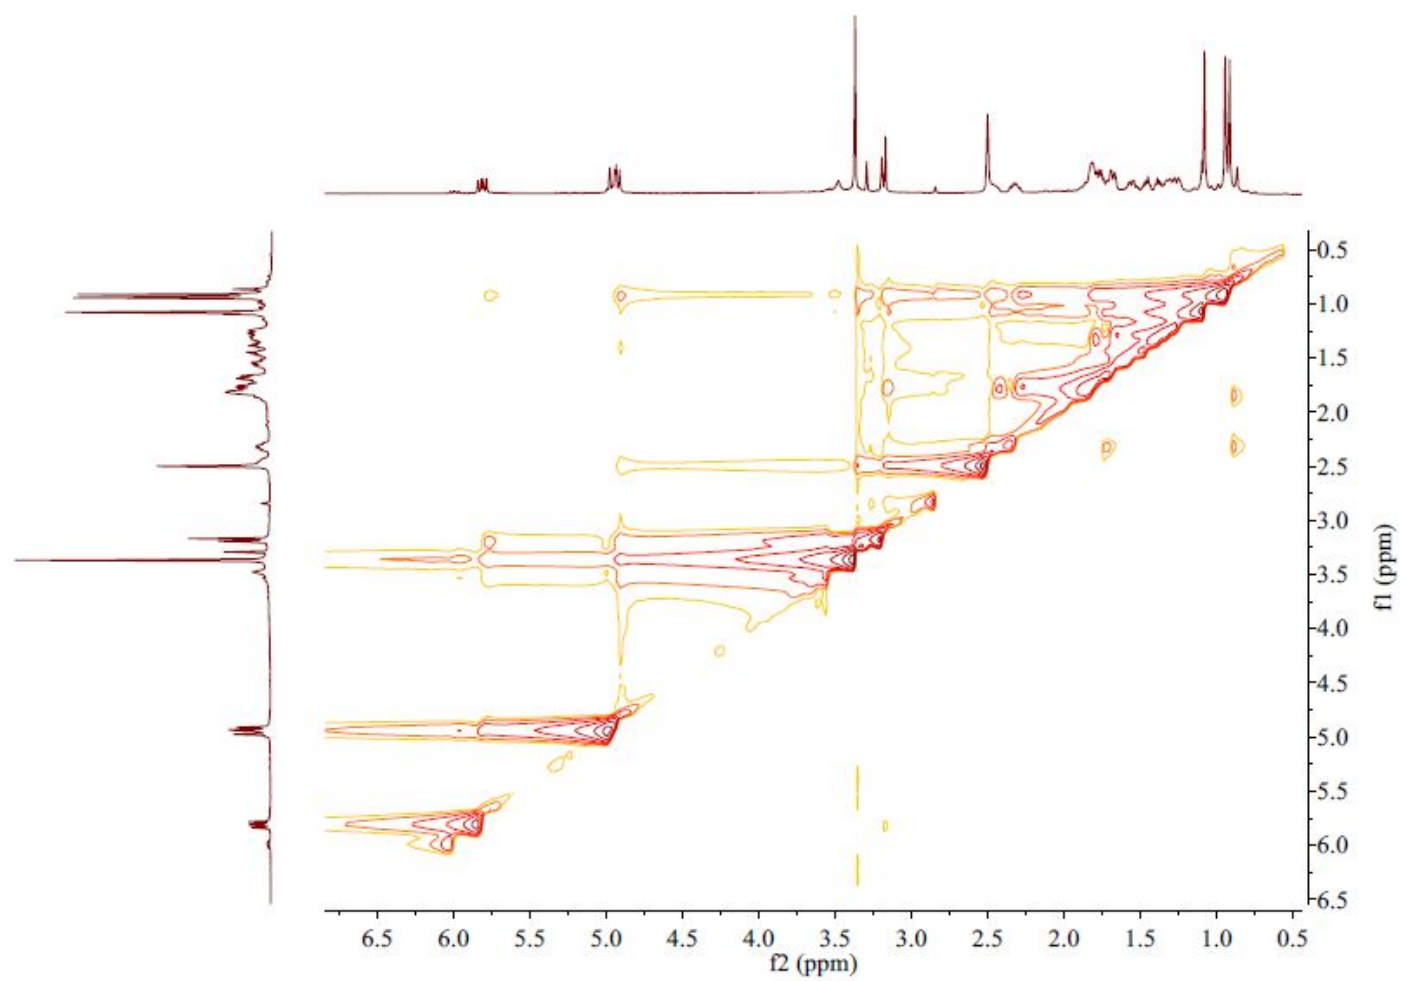

**Figure S35.** ECD spectrum of compound **5**

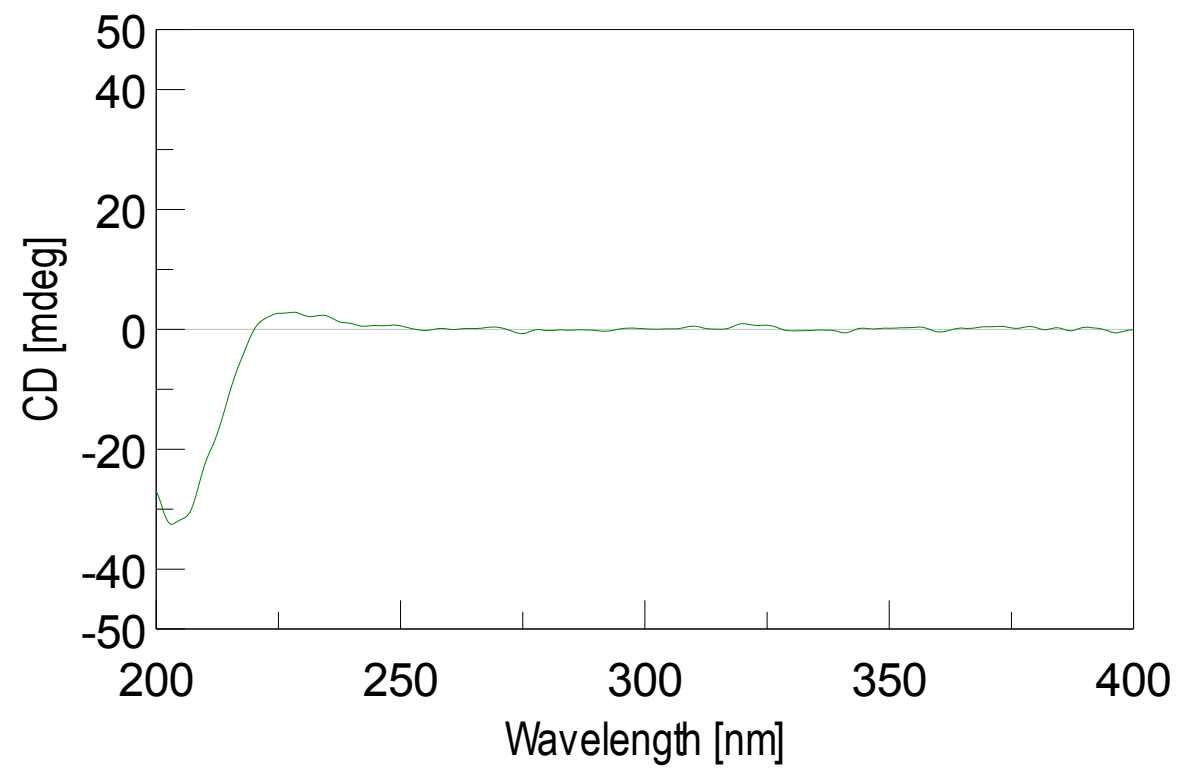

**Figure S36.**  $^1\text{H}$  NMR (500 MHz,  $\text{DMSO}-d_6$ ) spectrum of compound **6**

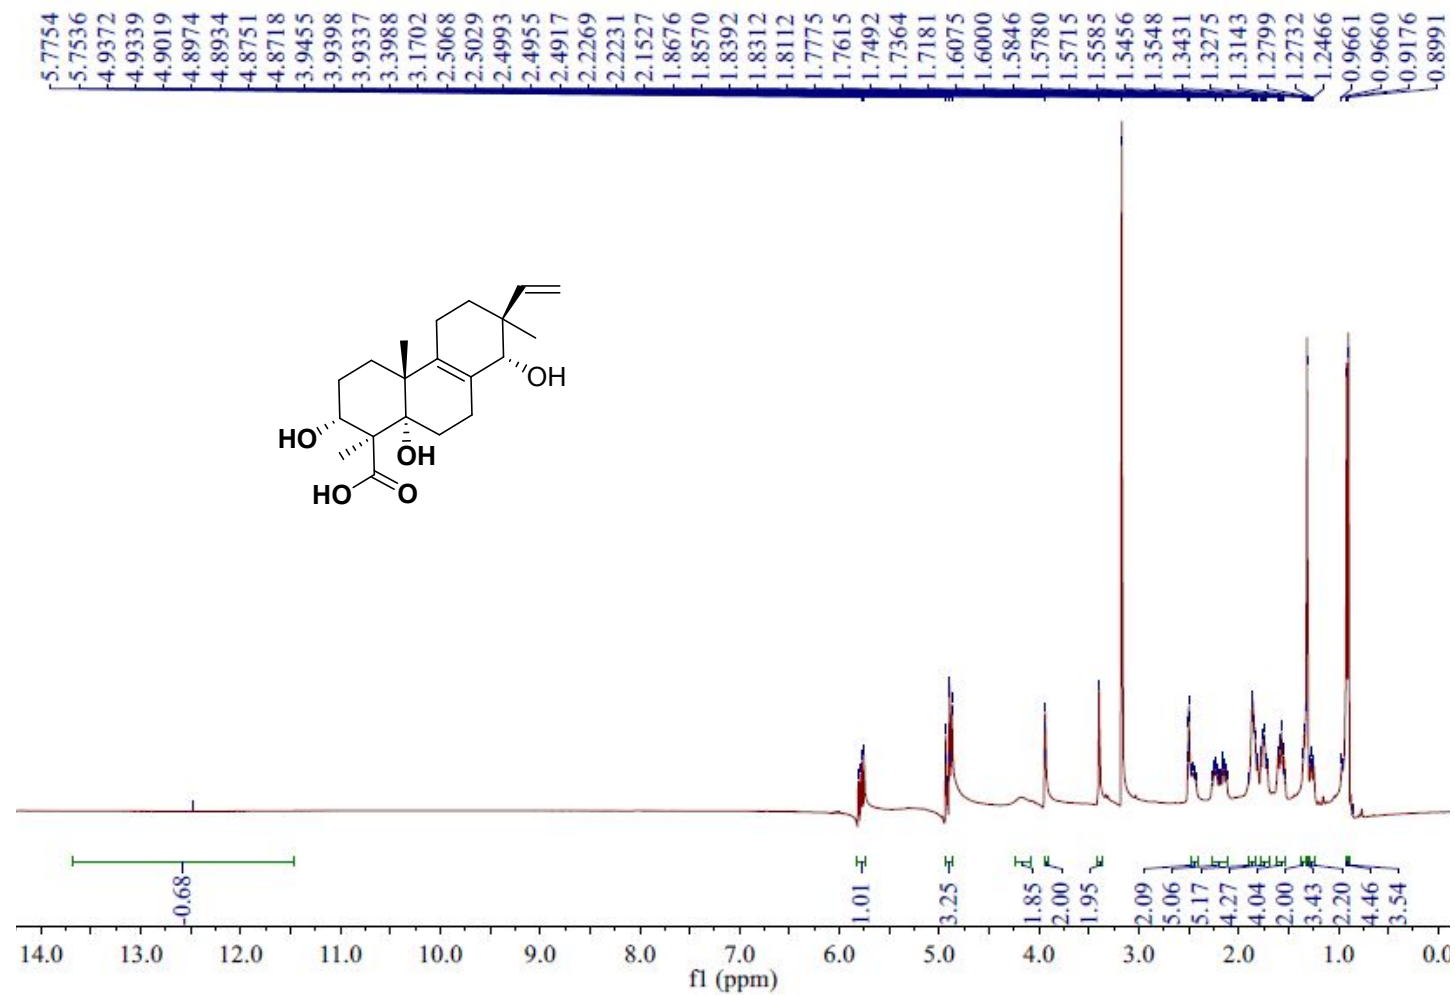

**Figure S37.**  $^{13}\text{C}$  NMR (125 MHz,  $\text{DMSO-}d_6$ ) and DEPT spectra of compound **6**

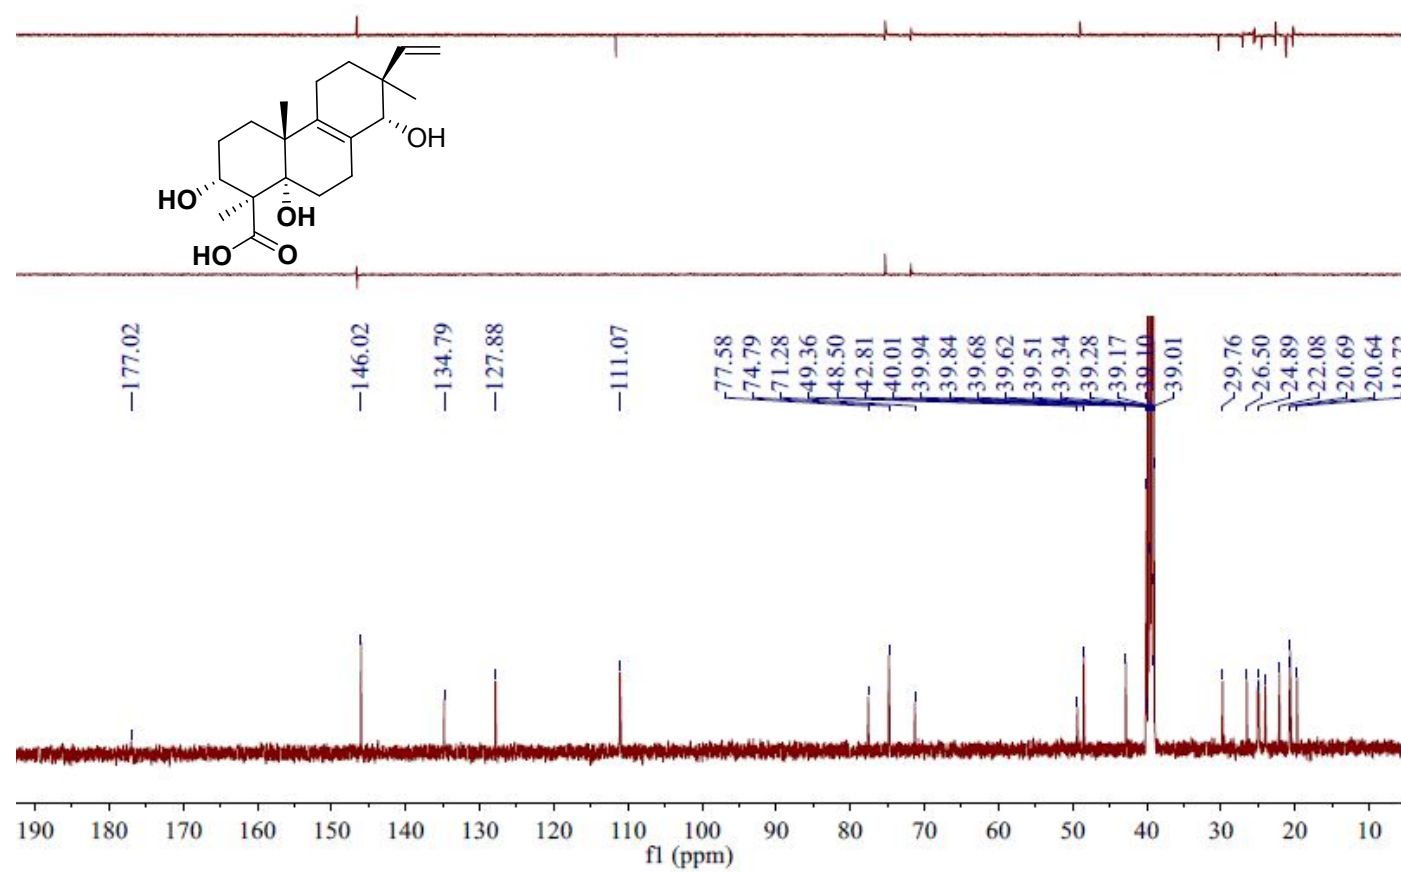



**Figure S38.** COSY spectrum of compound **6**

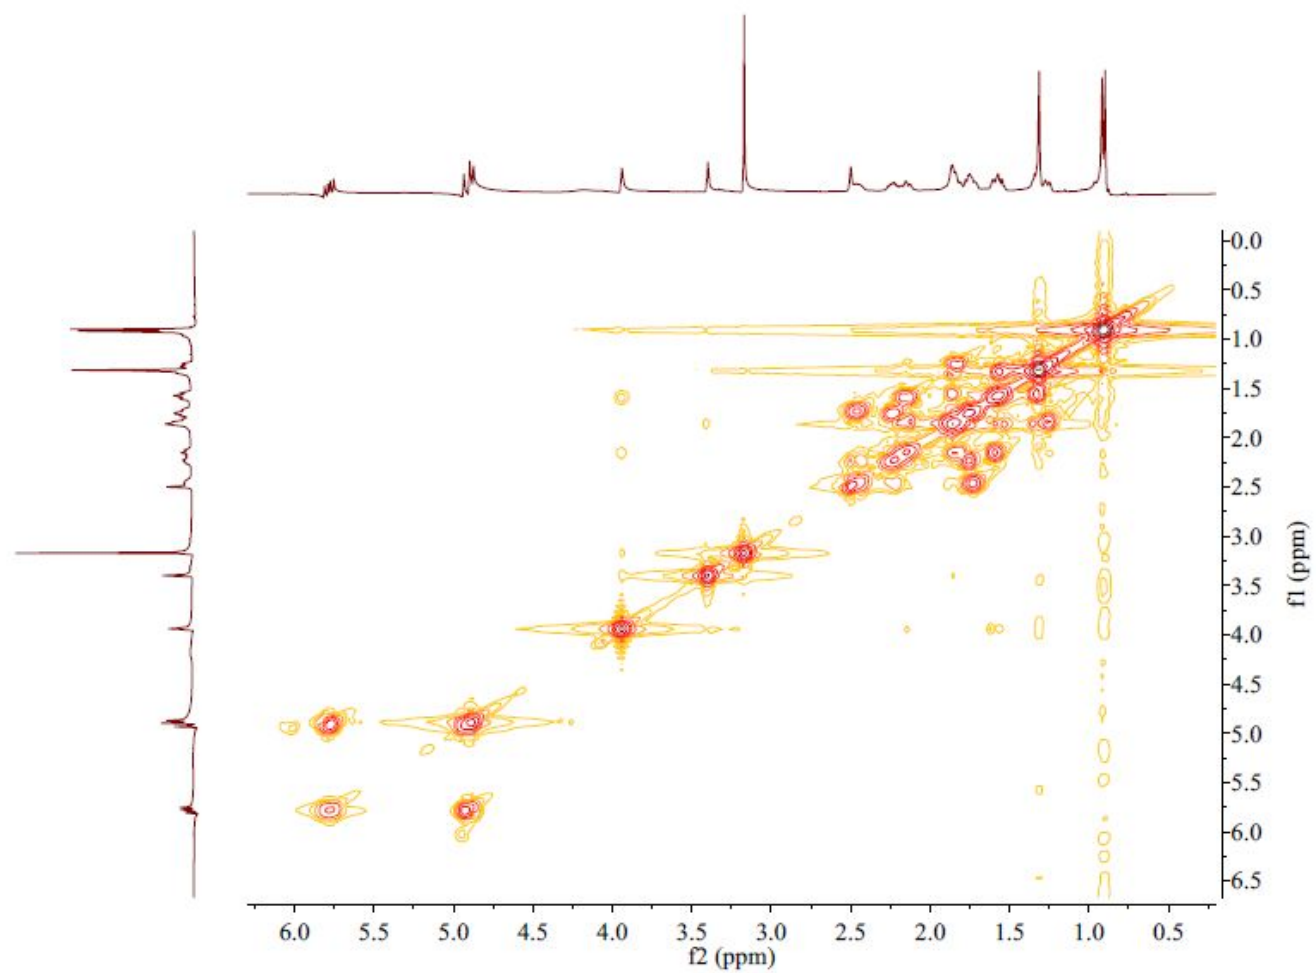

**Figure S39.** HSQC spectrum of compound **6**

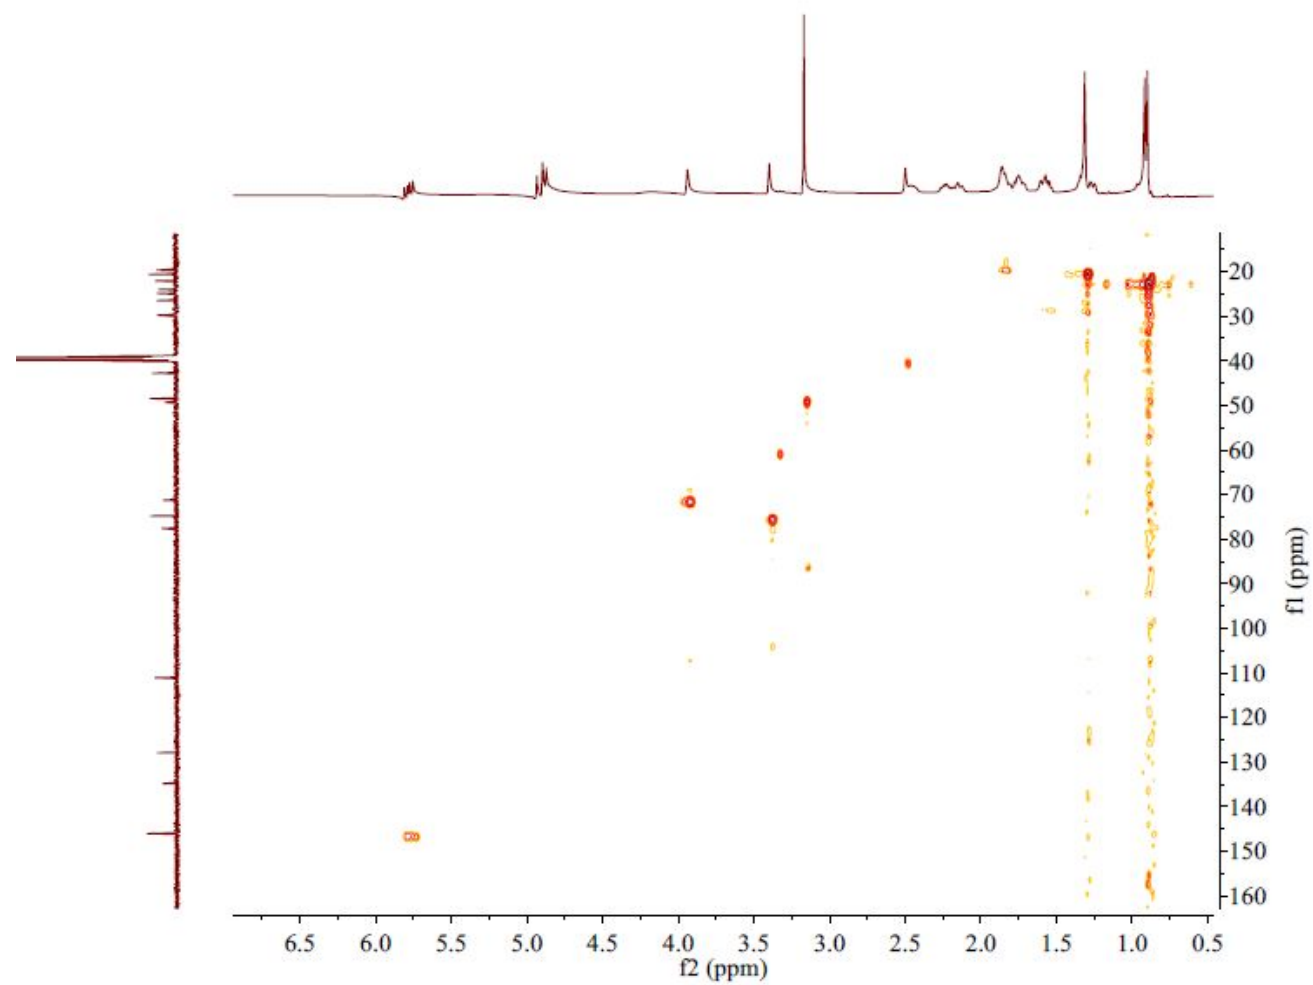

**Figure S40.** HMBC spectrum of compound **6**

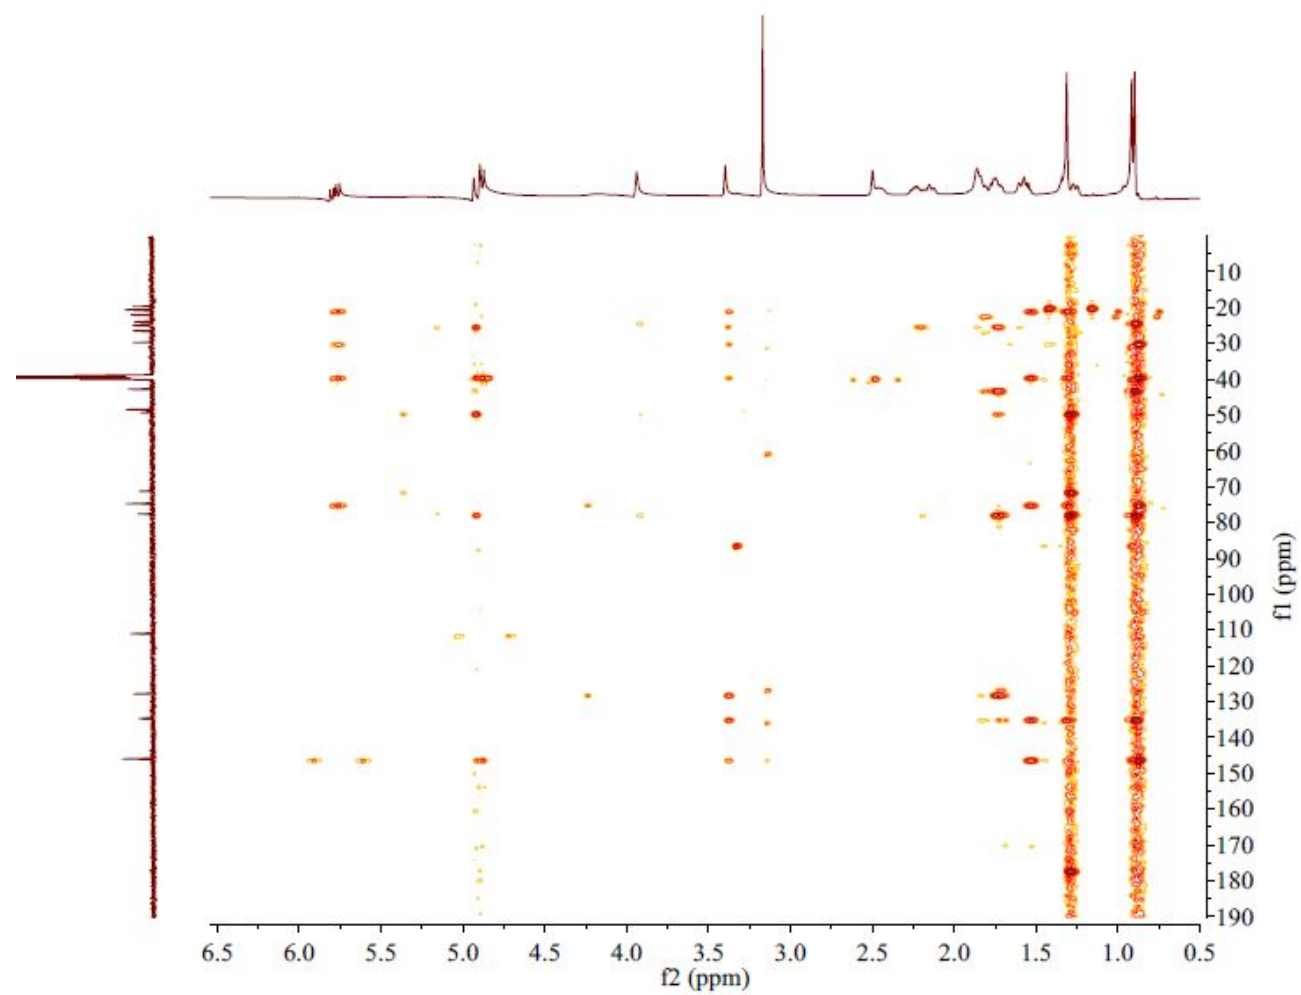

**Figure S41.** NOESY spectrum of compound **6**

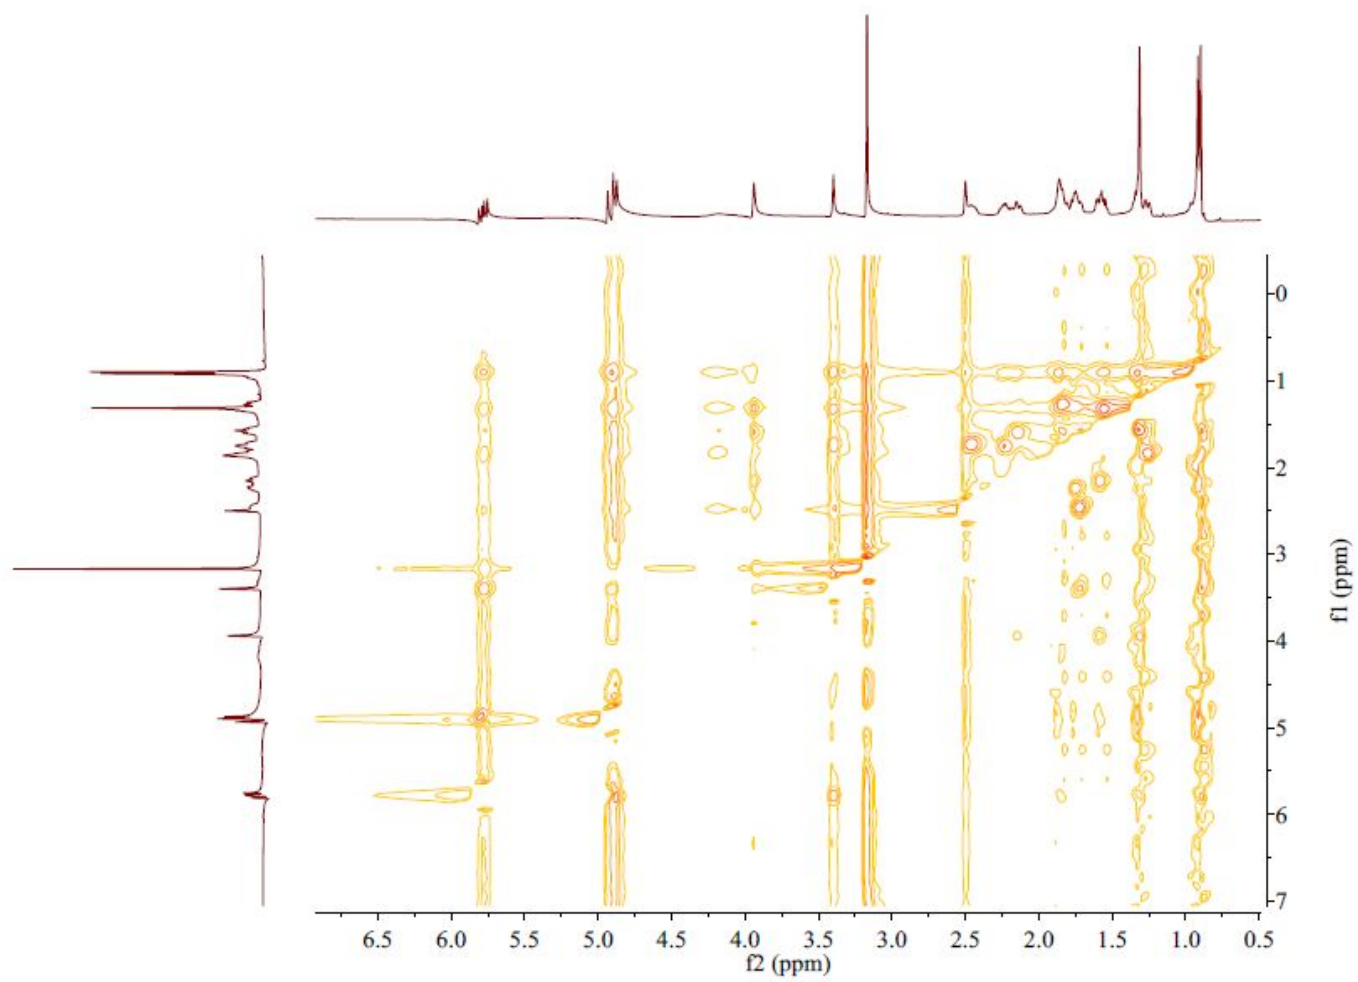

**Figure S42.** ECD spectrum of compound **6**

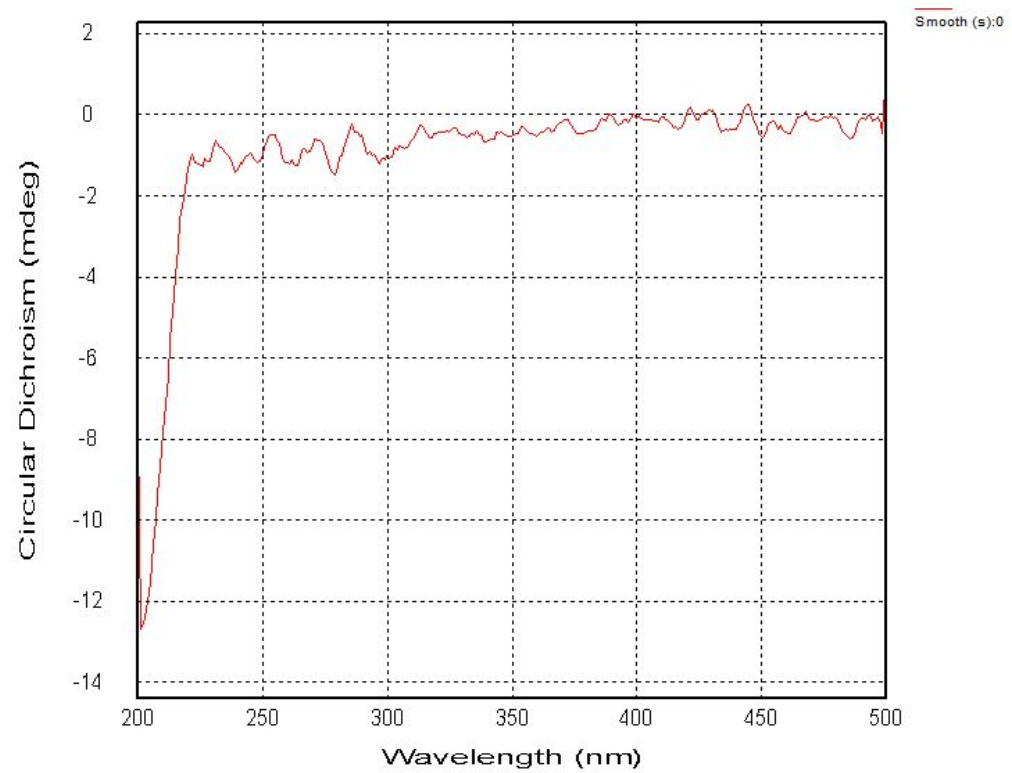

**Figure S43.**  $^1\text{H}$  NMR (600 MHz,  $\text{DMSO}-d_6$ ) spectrum of compound 7

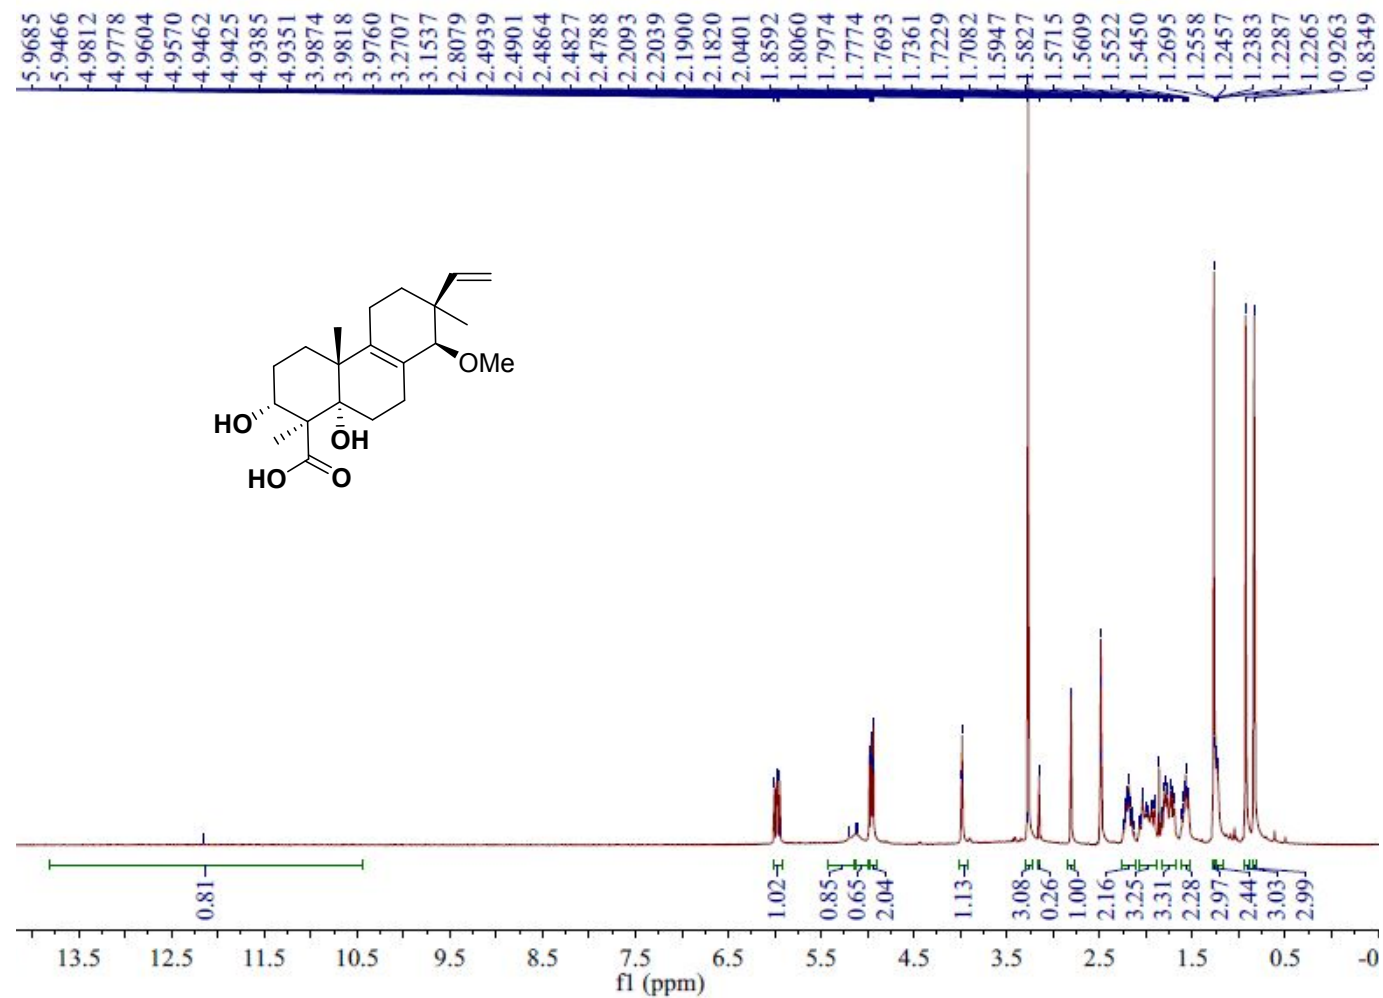

**Figure S44.**  $^{13}\text{C}$  NMR (150 MHz,  $\text{DMSO-}d_6$ ) and DEPT spectra of compound 7

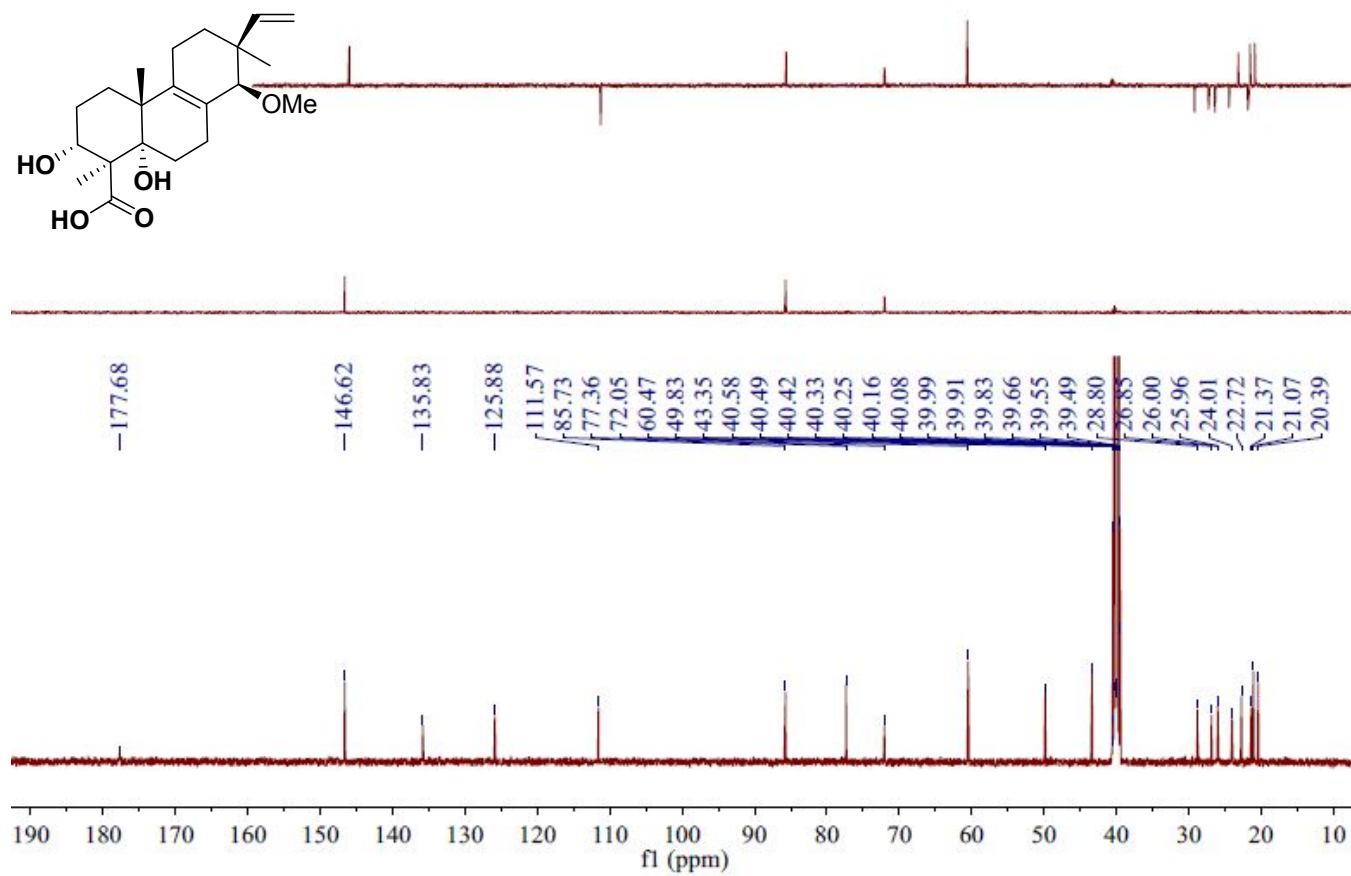

**Figure S45.** COSY spectrum of compound 7

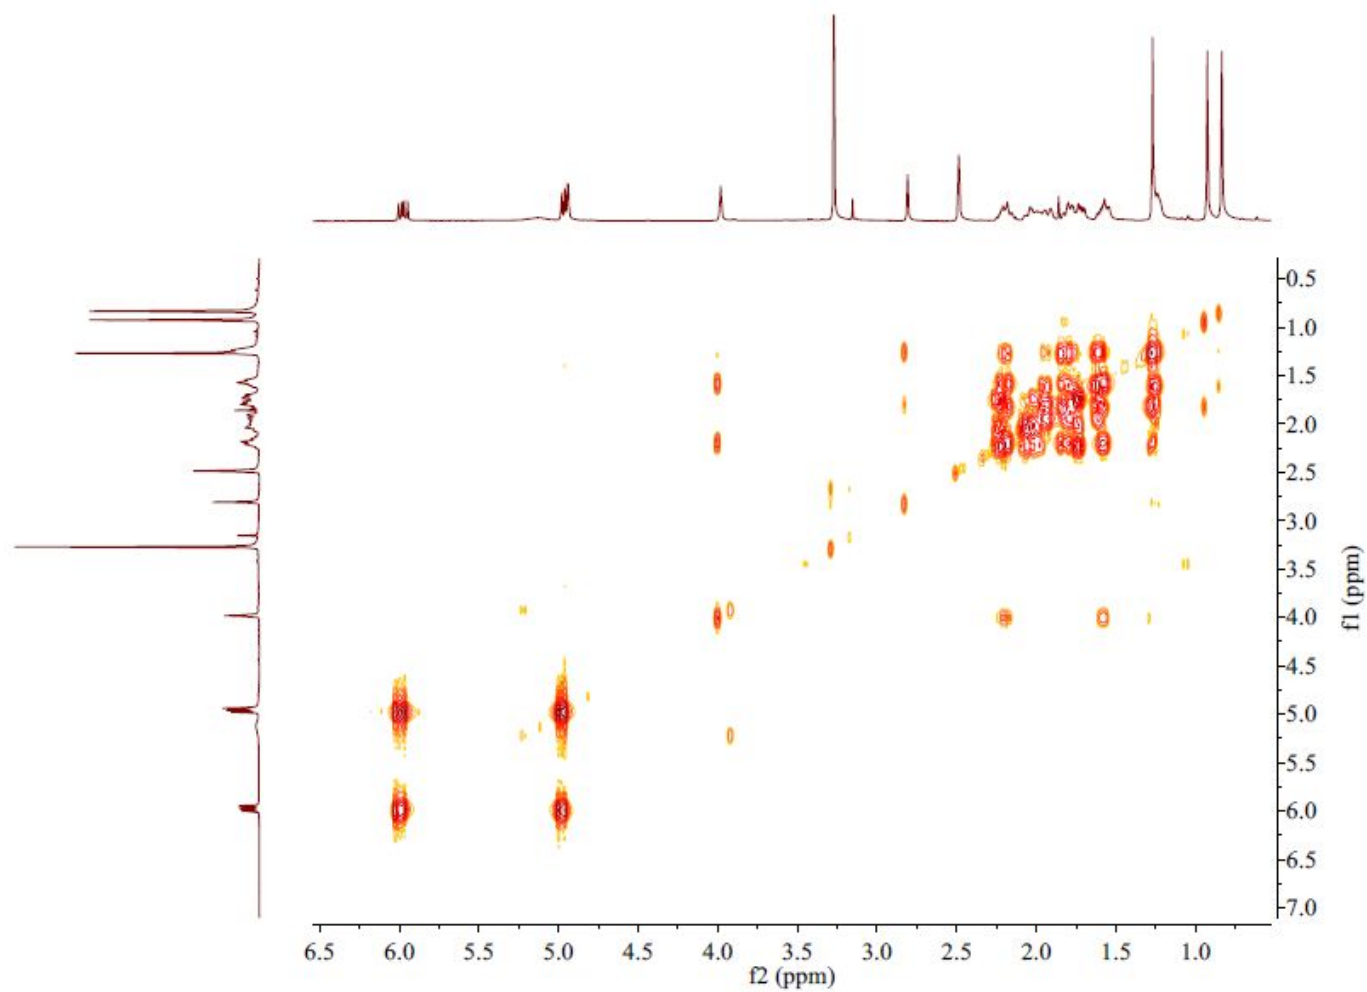



**Figure S46.** HSQC spectrum of compound 7

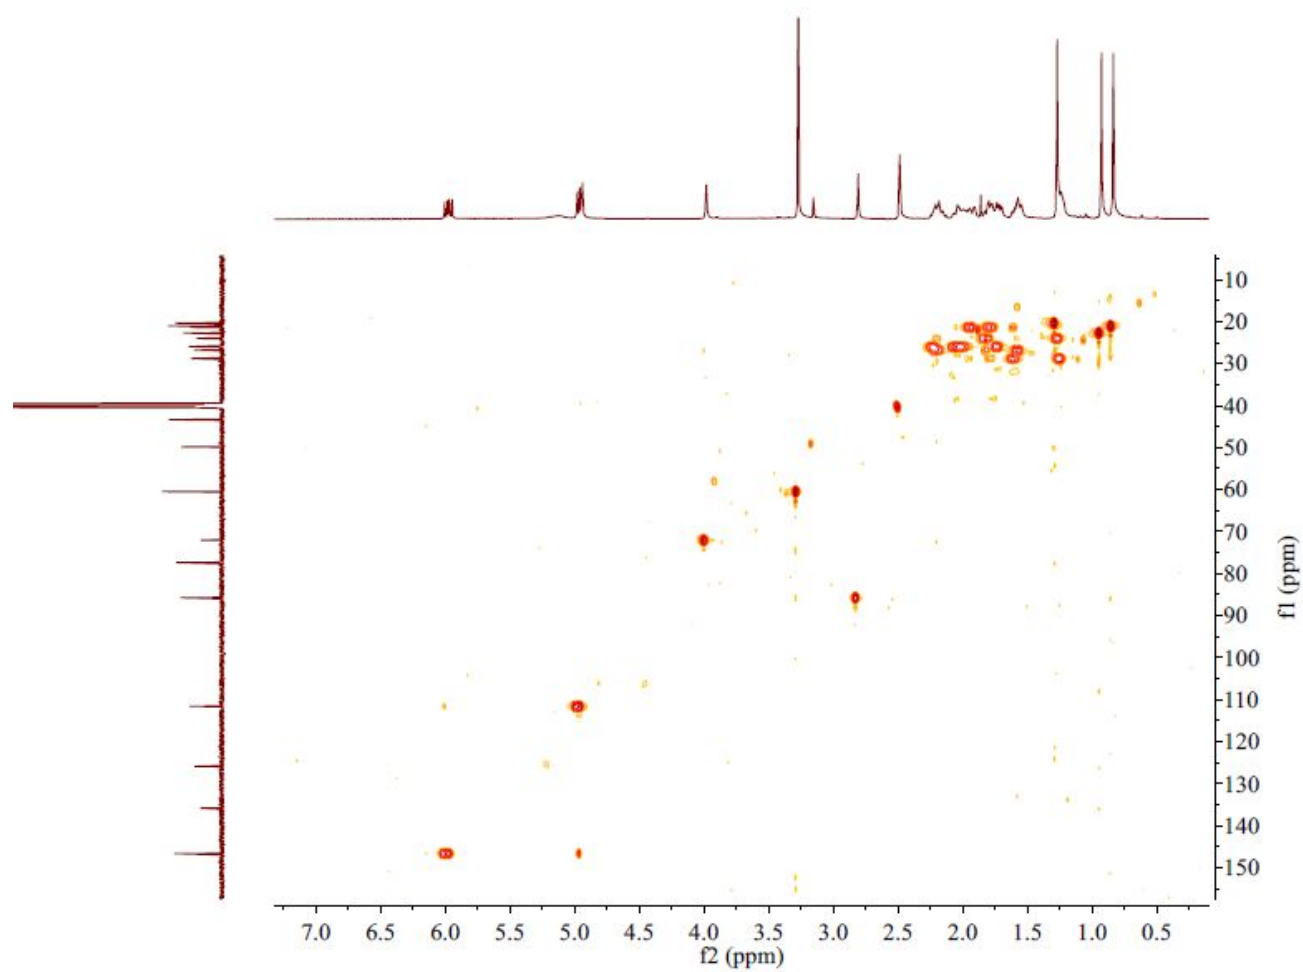

**Figure S47.** HMBC spectrum of compound 7

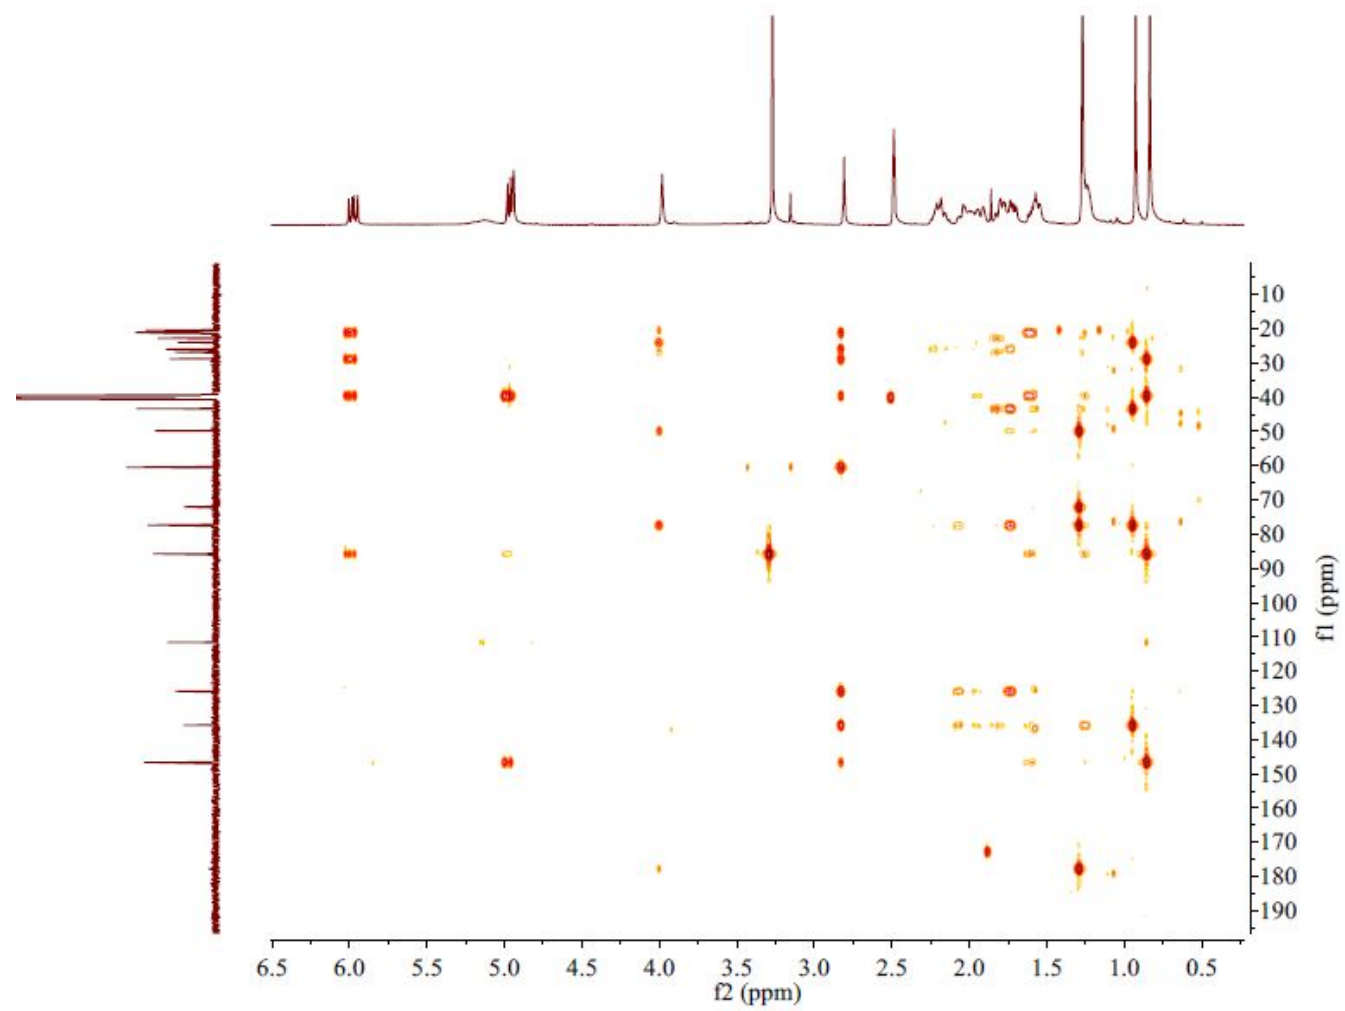

**Figure S48.** NOESY spectrum of compound **7**

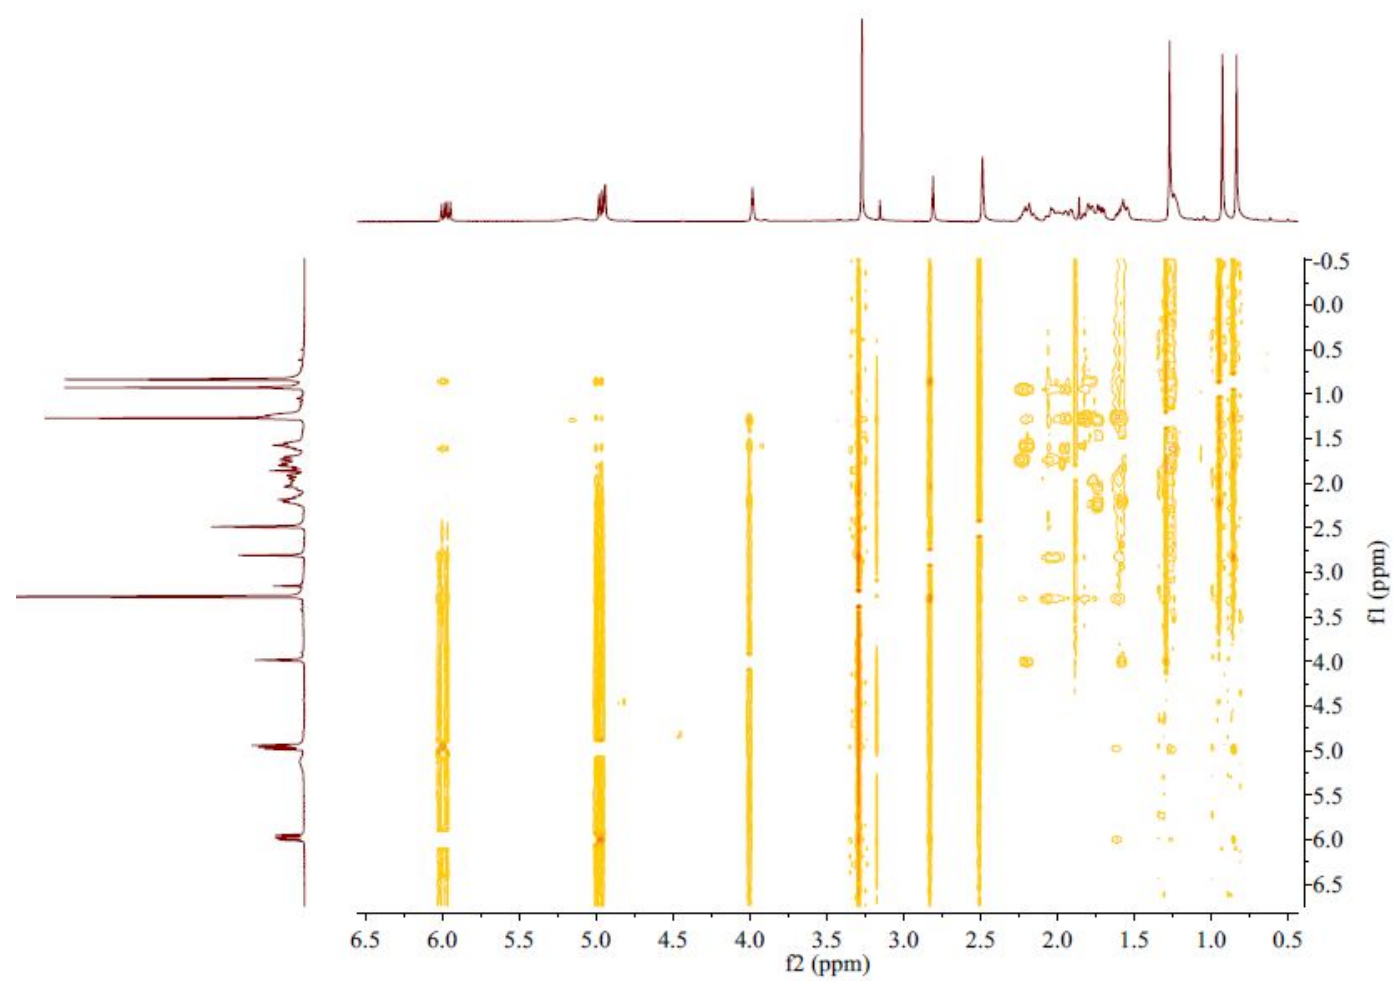

**Figure S49.** ECD spectrum of compound **7**

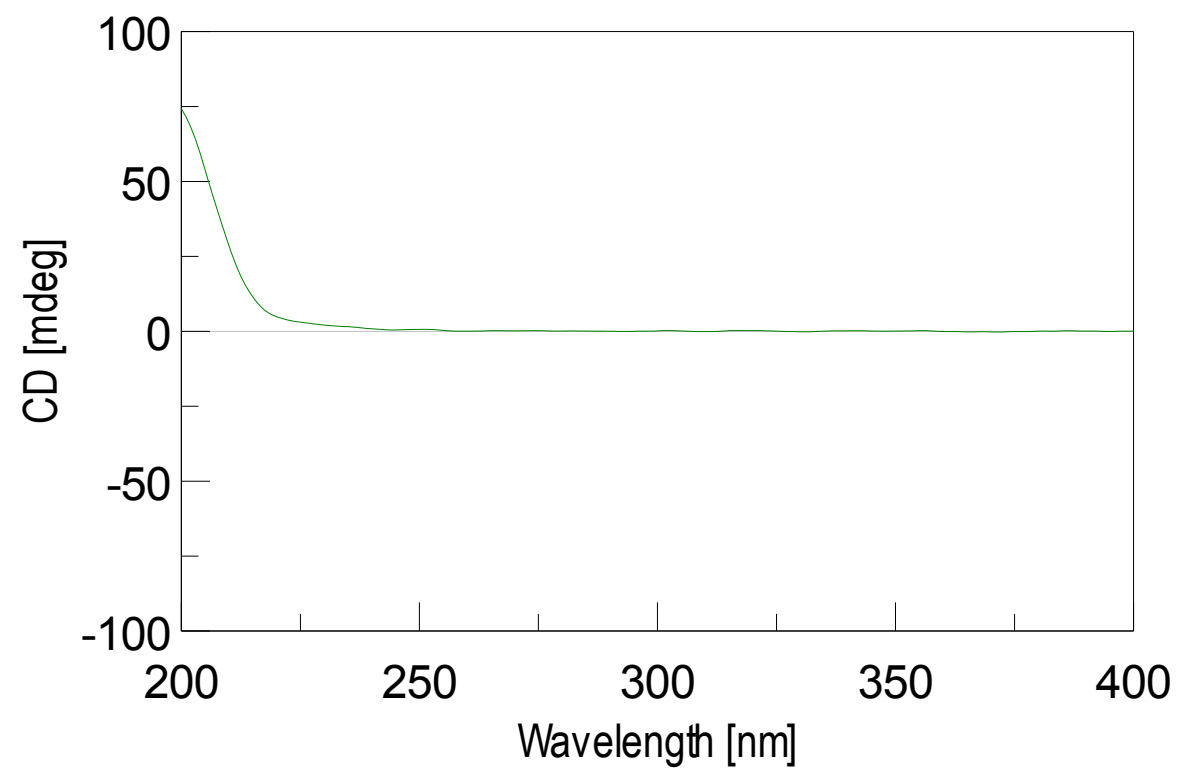

**Figure S50.**  $^1\text{H}$  NMR (600 MHz,  $\text{DMSO}-d_6$ ) spectrum of compound **8**

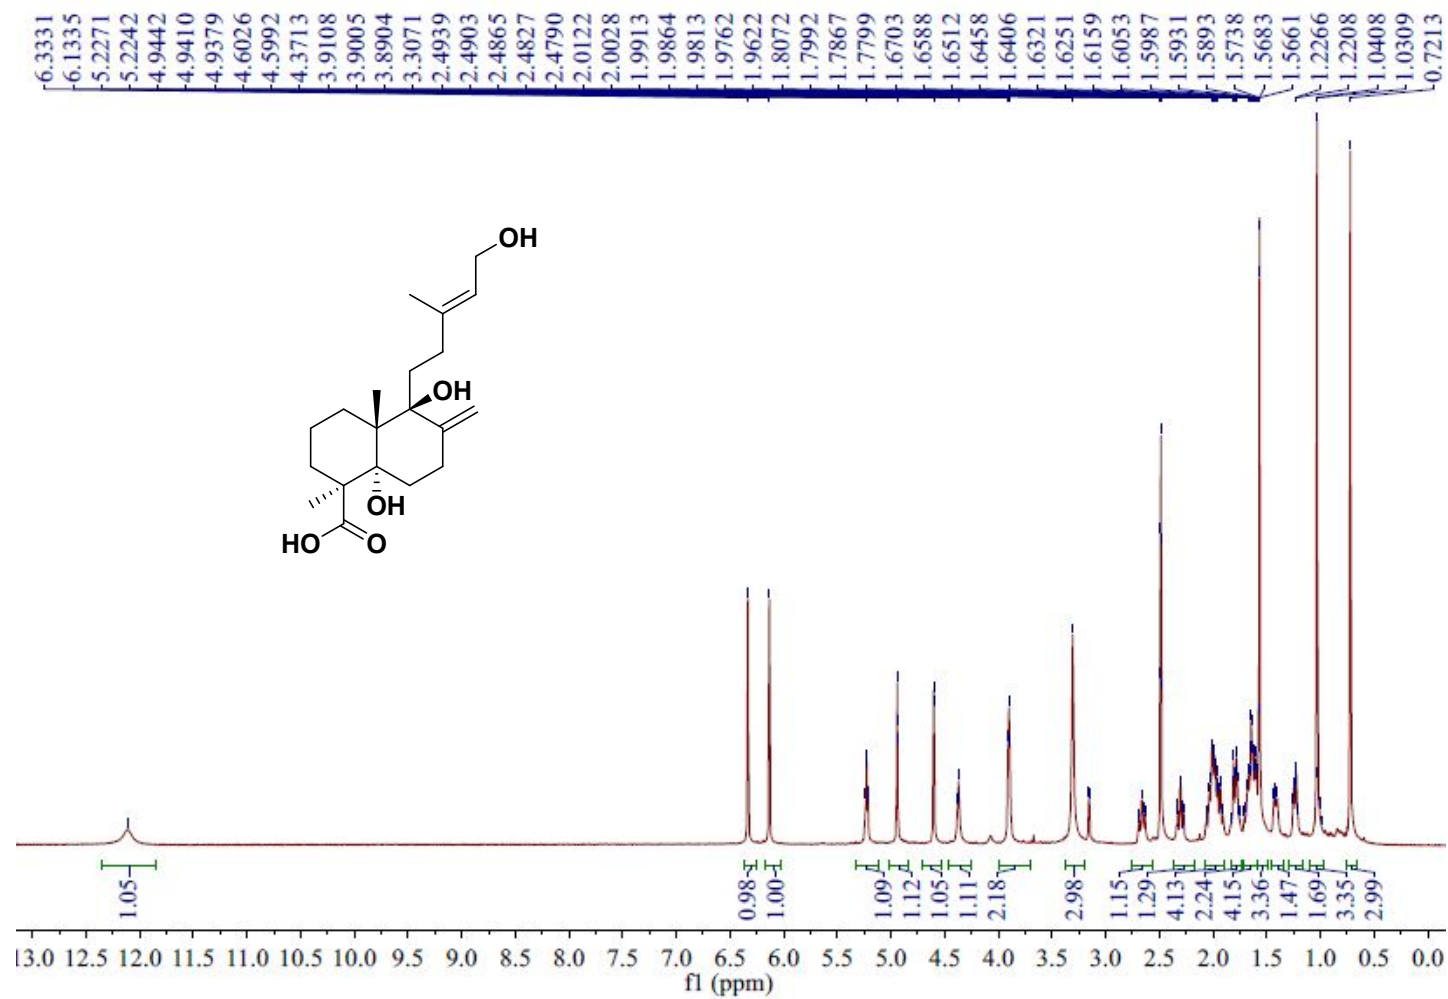

**Figure S51.**  $^{13}\text{C}$  NMR (150 MHz,  $\text{DMSO-}d_6$ ) and DEPT spectra of compound **8**

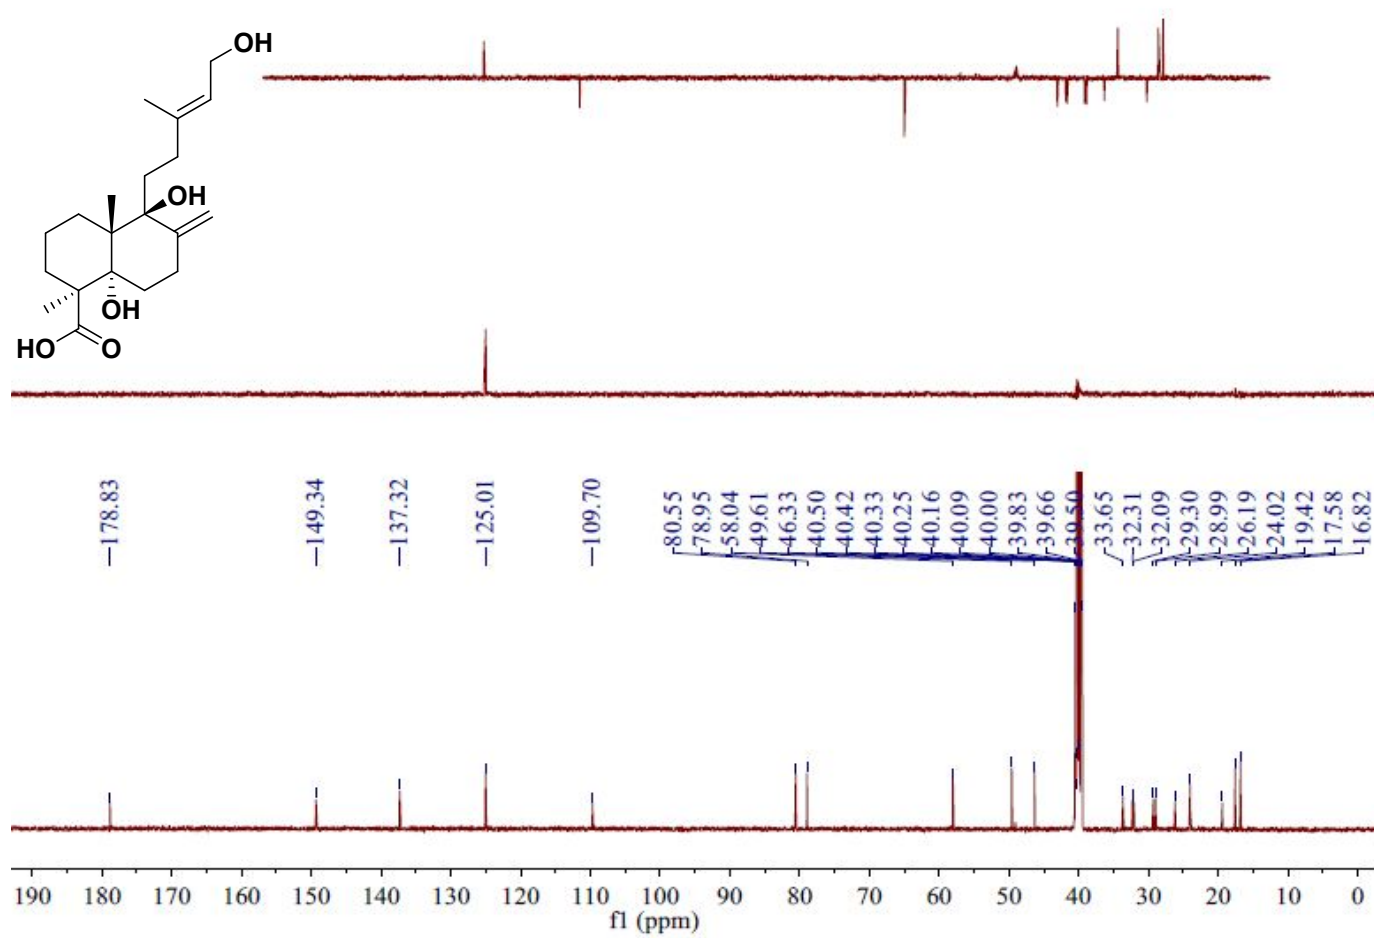

**Figure S52.** COSY spectrum of compound **8**

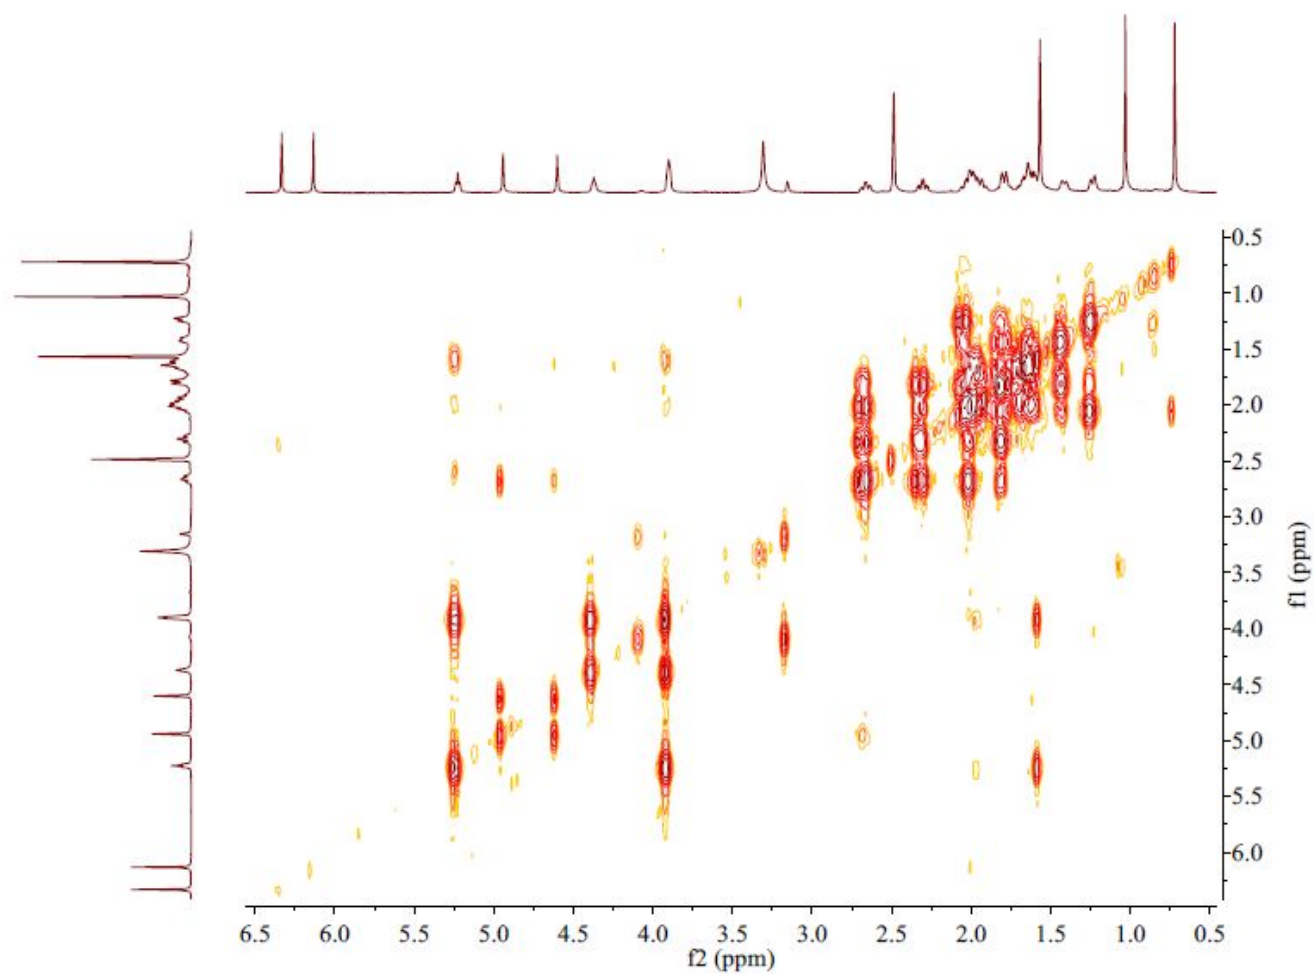

**Figure S53.** HSQC spectrum of compound **8**

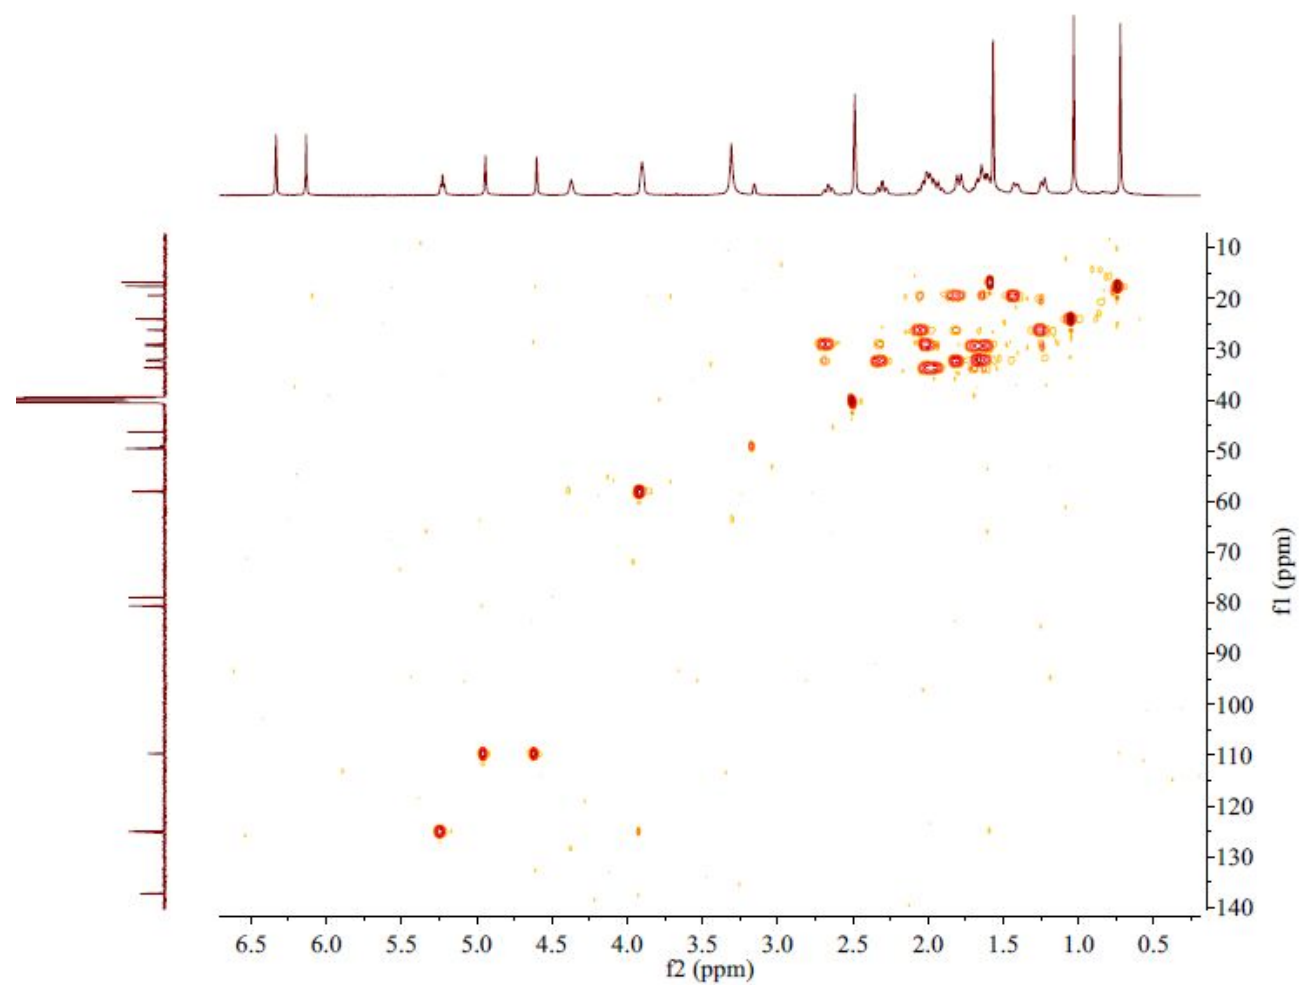



**Figure S54.** HMBC spectrum of compound **8**

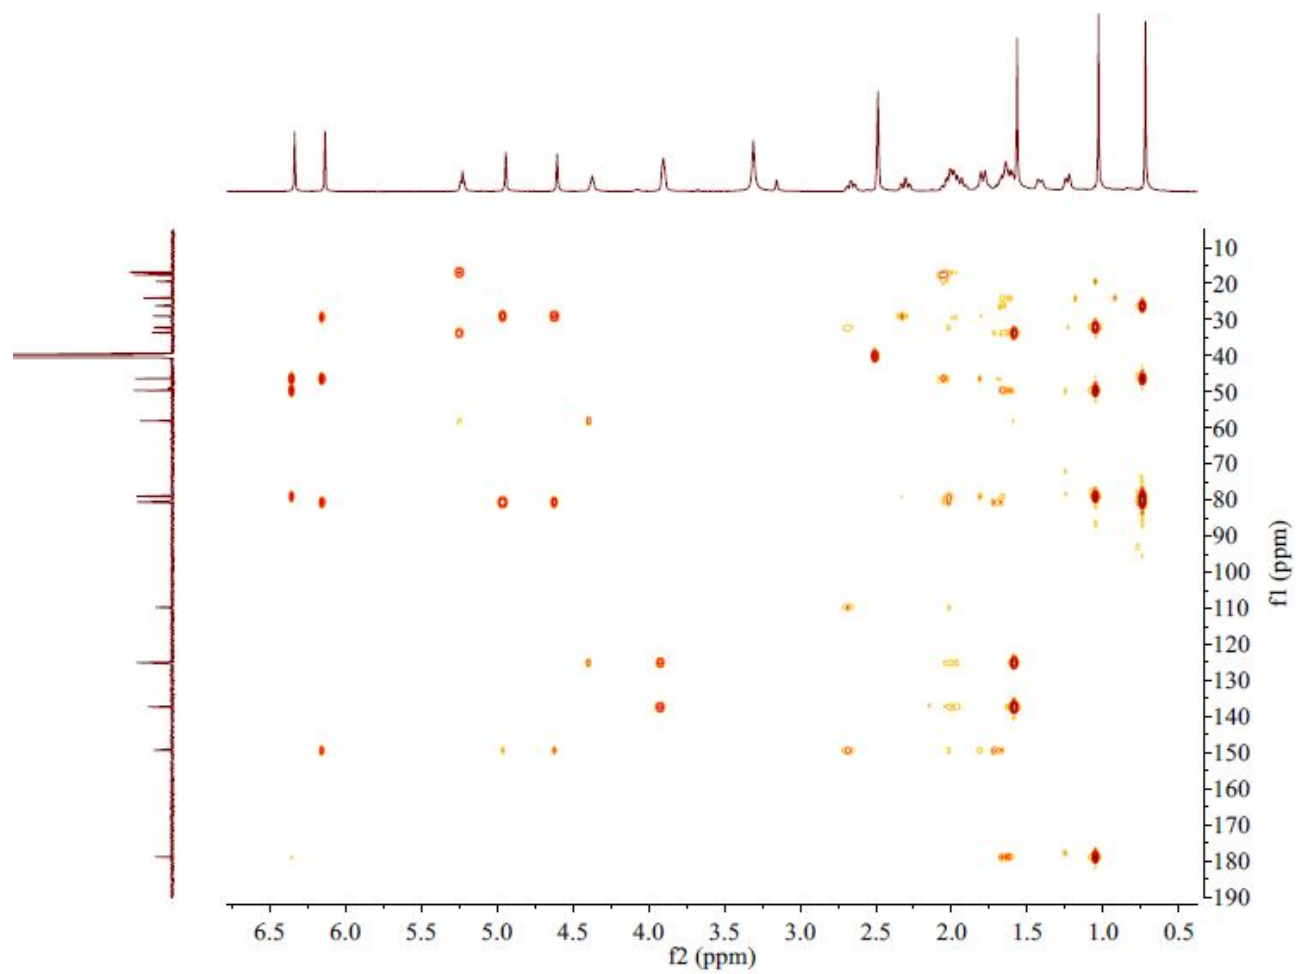

**Figure S55.** NOESY spectrum of compound **8**

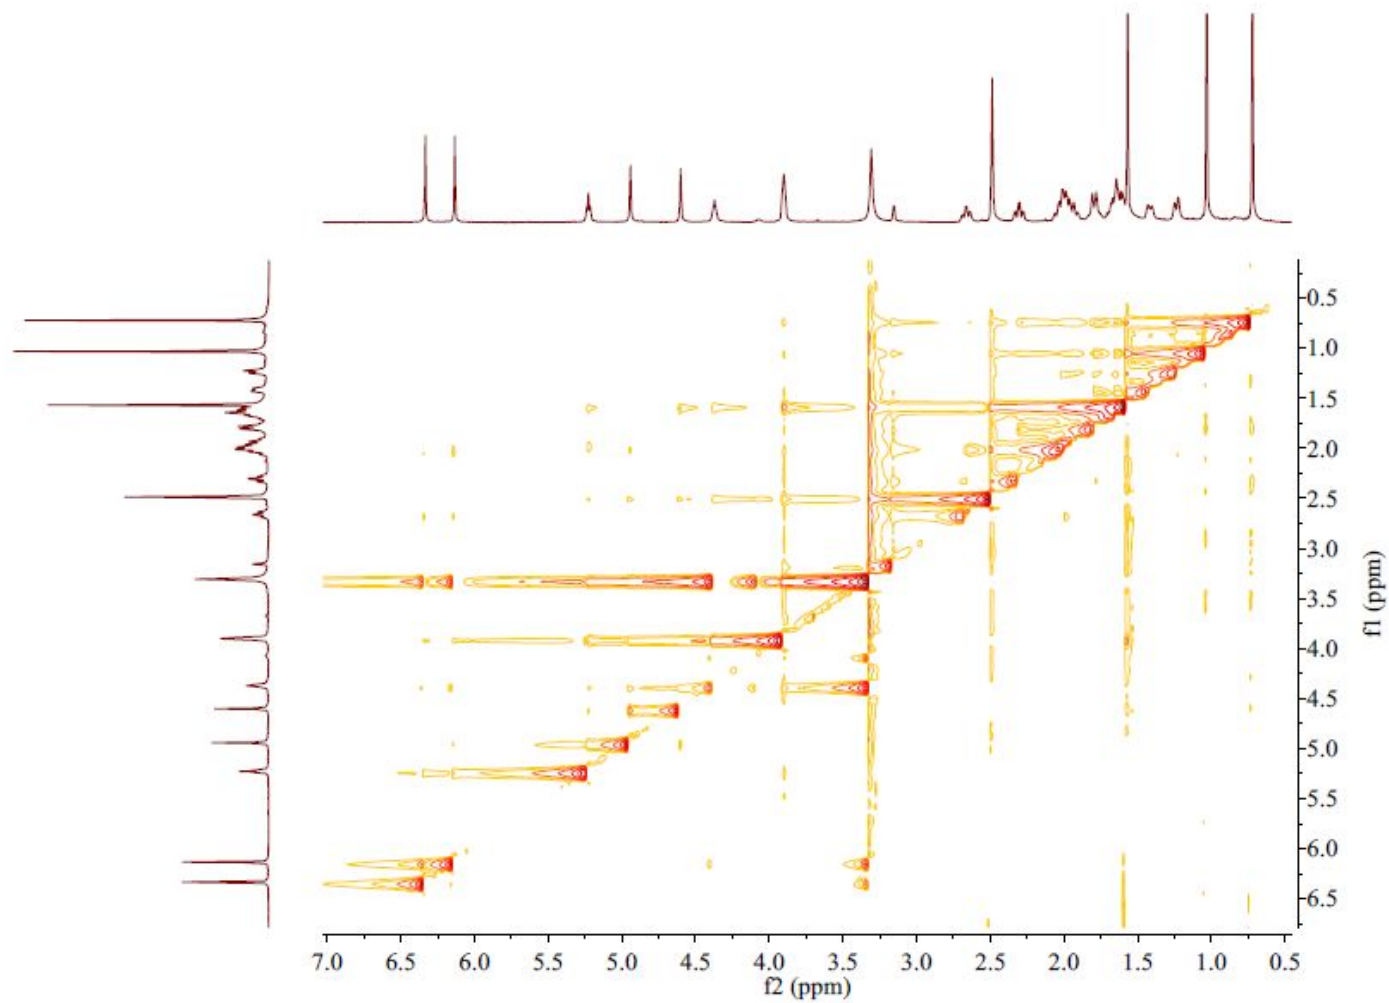

**Figure S56.** ECD spectrum of compound **8**

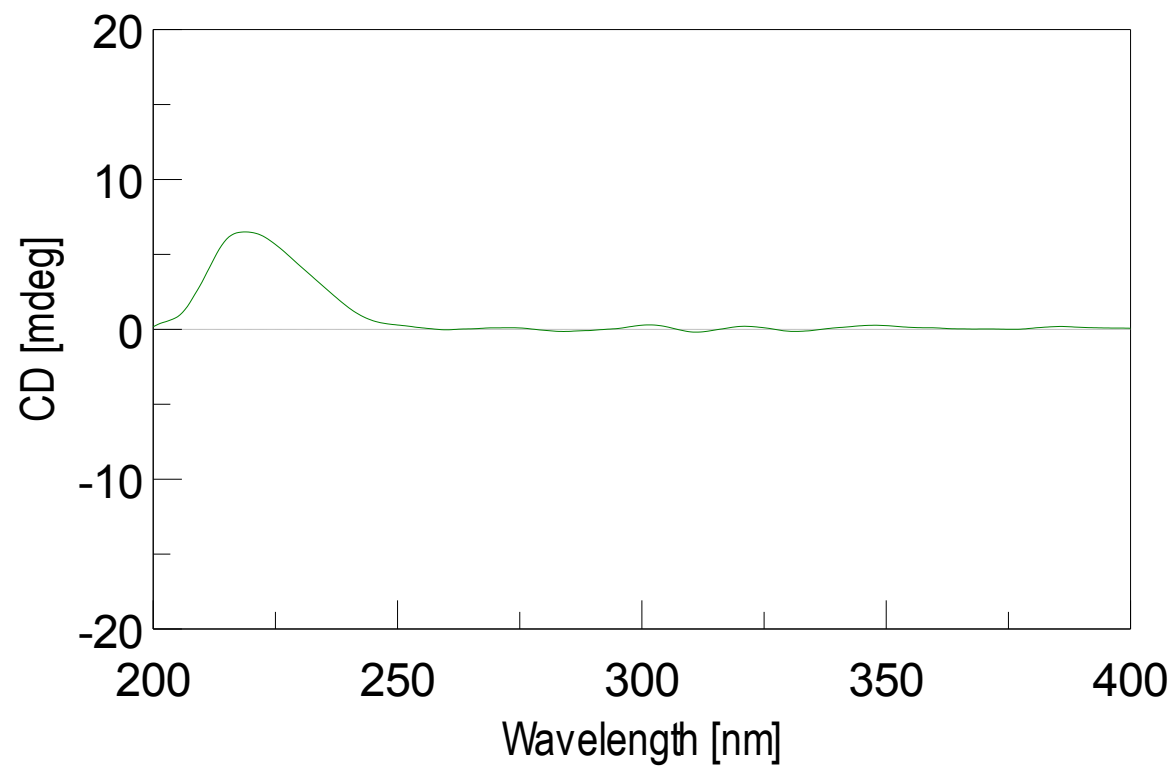

**Figure S57.**Crystal packing of compound **1** at 300(2) K

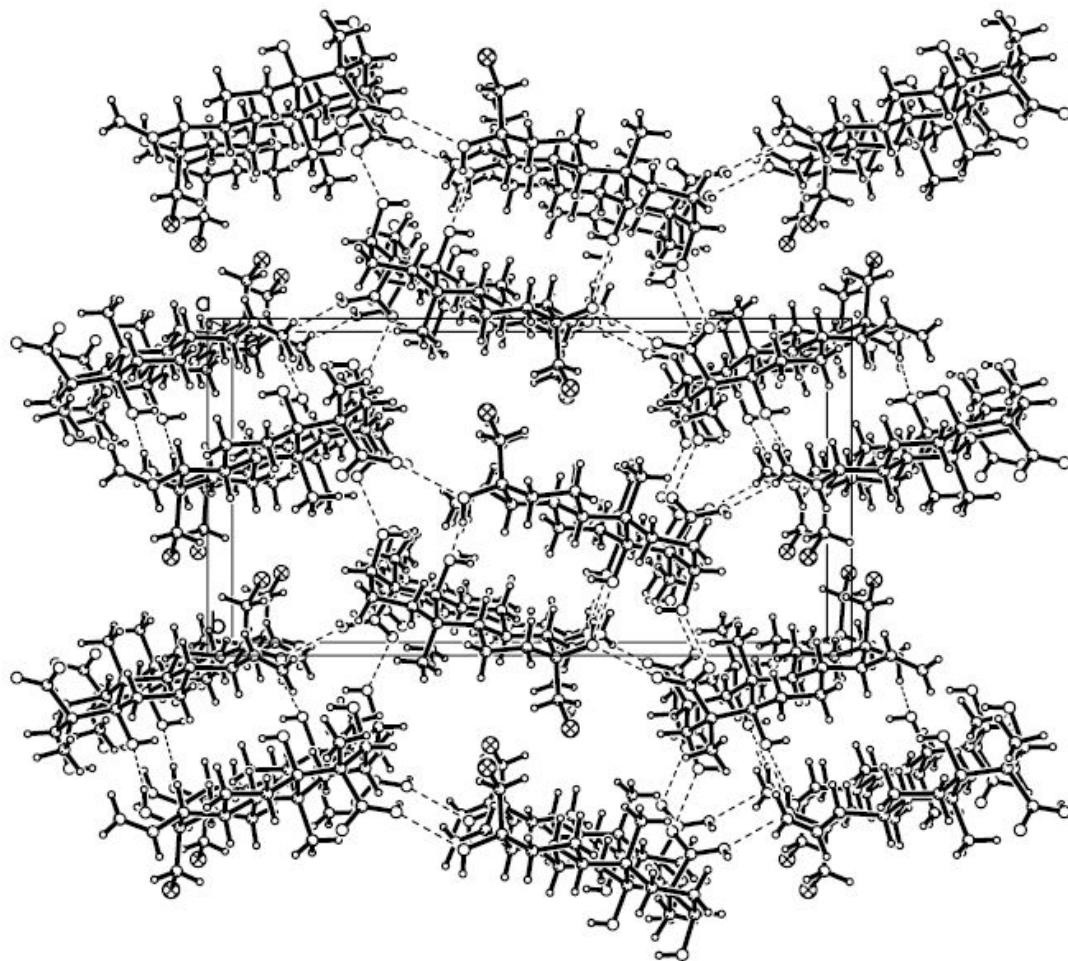

**Figure S58.**Crystal packing of compound **2** at 297(2) K

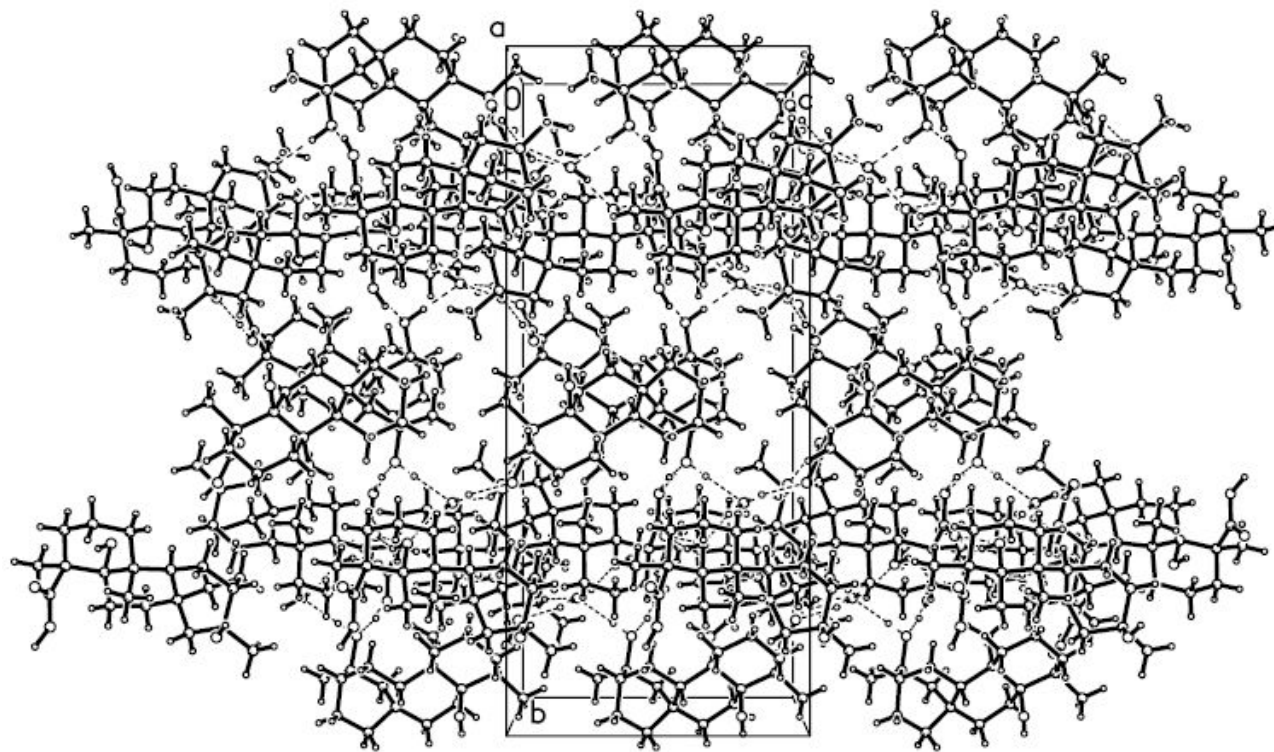

**Figure S59.**Crystal packing of compound **3** at 293(2) K

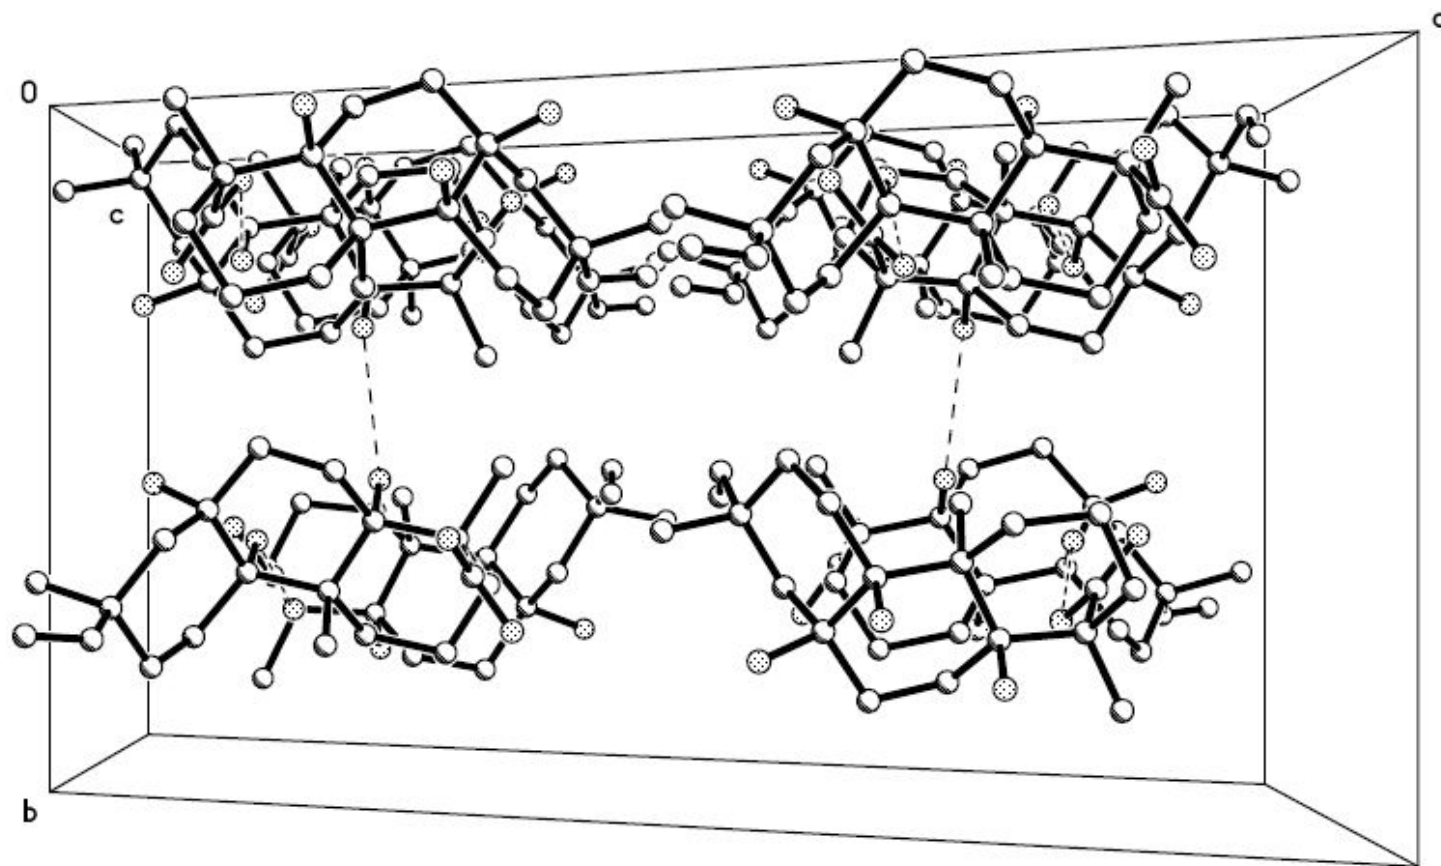

**Figure S60.**Crystal packing of compound **4** at 293(2) K

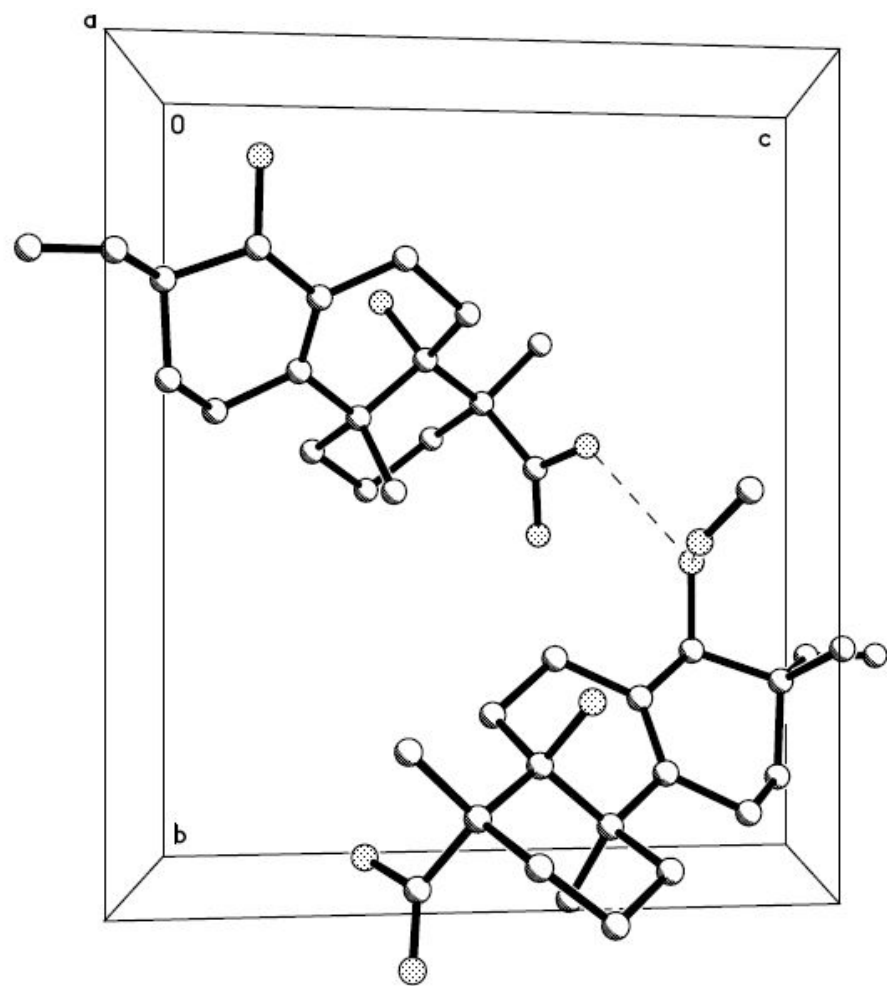

**Figure S61.**Crystal packing of compound **5** at 298(2) K

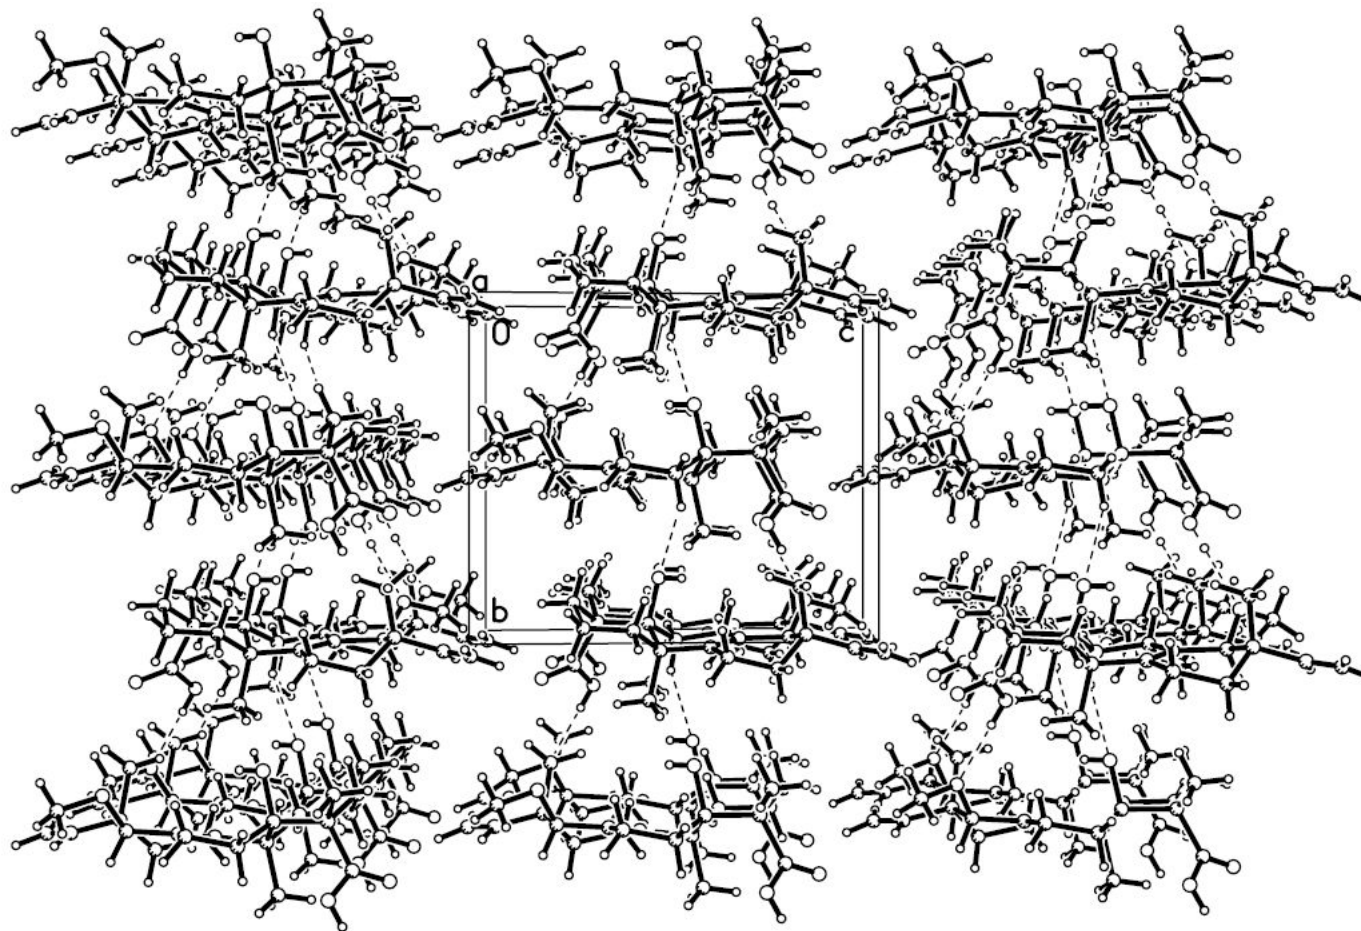

**Figure S62.**Crystal packing of compound **7** at 293(2) K



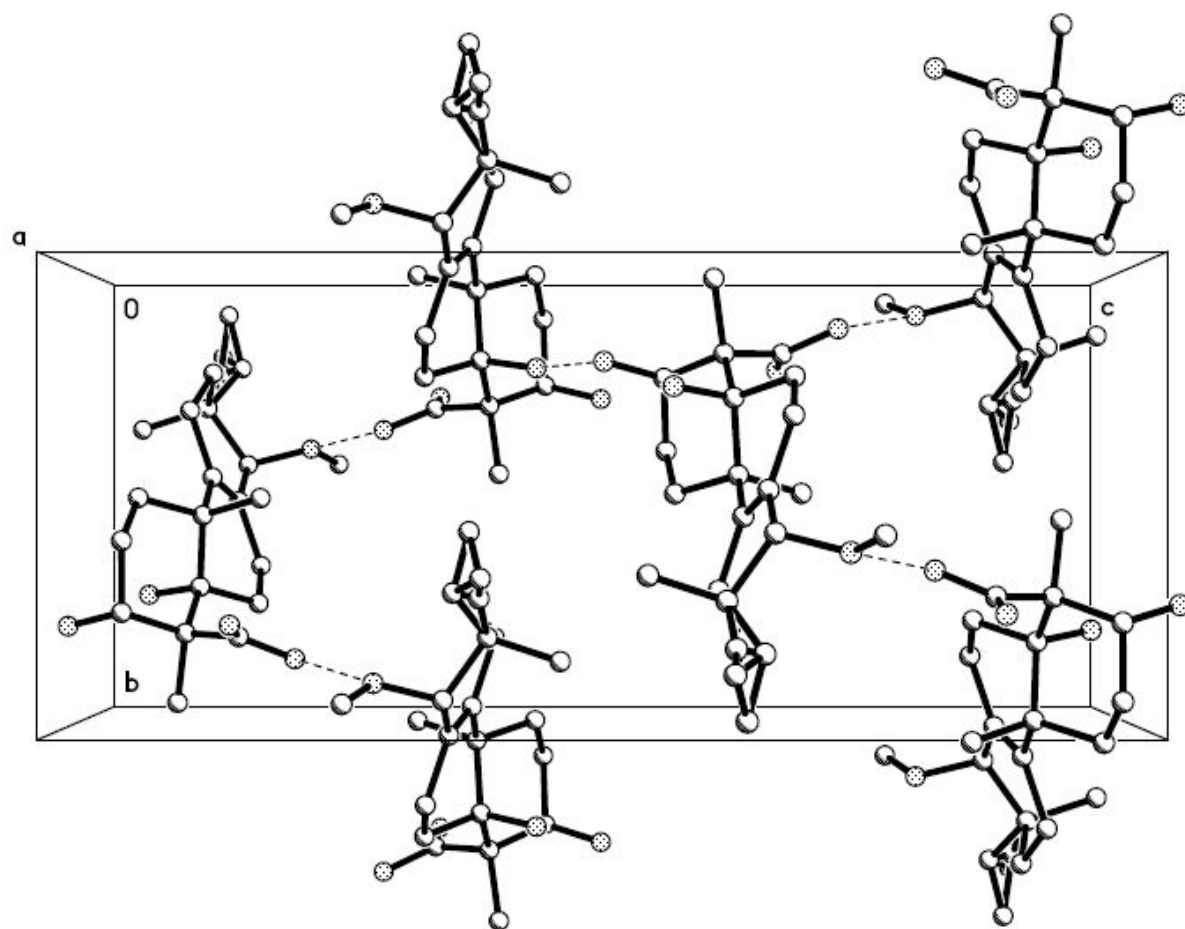

**Figure S63.** Key NOESY correlations of compounds **1–5** and **7**

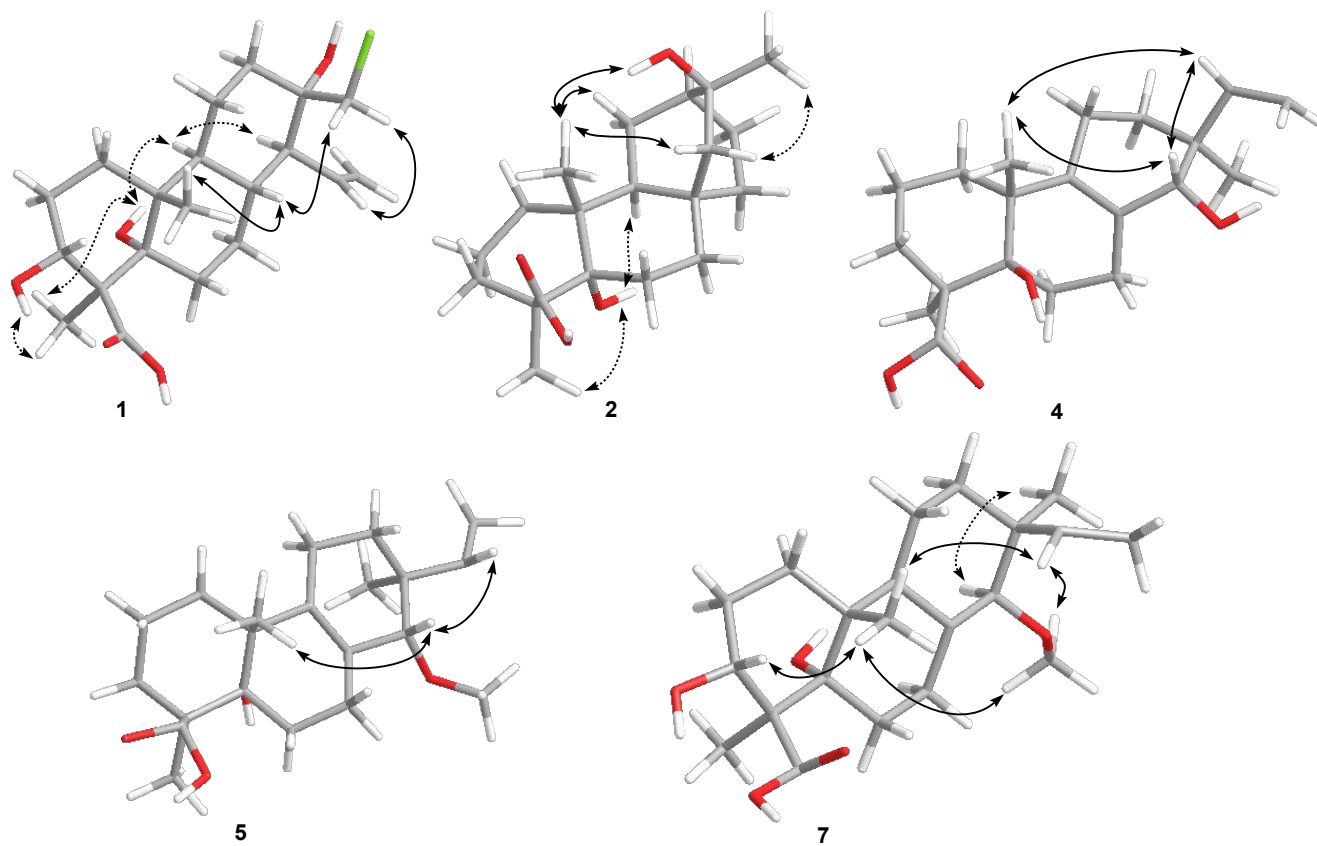

Table S1. Crystal data and structure refinement for compounds **1–5** and **7**.

| Identification code                | Compound 1                                                                                                         | Compound 2                                                                                                              | Compound 3                                                                                                                   | Compound 4                                                                                                                  | Compound 5                                                                                                                  | Compound 7                                                                                                      |
|------------------------------------|--------------------------------------------------------------------------------------------------------------------|-------------------------------------------------------------------------------------------------------------------------|------------------------------------------------------------------------------------------------------------------------------|-----------------------------------------------------------------------------------------------------------------------------|-----------------------------------------------------------------------------------------------------------------------------|-----------------------------------------------------------------------------------------------------------------|
| Empirical formula                  | C <sub>20</sub> H <sub>31</sub> ClO <sub>5</sub>                                                                   | C <sub>20</sub> H <sub>32</sub> O <sub>4</sub>                                                                          | C <sub>40</sub> H <sub>66</sub> O <sub>11</sub>                                                                              | C <sub>21</sub> H <sub>34</sub> O <sub>5</sub>                                                                              | C <sub>21</sub> H <sub>32</sub> O <sub>4</sub>                                                                              | C <sub>21</sub> H <sub>32</sub> O <sub>5</sub>                                                                  |
| Formula weight                     | 386.90                                                                                                             | 336.45                                                                                                                  | 722.92                                                                                                                       | 366.48                                                                                                                      | 348.47                                                                                                                      | 364.47                                                                                                          |
| Temperature                        | 300(2) K                                                                                                           | 297(2) K                                                                                                                | 293(2) K                                                                                                                     | 293(2) K                                                                                                                    | 298(2) K                                                                                                                    | 293(2) K                                                                                                        |
| Wavelength                         | 1.54178 Å                                                                                                          | 1.54178 Å                                                                                                               | 1.54178 Å                                                                                                                    | 1.54178 Å                                                                                                                   | 1.54178 Å                                                                                                                   | 1.54178 Å                                                                                                       |
| Crystal system,<br>space group     | Orthorhombic,<br>P2(1)2(1)2(1)                                                                                     | Orthorhombic,<br>P2(1)2(1)2                                                                                             | Monoclinic, C2                                                                                                               | Monoclinic, P2(1)                                                                                                           | Monoclinic, P2(1)                                                                                                           | Orthorhombic,<br>P2(1)2(1)2(1)                                                                                  |
| Unit cell dimensions               | a = 7.6170 (2) Å,<br>alpha = 90 deg. b =<br>11.8104 (3) Å, beta =<br>90 deg. c = 22.6071 (6) Å,<br>gamma = 90 deg. | a = 12.7945 (18) Å,<br>alpha = 90 deg. b =<br>26.092 (4) Å, beta =<br>90 deg. c = 11.4869<br>(16) Å, gamma = 90<br>deg. | a = 25.917(3) Å,<br>alpha = 90 deg.<br>b = 12.6548(16) Å,<br>beta = 118.868(4)<br>deg. c = 13.9501(15) Å,<br>gamma = 90 deg. | a = 7.2621(8) Å,<br>alpha = 90 deg.<br>b = 12.6474(10) Å,<br>beta = 99.188(2) deg.<br>c = 10.7864(12) Å,<br>gamma = 90 deg. | a = 7.7113(2) Å,<br>alpha = 90 deg.<br>b = 10.3066(2) Å,<br>beta = 97.2150(10)<br>deg. c = 12.1791(3) Å,<br>gamma = 90 deg. | a = 9.4565(5) Å,<br>alpha = 90 deg.<br>b = 9.5803(7) Å, beta<br>= 90 deg. c = 22.1890(14) Å,<br>gamma = 90 deg. |
| Volume                             | 2033.73(9) Å <sup>3</sup>                                                                                          | 3834.7(9) Å <sup>3</sup>                                                                                                | 4006.7(8) Å <sup>3</sup>                                                                                                     | 977.98(17) Å <sup>3</sup>                                                                                                   | 960.30(4) Å <sup>3</sup>                                                                                                    | 2010.2(2) Å <sup>3</sup>                                                                                        |
| Z, Calculated density              | 4, 1.264 Mg/m <sup>3</sup>                                                                                         | 8, 1.166 Mg/m <sup>3</sup>                                                                                              | 4, 1.198 Mg/m <sup>3</sup>                                                                                                   | 2, 1.245 Mg/m <sup>3</sup>                                                                                                  | 2, 1.205 Mg/m <sup>3</sup>                                                                                                  | 4, 1.204 Mg/m <sup>3</sup>                                                                                      |
| Absorption<br>coefficient          | 1.884 mm <sup>-1</sup>                                                                                             | 0.633 mm <sup>-1</sup>                                                                                                  | 0.697 mm <sup>-1</sup>                                                                                                       | 0.701 mm <sup>-1</sup>                                                                                                      | 0.651 mm <sup>-1</sup>                                                                                                      | 0.682 mm <sup>-1</sup>                                                                                          |
| F(000)                             | 832                                                                                                                | 1472                                                                                                                    | 1576                                                                                                                         | 400                                                                                                                         | 380                                                                                                                         | 792                                                                                                             |
| Crystal size                       | 0.160 x 0.150 x<br>0.120 mm                                                                                        | 0.180 x 0.160 x<br>0.140 mm                                                                                             | 0.26 x 0.15 x 0.10<br>mm                                                                                                     | 0.23 x 0.20 x 0.18<br>mm                                                                                                    | 0.180 x 0.160 x<br>0.150 mm                                                                                                 | 0.38 x 0.20 x 0.12<br>mm                                                                                        |
| Theta range for data<br>collection | 4.223 to 68.207 deg.                                                                                               | 3.388 to 65.104 deg.                                                                                                    | 3.62 to 66.03 deg.                                                                                                           | 4.15 to 66.05 deg.                                                                                                          | 5.642 to 68.222 deg.                                                                                                        | 3.98 to 66.03 deg.                                                                                              |

|                                   |                                             |                                             |                                             |                                             |                                             |                                             |
|-----------------------------------|---------------------------------------------|---------------------------------------------|---------------------------------------------|---------------------------------------------|---------------------------------------------|---------------------------------------------|
| Limiting indices                  | -9<=h<=9,<br>14<=k<=14,<br>27<=l<=26        | -14<=h<=15,<br>30<=k<=30,<br>13<=l<=13      | -30<=h<=30,<br>14<=k<=14,<br>14<=l<=16      | -8<=h<=8,<br>14<=k<=14,<br>12<=l<=12        | -9<=h<=9,<br>12<=k<=12,<br>14<=l<=14        | -11<=h<=7,<br>7<=k<=11,<br>24<=l<=26        |
| Reflections collected / unique    | 33394 / 3696 [R(int) = 0.0436]              | 41676 / 6516 [R(int) = 0.0776]              | 12865/6638 [R(int) = 0.0628]                | 5856/2915 [R(int) = 0.0676]                 | 13464/3523 [R(int) = 0.0361]                | 6843/3437 [R(int) = 0.0319]                 |
| Completeness to theta = 67.679    | 99.4 %                                      | 99.7 %                                      | 99.7 %                                      | 99.8 %                                      | 99.8 %                                      | 100 %                                       |
| Refinement method                 | Full-matrix least-squares on F <sup>2</sup> |
| Absorption correction             | Semi-empirical from equivalents             |
| Data / restraints / parameters    | 3696 / 2 / 248                              | 6516 / 1 / 455                              | 6638/1/468                                  | 2915/8/240                                  | 3523/3/236                                  | 3437/4/250                                  |
| Goodness-of-fit on F <sup>2</sup> | 1.083                                       | 1.056                                       | 1.067                                       | 1.042                                       | 1.127                                       | 1.032                                       |
| Final R indices [I>2sigma(I)]     | R1 = 0.0467, wR2 = 0.1338                   | R1 = 0.0539, wR2 = 0.1447                   | R1 = 0.1038, wR2 = 0.2491                   | R1 = 0.0627, wR2 = 0.1366                   | R1 = 0.0519, wR2 = 0.1372                   | R1 = 0.0459, wR2 = 0.1116                   |
| R indices (all data)              | R1 = 0.0487, wR2 = 0.1366                   | R1 = 0.0679, wR2 = 0.1565                   | R1 = 0.1521, wR2 = 0.3021                   | R1 = 0.0904, wR2 = 0.1571                   | R1 = 0.0565, wR2 = 0.1420                   | R1 = 0.0583, wR2 = 0.1212                   |
| Absolute structure parameter      | 0.08(3)                                     | 0.0(3)                                      | 0.0(5)                                      | 0.0(5)                                      | 0.0(3)                                      | 0.0(3)                                      |
| Extinction coefficient            | n/a                                         | n/a                                         | n/a                                         | n/a                                         | n/a                                         | n/a                                         |
| Largest diff. peak and hole       | 0.263 and -0.299 e.A <sup>-3</sup>          | 0.419 and -0.190 e.A <sup>-3</sup>          | 0.422 and -0.363 e.A <sup>-3</sup>          | 0.159 and -0.174 e.A <sup>-3</sup>          | 0.461 and -0.209 e.A <sup>-3</sup>          | 0.158 and -0.150 e.A <sup>-3</sup>          |
